# Supplementary material for: Serum miR-1290 and miR-1246 as Potential Diagnostic Biomarkers of Human Pancreatic Cancer
Source: PubMed Central journal article supplement (PMC6995378; doi:10.7150/jca.38048), 2020-01-01
Supplement: jcav11p1325s1.pdf [file jcav11p1325s1.pdf]

**A**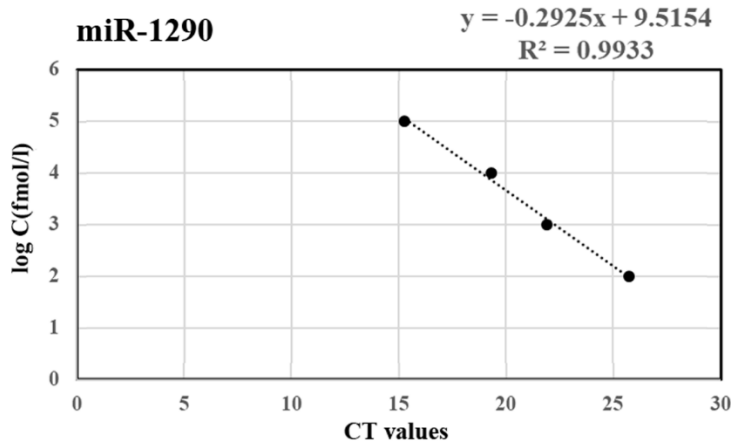**B**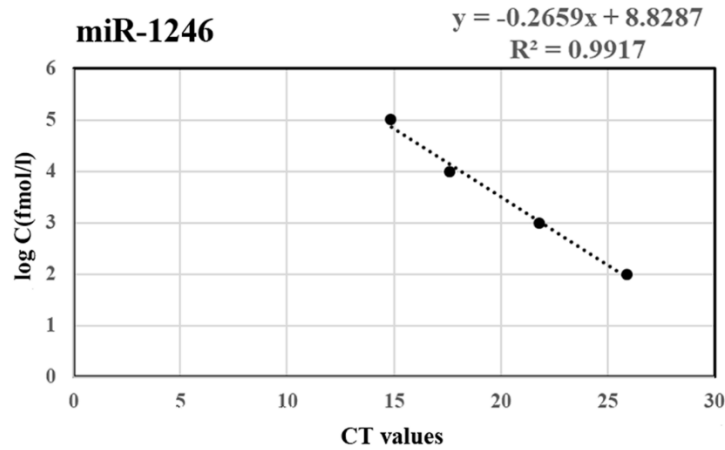

**Supplementary Figure S1. Standard curves of miR-1290 and miR-1246 using synthetic mature miRNAs.** For each assay, ten-fold serial dilution of synthetic miRNA from 10 fmol/L to  $10^7$  pmol/L was used to generate the standard curves. The resulting Cq values were plotted versus the  $\log_{10}$  of the amount of synthetic miRNAs. Each point represents the mean of three independent experiments.

**A**

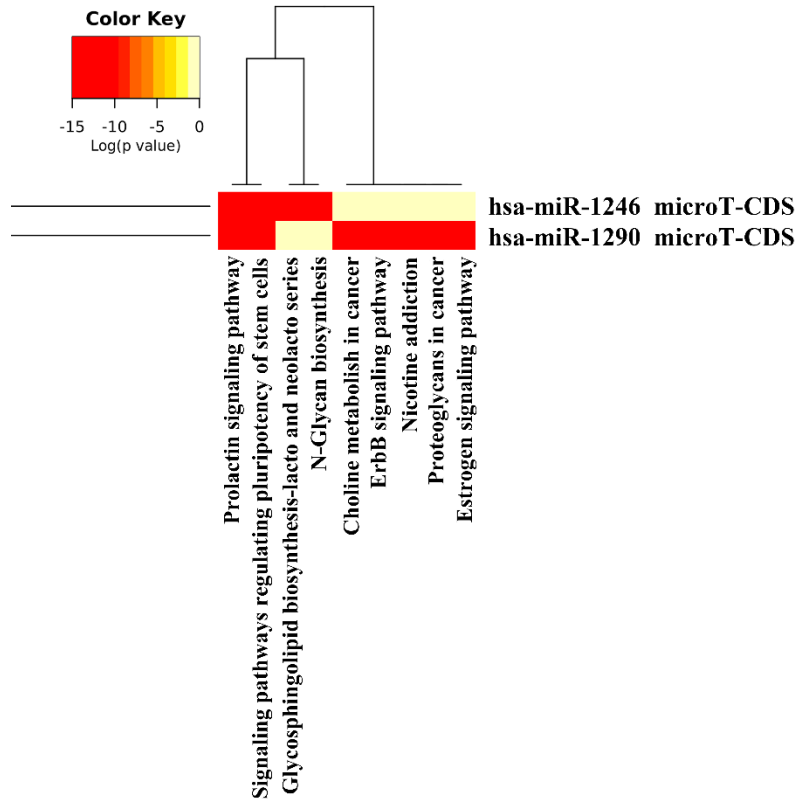

**B**

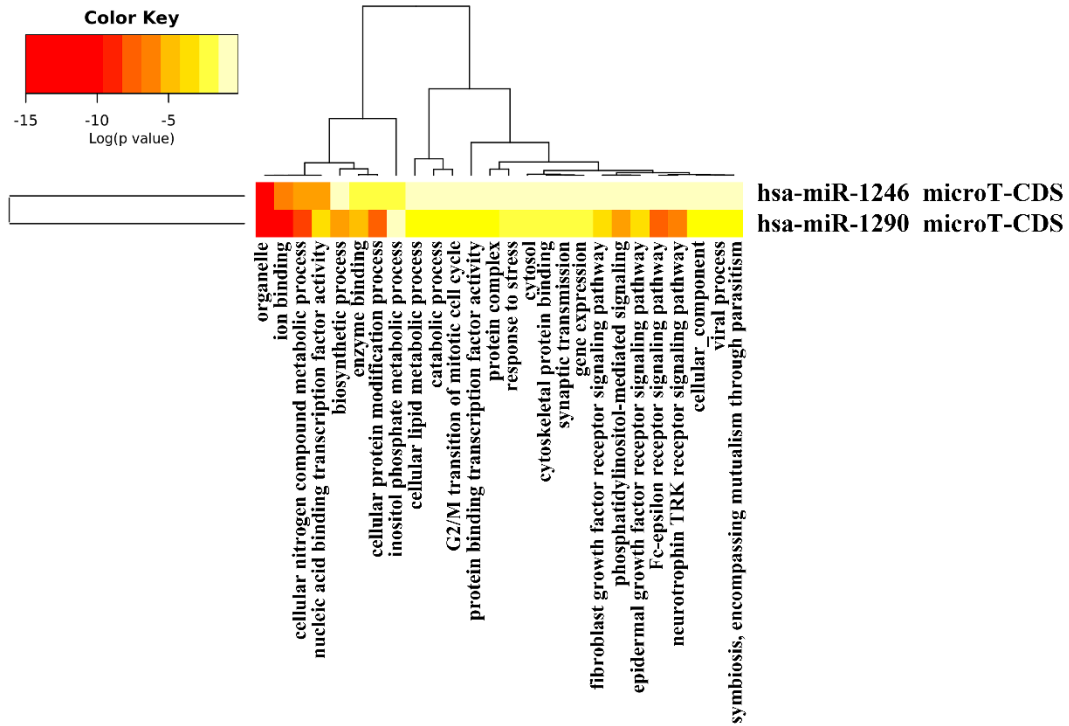

**Supplementary Figure S2.** Heat-maps of pathway investigation using KEGG (A) and GO (B) analyses of miR-1290 and miR-1246.

KEGG: Kyoto Encyclopedia of Genes and Genomes; GO: Gene Ontology.

## Supplementary Table S1

### GSE113486 upregulated miRNAs

| ID           | adj.P.Val | P.Value  | t    | B    | logFC | miRNA_ID_LIST    |
|--------------|-----------|----------|------|------|-------|------------------|
| MIMAT0015072 | 5.82E-17  | 1.52E-18 | 10.2 | 31.5 | 4.882 | hsa-miR-320e     |
| MIMAT0000683 | 1.97E-15  | 5.99E-17 | 9.54 | 27.9 | 4.591 | hsa-miR-302a-5p  |
| MIMAT0003254 | 5.49E-14  | 2.27E-15 | 8.92 | 24.3 | 4.513 | hsa-miR-548b-3p  |
| MIMAT0023698 | 4.72E-11  | 4.03E-12 | 7.59 | 16.9 | 4.485 | hsa-miR-6073     |
| MIMAT0005898 | 2.11E-09  | 3.06E-10 | 6.78 | 12.7 | 4.483 | hsa-miR-1246     |
| MIMAT0004597 | 2.48E-14  | 9.39E-16 | 9.07 | 25.2 | 4.48  | hsa-miR-140-3p   |
| MIMAT0000440 | 8.97E-12  | 6.68E-13 | 7.92 | 18.7 | 4.363 | hsa-miR-191-5p   |
| MIMAT0004697 | 2.96E-16  | 8.42E-18 | 9.88 | 29.8 | 4.304 | hsa-miR-151a-5p  |
| MIMAT0019025 | 3.33E-12  | 2.19E-13 | 8.12 | 19.8 | 4.295 | hsa-miR-4490     |
| MIMAT0003252 | 1.41E-11  | 1.10E-12 | 7.83 | 18.2 | 4.294 | hsa-miR-586      |
| MIMAT0005880 | 8.13E-12  | 5.96E-13 | 7.94 | 18.8 | 4.187 | hsa-miR-1290     |
| MIMAT0004810 | 6.34E-11  | 5.78E-12 | 7.52 | 16.6 | 4.178 | hsa-miR-629-5p   |
| MIMAT0004490 | 2.77E-11  | 2.27E-12 | 7.7  | 17.5 | 4.178 | hsa-miR-19a-5p   |
| MIMAT0000083 | 1.65E-12  | 1.02E-13 | 8.25 | 20.6 | 4.148 | hsa-miR-26b-5p   |
| MIMAT0019232 | 1.13E-11  | 8.62E-13 | 7.87 | 18.5 | 4.107 | hsa-miR-4423-5p  |
| MIMAT0022497 | 2.58E-12  | 1.64E-13 | 8.17 | 20.1 | 4.086 | hsa-miR-5692b    |
| MIMAT0000064 | 4.18E-10  | 4.91E-11 | 7.13 | 14.5 | 4.081 | hsa-let-7c-5p    |
| MIMAT0015018 | 3.12E-14  | 1.20E-15 | 9.03 | 24.9 | 4.062 | hsa-miR-3146     |
| MIMAT0019223 | 4.13E-12  | 2.78E-13 | 8.07 | 19.6 | 4.045 | hsa-miR-3688-5p  |
| MIMAT0010214 | 7.35E-12  | 5.33E-13 | 7.96 | 18.9 | 4.033 | hsa-miR-151b     |
| MIMAT0000062 | 3.00E-10  | 3.35E-11 | 7.2  | 14.9 | 3.999 | hsa-let-7a-5p    |
| MIMAT0000099 | 6.13E-11  | 5.54E-12 | 7.53 | 16.6 | 3.987 | hsa-miR-101-3p   |
| MIMAT0002868 | 1.29E-14  | 4.59E-16 | 9.2  | 25.9 | 3.956 | hsa-miR-522-3p   |
| MIMAT0001532 | 8.88E-12  | 6.57E-13 | 7.92 | 18.7 | 3.919 | hsa-miR-448      |
| MIMAT0004505 | 9.36E-12  | 7.00E-13 | 7.91 | 18.7 | 3.912 | hsa-miR-32-3p    |
| MIMAT0000097 | 7.07E-11  | 6.59E-12 | 7.5  | 16.5 | 3.907 | hsa-miR-99a-5p   |
| MIMAT0019935 | 2.81E-10  | 3.12E-11 | 7.21 | 14.9 | 3.896 | hsa-miR-4777-3p  |
| MIMAT0003255 | 1.98E-12  | 1.23E-13 | 8.22 | 20.4 | 3.866 | hsa-miR-588      |
| MIMAT0000069 | 1.10E-09  | 1.47E-10 | 6.92 | 13.4 | 3.861 | hsa-miR-16-5p    |
| MIMAT0000065 | 3.05E-09  | 4.63E-10 | 6.7  | 12.3 | 3.86  | hsa-let-7d-5p    |
| MIMAT0000252 | 1.65E-12  | 1.01E-13 | 8.25 | 20.6 | 3.854 | hsa-miR-7-5p     |
| MIMAT0019199 | 1.89E-11  | 1.52E-12 | 7.77 | 17.9 | 3.845 | hsa-miR-3121-5p  |
| MIMAT0004681 | 5.50E-11  | 4.83E-12 | 7.56 | 16.8 | 3.843 | hsa-miR-26a-2-3p |
| MIMAT0000461 | 6.29E-10  | 7.89E-11 | 7.04 | 14   | 3.829 | hsa-miR-195-5p   |
| MIMAT0000254 | 4.95E-11  | 4.27E-12 | 7.58 | 16.9 | 3.829 | hsa-miR-10b-5p   |
| MIMAT0019763 | 6.36E-14  | 2.78E-15 | 8.88 | 24.1 | 3.826 | hsa-miR-4679     |
| MIMAT0019959 | 1.48E-09  | 2.03E-10 | 6.86 | 13.1 | 3.803 | hsa-miR-4789-5p  |
| MIMAT0000436 | 7.50E-11  | 7.02E-12 | 7.49 | 16.4 | 3.797 | hsa-miR-144-3p   |
| MIMAT0000098 | 1.34E-10  | 1.35E-11 | 7.37 | 15.8 | 3.795 | hsa-miR-100-5p   |
| MIMAT0002870 | 3.97E-14  | 1.55E-15 | 8.99 | 24.7 | 3.793 | hsa-miR-499a-5p  |
| MIMAT0019785 | 4.64E-14  | 1.86E-15 | 8.95 | 24.5 | 3.767 | hsa-miR-4693-3p  |
| MIMAT0000082 | 1.27E-08  | 2.24E-09 | 6.39 | 10.7 | 3.762 | hsa-miR-26a-5p   |
| MIMAT0026621 | 5.77E-14  | 2.47E-15 | 8.9  | 24.2 | 3.753 | hsa-miR-605-3p   |
| MIMAT0019875 | 1.39E-10  | 1.43E-11 | 7.36 | 15.7 | 3.752 | hsa-miR-4744     |
| MIMAT0003238 | 3.53E-10  | 4.00E-11 | 7.17 | 14.7 | 3.745 | hsa-miR-573      |
| MIMAT0004768 | 5.77E-14  | 2.46E-15 | 8.91 | 24.2 | 3.694 | hsa-miR-497-3p   |
| MIMAT0002864 | 1.29E-09  | 1.76E-10 | 6.89 | 13.2 | 3.687 | hsa-miR-518d-3p  |
| MIMAT0000274 | 1.87E-10  | 2.01E-11 | 7.29 | 15.4 | 3.681 | hsa-miR-217      |
| MIMAT0017984 | 4.29E-17  | 1.07E-18 | 10.2 | 31.9 | 3.676 | hsa-miR-3607-5p  |
| MIMAT0002888 | 1.20E-13  | 5.39E-15 | 8.77 | 23.5 | 3.67  | hsa-miR-532-5p   |
| MIMAT0000096 | 6.30E-10  | 7.94E-11 | 7.04 | 14   | 3.663 | hsa-miR-98-5p    |
| MIMAT0026478 | 1.25E-11  | 9.62E-13 | 7.85 | 18.3 | 3.654 | hsa-miR-133a-5p  |
| MIMAT0003272 | 1.37E-11  | 1.06E-12 | 7.83 | 18.2 | 3.646 | hsa-miR-604      |
| MIMAT0026623 | 5.77E-14  | 2.45E-15 | 8.91 | 24.2 | 3.639 | hsa-miR-627-3p   |
| MIMAT0003258 | 5.80E-11  | 5.14E-12 | 7.55 | 16.7 | 3.624 | hsa-miR-590-5p   |

|              |          |          |      |      |       |                  |
|--------------|----------|----------|------|------|-------|------------------|
| MIMAT0016844 | 5.63E-10 | 6.87E-11 | 7.06 | 14.1 | 3.623 | hsa-miR-4295     |
| MIMAT0000079 | 3.80E-09 | 5.97E-10 | 6.65 | 12   | 3.616 | hsa-miR-24-1-5p  |
| MIMAT0019805 | 2.03E-15 | 6.25E-17 | 9.54 | 27.9 | 3.603 | hsa-miR-4705     |
| MIMAT0022301 | 1.44E-16 | 3.94E-18 | 10   | 30.6 | 3.598 | hsa-miR-5591-5p  |
| MIMAT0019731 | 2.24E-13 | 1.09E-14 | 8.65 | 22.8 | 3.595 | hsa-miR-4662a-5p |
| MIMAT0000688 | 2.47E-11 | 2.01E-12 | 7.72 | 17.6 | 3.592 | hsa-miR-301a-3p  |
| MIMAT0000419 | 1.34E-10 | 1.35E-11 | 7.37 | 15.8 | 3.589 | hsa-miR-27b-3p   |
| MIMAT0006764 | 4.16E-10 | 4.87E-11 | 7.13 | 14.5 | 3.578 | hsa-miR-320d     |
| MIMAT0000071 | 2.36E-11 | 1.91E-12 | 7.73 | 17.7 | 3.577 | hsa-miR-17-3p    |
| MIMAT0002849 | 1.69E-09 | 2.37E-10 | 6.83 | 12.9 | 3.574 | hsa-miR-524-5p   |
| MIMAT0000425 | 7.69E-10 | 9.86E-11 | 7    | 13.8 | 3.53  | hsa-miR-130a-3p  |
| MIMAT0003253 | 1.09E-10 | 1.07E-11 | 7.41 | 16   | 3.521 | hsa-miR-587      |
| MIMAT0014983 | 7.55E-13 | 4.29E-14 | 8.41 | 21.4 | 3.506 | hsa-miR-3121-3p  |
| MIMAT0004793 | 4.44E-10 | 5.24E-11 | 7.12 | 14.4 | 3.505 | hsa-miR-556-3p   |
| MIMAT0019929 | 2.62E-12 | 1.68E-13 | 8.16 | 20.1 | 3.503 | hsa-miR-4774-5p  |
| MIMAT0004749 | 1.88E-10 | 2.03E-11 | 7.29 | 15.3 | 3.503 | hsa-miR-424-3p   |
| MIMAT0021037 | 5.07E-10 | 6.12E-11 | 7.09 | 14.3 | 3.499 | hsa-miR-548ap-5p |
| MIMAT0017985 | 5.50E-15 | 1.78E-16 | 9.36 | 26.8 | 3.487 | hsa-miR-3607-3p  |
| MIMAT0022285 | 1.25E-13 | 5.65E-15 | 8.76 | 23.4 | 3.484 | hsa-miR-5585-5p  |
| MIMAT0022706 | 1.61E-13 | 7.60E-15 | 8.71 | 23.1 | 3.473 | hsa-miR-561-5p   |
| MIMAT0019741 | 3.66E-09 | 5.72E-10 | 6.66 | 12.1 | 3.472 | hsa-miR-4666a-5p |
| MIMAT0027627 | 8.98E-10 | 1.17E-10 | 6.96 | 13.6 | 3.472 | hsa-miR-6863     |
| MIMAT0003279 | 1.47E-10 | 1.54E-11 | 7.34 | 15.6 | 3.468 | hsa-miR-611      |
| MIMAT0004698 | 6.99E-13 | 3.91E-14 | 8.42 | 21.5 | 3.464 | hsa-miR-135b-3p  |
| MIMAT0000717 | 4.76E-09 | 7.65E-10 | 6.6  | 11.8 | 3.454 | hsa-miR-302c-3p  |
| MIMAT0004913 | 1.19E-12 | 7.03E-14 | 8.32 | 20.9 | 3.449 | hsa-miR-891b     |
| MIMAT0016902 | 1.33E-12 | 8.01E-14 | 8.29 | 20.8 | 3.446 | hsa-miR-4272     |
| MIMAT0019078 | 6.03E-13 | 3.29E-14 | 8.45 | 21.7 | 3.439 | hsa-miR-4536-5p  |
| MIMAT0000066 | 7.67E-09 | 1.28E-09 | 6.5  | 11.3 | 3.418 | hsa-let-7e-5p    |
| MIMAT0003287 | 1.37E-11 | 1.07E-12 | 7.83 | 18.2 | 3.415 | hsa-miR-618      |
| MIMAT0002850 | 1.86E-08 | 3.39E-09 | 6.31 | 10.3 | 3.401 | hsa-miR-524-3p   |
| MIMAT0004688 | 1.78E-10 | 1.90E-11 | 7.3  | 15.4 | 3.395 | hsa-miR-374a-3p  |
| MIMAT0002883 | 3.34E-11 | 2.80E-12 | 7.66 | 17.3 | 3.395 | hsa-miR-514a-3p  |
| MIMAT0022500 | 9.07E-11 | 8.66E-12 | 7.45 | 16.2 | 3.395 | hsa-miR-5706     |
| MIMAT0016885 | 5.01E-11 | 4.34E-12 | 7.58 | 16.9 | 3.391 | hsa-miR-4255     |
| MIMAT0004972 | 4.08E-10 | 4.76E-11 | 7.13 | 14.5 | 3.381 | hsa-miR-922      |
| MIMAT0027632 | 1.33E-12 | 7.97E-14 | 8.3  | 20.8 | 3.379 | hsa-miR-6866-5p  |
| MIMAT0016898 | 3.00E-09 | 4.48E-10 | 6.71 | 12.3 | 3.374 | hsa-miR-4263     |
| MIMAT0019024 | 1.39E-10 | 1.42E-11 | 7.36 | 15.7 | 3.373 | hsa-miR-548al    |
| MIMAT0030427 | 3.44E-11 | 2.90E-12 | 7.65 | 17.3 | 3.357 | hsa-miR-7852-3p  |
| MIMAT0002867 | 2.06E-09 | 2.98E-10 | 6.79 | 12.7 | 3.353 | hsa-miR-520h     |
| MIMAT0003220 | 6.91E-13 | 3.83E-14 | 8.43 | 21.5 | 3.353 | hsa-miR-556-5p   |
| MIMAT0019901 | 1.32E-07 | 2.79E-08 | 5.88 | 8.27 | 3.336 | hsa-miR-4757-5p  |
| MIMAT0019937 | 8.25E-12 | 6.08E-13 | 7.93 | 18.8 | 3.335 | hsa-miR-4778-3p  |
| MIMAT0000067 | 1.17E-08 | 2.04E-09 | 6.41 | 10.8 | 3.335 | hsa-let-7f-5p    |
| MIMAT0000435 | 6.39E-09 | 1.05E-09 | 6.54 | 11.5 | 3.335 | hsa-miR-143-3p   |
| MIMAT0003288 | 1.47E-10 | 1.54E-11 | 7.34 | 15.6 | 3.326 | hsa-miR-619-3p   |
| MIMAT0025466 | 5.99E-10 | 7.43E-11 | 7.05 | 14.1 | 3.322 | hsa-miR-6505-5p  |
| MIMAT0022484 | 1.69E-09 | 2.37E-10 | 6.83 | 12.9 | 3.317 | hsa-miR-5692a    |
| MIMAT0004699 | 7.04E-11 | 6.53E-12 | 7.5  | 16.5 | 3.315 | hsa-miR-148b-5p  |
| MIMAT0020959 | 7.61E-16 | 2.20E-17 | 9.72 | 28.9 | 3.315 | hsa-miR-4536-3p  |
| MIMAT0026606 | 1.01E-09 | 1.33E-10 | 6.94 | 13.5 | 3.308 | hsa-miR-511-3p   |
| MIMAT0026722 | 3.44E-15 | 1.09E-16 | 9.44 | 27.3 | 3.289 | hsa-miR-208b-5p  |
| MIMAT0002810 | 3.71E-08 | 7.15E-09 | 6.16 | 9.6  | 3.278 | hsa-miR-202-5p   |
| MIMAT0031175 | 3.05E-12 | 1.97E-13 | 8.13 | 19.9 | 3.275 | hsa-miR-548ba    |
| MIMAT0015040 | 2.39E-10 | 2.62E-11 | 7.25 | 15.1 | 3.271 | hsa-miR-3166     |
| MIMAT0000449 | 7.34E-08 | 1.50E-08 | 6.01 | 8.88 | 3.268 | hsa-miR-146a-5p  |
| MIMAT0003319 | 2.24E-09 | 3.26E-10 | 6.77 | 12.6 | 3.264 | hsa-miR-649      |

|              |          |          |      |      |       |                   |
|--------------|----------|----------|------|------|-------|-------------------|
| MIMAT0019727 | 6.86E-09 | 1.14E-09 | 6.53 | 11.4 | 3.253 | hsa-miR-4659a-3p  |
| MIMAT0019745 | 1.98E-13 | 9.51E-15 | 8.67 | 22.9 | 3.25  | hsa-miR-4668-5p   |
| MIMAT0019236 | 8.31E-09 | 1.39E-09 | 6.49 | 11.2 | 3.248 | hsa-miR-4529-5p   |
| MIMAT0018083 | 3.05E-13 | 1.56E-14 | 8.58 | 22.4 | 3.244 | hsa-miR-3662      |
| MIMAT0022965 | 7.35E-12 | 5.32E-13 | 7.96 | 18.9 | 3.24  | hsa-miR-3606-3p   |
| MIMAT0003269 | 3.87E-10 | 4.47E-11 | 7.15 | 14.6 | 3.234 | hsa-miR-601       |
| MIMAT0000733 | 4.41E-09 | 7.02E-10 | 6.62 | 11.9 | 3.232 | hsa-miR-379-5p    |
| MIMAT0000101 | 1.32E-07 | 2.81E-08 | 5.88 | 8.27 | 3.228 | hsa-miR-103a-3p   |
| MIMAT0019924 | 1.40E-10 | 1.45E-11 | 7.36 | 15.7 | 3.225 | hsa-miR-4770      |
| MIMAT0002866 | 5.93E-09 | 9.72E-10 | 6.56 | 11.6 | 3.223 | hsa-miR-517c-3p   |
| MIMAT0015004 | 1.82E-10 | 1.94E-11 | 7.3  | 15.4 | 3.221 | hsa-miR-544b      |
| MIMAT0003285 | 1.26E-09 | 1.71E-10 | 6.89 | 13.3 | 3.219 | hsa-miR-548c-3p   |
| MIMAT0000718 | 9.56E-09 | 1.62E-09 | 6.46 | 11.1 | 3.217 | hsa-miR-302d-3p   |
| MIMAT0004596 | 2.75E-09 | 4.06E-10 | 6.73 | 12.4 | 3.216 | hsa-miR-138-2-3p  |
| MIMAT0003331 | 1.26E-08 | 2.20E-09 | 6.4  | 10.8 | 3.214 | hsa-miR-655-3p    |
| MIMAT0019832 | 4.98E-14 | 2.02E-15 | 8.94 | 24.4 | 3.212 | hsa-miR-4719      |
| MIMAT0019730 | 2.33E-10 | 2.54E-11 | 7.25 | 15.1 | 3.212 | hsa-miR-4661-3p   |
| MIMAT0019816 | 9.43E-14 | 4.19E-15 | 8.81 | 23.7 | 3.199 | hsa-miR-4711-5p   |
| MIMAT0031893 | 4.24E-08 | 8.27E-09 | 6.13 | 9.46 | 3.198 | hsa-miR-181b-2-3p |
| MIMAT0022289 | 1.10E-09 | 1.48E-10 | 6.92 | 13.4 | 3.193 | hsa-miR-5587-5p   |
| MIMAT0001631 | 1.45E-06 | 3.91E-07 | 5.33 | 5.71 | 3.19  | hsa-miR-451a      |
| MIMAT0016872 | 6.08E-10 | 7.59E-11 | 7.05 | 14.1 | 3.188 | hsa-miR-4317      |
| MIMAT0010497 | 3.26E-11 | 2.72E-12 | 7.66 | 17.3 | 3.186 | hsa-miR-759       |
| MIMAT0019014 | 1.25E-08 | 2.19E-09 | 6.4  | 10.8 | 3.184 | hsa-miR-4480      |
| MIMAT0004601 | 6.68E-12 | 4.77E-13 | 7.98 | 19   | 3.182 | hsa-miR-145-3p    |
| MIMAT0019761 | 1.16E-10 | 1.15E-11 | 7.4  | 15.9 | 3.181 | hsa-miR-4677-3p   |
| MIMAT0018111 | 9.50E-13 | 5.52E-14 | 8.36 | 21.2 | 3.174 | hsa-miR-3683      |
| MIMAT0017997 | 3.28E-09 | 5.04E-10 | 6.68 | 12.2 | 3.174 | hsa-miR-3617-5p   |
| MIMAT0022287 | 8.15E-11 | 7.72E-12 | 7.47 | 16.3 | 3.172 | hsa-miR-5586-5p   |
| MIMAT0018990 | 2.39E-09 | 3.50E-10 | 6.75 | 12.6 | 3.17  | hsa-miR-548aj-3p  |
| MIMAT0017983 | 8.98E-14 | 3.96E-15 | 8.82 | 23.8 | 3.169 | hsa-miR-3606-5p   |
| MIMAT0018078 | 4.74E-12 | 3.27E-13 | 8.04 | 19.4 | 3.167 | hsa-miR-3658      |
| MIMAT0000241 | 2.51E-12 | 1.58E-13 | 8.17 | 20.1 | 3.164 | hsa-miR-208a-3p   |
| MIMAT0019230 | 6.49E-08 | 1.31E-08 | 6.04 | 9.01 | 3.158 | hsa-miR-3942-3p   |
| MIMAT0027564 | 6.02E-10 | 7.49E-11 | 7.05 | 14.1 | 3.156 | hsa-miR-6832-5p   |
| MIMAT0013517 | 1.72E-09 | 2.42E-10 | 6.83 | 12.9 | 3.154 | hsa-miR-2682-5p   |
| MIMAT0003328 | 1.49E-10 | 1.57E-11 | 7.34 | 15.6 | 3.141 | hsa-miR-653-5p    |
| MIMAT0000279 | 9.69E-08 | 2.03E-08 | 5.95 | 8.59 | 3.141 | hsa-miR-222-3p    |
| MIMAT0035704 | 1.05E-10 | 1.02E-11 | 7.42 | 16   | 3.141 | hsa-miR-548bb-3p  |
| MIMAT0004700 | 8.86E-10 | 1.15E-10 | 6.97 | 13.6 | 3.138 | hsa-miR-331-5p    |
| MIMAT0007399 | 7.66E-08 | 1.57E-08 | 6    | 8.83 | 3.133 | hsa-miR-1537-3p   |
| MIMAT0019914 | 6.99E-13 | 3.92E-14 | 8.42 | 21.5 | 3.133 | hsa-miR-4764-5p   |
| MIMAT0003260 | 1.58E-08 | 2.82E-09 | 6.35 | 10.5 | 3.127 | hsa-miR-592       |
| MIMAT0000084 | 5.25E-08 | 1.03E-08 | 6.09 | 9.24 | 3.107 | hsa-miR-27a-3p    |
| MIMAT0002871 | 3.73E-08 | 7.21E-09 | 6.16 | 9.59 | 3.09  | hsa-miR-500a-3p   |
| MIMAT0000684 | 1.60E-08 | 2.86E-09 | 6.35 | 10.5 | 3.09  | hsa-miR-302a-3p   |
| MIMAT0031006 | 2.82E-09 | 4.19E-10 | 6.72 | 12.4 | 3.088 | hsa-miR-8079      |
| MIMAT0018182 | 2.20E-14 | 8.16E-16 | 9.1  | 25.3 | 3.088 | hsa-miR-3908      |
| MIMAT0000693 | 1.27E-07 | 2.68E-08 | 5.89 | 8.31 | 3.087 | hsa-miR-30e-3p    |
| MIMAT0005928 | 1.19E-09 | 1.61E-10 | 6.9  | 13.3 | 3.085 | hsa-miR-548h-5p   |
| MIMAT0026638 | 3.41E-09 | 5.31E-10 | 6.67 | 12.1 | 3.081 | hsa-miR-1468-3p   |
| MIMAT0018112 | 6.95E-12 | 4.99E-13 | 7.97 | 19   | 3.08  | hsa-miR-3684      |
| MIMAT0005879 | 3.22E-08 | 6.12E-09 | 6.19 | 9.75 | 3.078 | hsa-miR-1289      |
| MIMAT0019790 | 7.55E-13 | 4.30E-14 | 8.4  | 21.4 | 3.076 | hsa-miR-4696      |
| MIMAT0005932 | 1.09E-12 | 6.40E-14 | 8.33 | 21   | 3.072 | hsa-miR-302f      |
| MIMAT0004692 | 4.44E-10 | 5.27E-11 | 7.11 | 14.4 | 3.068 | hsa-miR-340-5p    |
| MIMAT0026611 | 1.49E-09 | 2.05E-10 | 6.86 | 13.1 | 3.063 | hsa-miR-520g-5p   |
| MIMAT0018979 | 1.39E-10 | 1.43E-11 | 7.36 | 15.7 | 3.062 | hsa-miR-4457      |

|                 |          |          |      |      |       |                               |
|-----------------|----------|----------|------|------|-------|-------------------------------|
| MIMAT0026624    | 2.02E-13 | 9.77E-15 | 8.67 | 22.9 | 3.058 | hsa-miR-651-3p                |
| MIMAT0000278    | 3.28E-09 | 5.05E-10 | 6.68 | 12.2 | 3.057 | hsa-miR-221-3p                |
| MIMAT0005948    | 1.63E-11 | 1.29E-12 | 7.8  | 18.1 | 3.05  | hsa-miR-664a-5p               |
| MIMAT0001413    | 4.82E-07 | 1.17E-07 | 5.59 | 6.88 | 3.048 | hsa-miR-20b-5p                |
| MIMAT0018195    | 1.51E-07 | 3.25E-08 | 5.85 | 8.12 | 3.041 | hsa-miR-3920                  |
| MIMAT0018446, M | 1.57E-10 | 1.67E-11 | 7.33 | 15.5 | 3.038 | hsa-miR-548z, hsa-miR-548h-3p |
| MIMAT0000420    | 9.60E-10 | 1.25E-10 | 6.95 | 13.6 | 3.036 | hsa-miR-30b-5p                |
| MIMAT0004685    | 9.22E-09 | 1.55E-09 | 6.47 | 11.1 | 3.033 | hsa-miR-302d-5p               |
| MIMAT0000089    | 6.21E-08 | 1.24E-08 | 6.05 | 9.06 | 3.032 | hsa-miR-31-5p                 |
| MIMAT0003327    | 6.52E-08 | 1.32E-08 | 6.04 | 9.01 | 3.031 | hsa-miR-449b-5p               |
| MIMAT0004784    | 3.22E-08 | 6.13E-09 | 6.19 | 9.75 | 3.028 | hsa-miR-455-3p                |
| MIMAT0000281    | 1.38E-07 | 2.95E-08 | 5.87 | 8.22 | 3.027 | hsa-miR-224-5p                |
| MIMAT0004594    | 1.88E-09 | 2.67E-10 | 6.81 | 12.8 | 3.021 | hsa-miR-132-5p                |
| MIMAT0017988    | 1.33E-12 | 8.02E-14 | 8.29 | 20.8 | 3.02  | hsa-miR-3611                  |
| MIMAT0002848    | 4.66E-07 | 1.12E-07 | 5.59 | 6.92 | 3.018 | hsa-miR-518c-3p               |
| MIMAT0000434    | 2.14E-07 | 4.82E-08 | 5.77 | 7.74 | 3.018 | hsa-miR-142-3p                |
| MIMAT0019080    | 1.58E-09 | 2.20E-10 | 6.84 | 13   | 3.018 | hsa-miR-4537                  |
| MIMAT0026765    | 4.45E-12 | 3.04E-13 | 8.06 | 19.5 | 3.016 | hsa-miR-1537-5p               |
| MIMAT0004683    | 1.79E-07 | 3.95E-08 | 5.81 | 7.94 | 3.015 | hsa-miR-362-3p                |
| MIMAT0005793    | 6.68E-17 | 1.77E-18 | 10.1 | 31.4 | 3.014 | hsa-miR-320c                  |
| MIMAT0019890    | 1.84E-08 | 3.34E-09 | 6.31 | 10.3 | 3.013 | hsa-miR-4753-5p               |
| MIMAT0005909    | 1.52E-15 | 4.57E-17 | 9.59 | 28.2 | 3.012 | hsa-miR-1258                  |
| MIMAT0021131    | 1.39E-10 | 1.43E-11 | 7.36 | 15.7 | 3.011 | hsa-miR-5197-3p               |
| MIMAT0018198    | 1.64E-12 | 9.98E-14 | 8.26 | 20.6 | 3.011 | hsa-miR-3923                  |
| MIMAT0005913    | 2.93E-11 | 2.42E-12 | 7.68 | 17.4 | 3.009 | hsa-miR-1261                  |
| MIMAT0001536    | 1.91E-07 | 4.23E-08 | 5.8  | 7.87 | 3.005 | hsa-miR-429                   |
| MIMAT0003317    | 1.94E-07 | 4.31E-08 | 5.79 | 7.85 | 3.005 | hsa-miR-647                   |
| MIMAT0002882    | 4.68E-09 | 7.48E-10 | 6.61 | 11.8 | 3.005 | hsa-miR-510-5p                |
| MIMAT0003251    | 1.75E-07 | 3.84E-08 | 5.82 | 7.96 | 3.005 | hsa-miR-548a-3p               |
| MIMAT0027579    | 1.56E-09 | 2.16E-10 | 6.85 | 13   | 3.004 | hsa-miR-6838-3p               |
| MIMAT0016925    | 3.19E-10 | 3.60E-11 | 7.19 | 14.8 | 3.002 | hsa-miR-500b-5p               |
| MIMAT0004492    | 8.86E-08 | 1.84E-08 | 5.97 | 8.68 | 3.001 | hsa-miR-19b-2-5p              |
| MIMAT0015039    | 5.81E-10 | 7.16E-11 | 7.06 | 14.1 | 3.001 | hsa-miR-3165                  |
| MIMAT0019782    | 3.67E-10 | 4.18E-11 | 7.16 | 14.6 | 3     | hsa-miR-4691-3p               |
| MIMAT0018989, M | 4.07E-14 | 1.60E-15 | 8.98 | 24.7 | 2.997 | hsa-miR-548ai, hsa-miR-570-5p |
| MIMAT0005893    | 7.67E-08 | 1.58E-08 | 6    | 8.83 | 2.993 | hsa-miR-1305                  |
| MIMAT0019873    | 5.57E-08 | 1.10E-08 | 6.08 | 9.18 | 2.987 | hsa-miR-4742-3p               |
| MIMAT0005931    | 5.20E-12 | 3.61E-13 | 8.03 | 19.3 | 2.985 | hsa-miR-302e                  |
| MIMAT0022861    | 2.76E-13 | 1.37E-14 | 8.61 | 22.5 | 2.98  | hsa-miR-376c-5p               |
| MIMAT0014998    | 3.86E-10 | 4.43E-11 | 7.15 | 14.6 | 2.976 | hsa-miR-3133                  |
| MIMAT0002869    | 1.17E-08 | 2.04E-09 | 6.41 | 10.8 | 2.976 | hsa-miR-519a-3p               |
| MIMAT0022259    | 5.76E-23 | 6.06E-25 | 12.6 | 46.1 | 2.972 | hsa-miR-5100                  |
| MIMAT0000275    | 1.81E-07 | 3.99E-08 | 5.81 | 7.93 | 2.964 | hsa-miR-218-5p                |
| MIMAT0000454    | 9.04E-10 | 1.18E-10 | 6.96 | 13.6 | 2.96  | hsa-miR-184                   |
| MIMAT0003333    | 6.51E-11 | 5.97E-12 | 7.52 | 16.6 | 2.953 | hsa-miR-549a                  |
| MIMAT0019203    | 2.48E-12 | 1.56E-13 | 8.18 | 20.1 | 2.951 | hsa-miR-3136-3p               |
| MIMAT0002171    | 7.11E-07 | 1.81E-07 | 5.49 | 6.46 | 2.951 | hsa-miR-410-3p                |
| MIMAT0019748    | 3.21E-08 | 6.09E-09 | 6.19 | 9.76 | 2.95  | hsa-miR-219b-3p               |
| MIMAT0000682    | 1.69E-07 | 3.69E-08 | 5.83 | 8    | 2.948 | hsa-miR-200a-3p               |
| MIMAT0015060    | 2.20E-09 | 3.21E-10 | 6.77 | 12.6 | 2.947 | hsa-miR-548w                  |
| MIMAT0019751    | 3.01E-09 | 4.52E-10 | 6.71 | 12.3 | 2.945 | hsa-miR-4670-3p               |
| MIMAT0019938    | 1.79E-11 | 1.42E-12 | 7.78 | 18   | 2.945 | hsa-miR-4779                  |
| MIMAT0019005    | 2.67E-13 | 1.31E-14 | 8.61 | 22.6 | 2.944 | hsa-miR-4477b                 |
| MIMAT0004916    | 2.51E-10 | 2.77E-11 | 7.23 | 15   | 2.942 | hsa-miR-888-5p                |
| MIMAT0000070    | 1.84E-06 | 5.06E-07 | 5.27 | 5.46 | 2.939 | hsa-miR-17-5p                 |
| MIMAT0015016    | 2.62E-10 | 2.91E-11 | 7.23 | 15   | 2.938 | hsa-miR-3145-3p               |

|                 |          |          |      |      |       |                                                    |
|-----------------|----------|----------|------|------|-------|----------------------------------------------------|
| MIMAT0019872    | 5.99E-11 | 5.39E-12 | 7.54 | 16.6 | 2.938 | hsa-miR-4742-5p                                    |
| MIMAT0000251    | 2.04E-08 | 3.74E-09 | 6.29 | 10.2 | 2.927 | hsa-miR-147a                                       |
| MIMAT0005914    | 1.74E-13 | 8.26E-15 | 8.69 | 23   | 2.924 | hsa-miR-1262                                       |
| MIMAT0013516    | 3.27E-09 | 5.01E-10 | 6.69 | 12.2 | 2.923 | hsa-miR-2681-3p                                    |
| MIMAT0004507    | 1.78E-07 | 3.92E-08 | 5.81 | 7.94 | 2.92  | hsa-miR-92a-1-5p                                   |
| MIMAT0005792    | 2.28E-23 | 2.14E-25 | 12.8 | 47.1 | 2.916 | hsa-miR-320b                                       |
| MIMAT0005951    | 2.44E-43 | 9.50E-47 | 21.7 | 95.7 | 2.914 | hsa-miR-1307-3p                                    |
| MIMAT0026476    | 1.82E-08 | 3.28E-09 | 6.32 | 10.4 | 2.908 | hsa-miR-215-3p                                     |
| MIMAT0027379    | 4.77E-10 | 5.73E-11 | 7.1  | 14.3 | 2.907 | hsa-miR-6739-5p                                    |
| MIMAT0019801    | 2.17E-14 | 7.88E-16 | 9.1  | 25.4 | 2.907 | hsa-miR-4703-5p                                    |
| MIMAT0000418    | 3.12E-09 | 4.77E-10 | 6.7  | 12.3 | 2.907 | hsa-miR-23b-3p                                     |
| MIMAT0000072    | 2.02E-07 | 4.50E-08 | 5.79 | 7.81 | 2.902 | hsa-miR-18a-5p                                     |
| MIMAT0018091    | 7.39E-10 | 9.45E-11 | 7    | 13.8 | 2.901 | hsa-miR-3668                                       |
| MIMAT0019984    | 2.58E-08 | 4.81E-09 | 6.24 | 9.99 | 2.901 | hsa-miR-4804-5p                                    |
| MIMAT0005934    | 1.39E-10 | 1.42E-11 | 7.36 | 15.7 | 2.901 | hsa-miR-548p                                       |
| MIMAT0015056    | 6.90E-13 | 3.79E-14 | 8.43 | 21.5 | 2.899 | hsa-miR-3179                                       |
| MIMAT0018077    | 3.04E-09 | 4.58E-10 | 6.7  | 12.3 | 2.898 | hsa-miR-3657                                       |
| MIMAT0019742    | 1.47E-07 | 3.16E-08 | 5.86 | 8.15 | 2.892 | hsa-miR-4666a-3p                                   |
| MIMAT0003247    | 7.46E-07 | 1.90E-07 | 5.48 | 6.41 | 2.89  | hsa-miR-582-5p                                     |
| MIMAT0022269    | 3.33E-12 | 2.19E-13 | 8.12 | 19.8 | 2.89  | hsa-miR-5579-5p                                    |
| MIMAT0002172    | 3.07E-07 | 7.10E-08 | 5.69 | 7.37 | 2.89  | hsa-miR-376b-3p                                    |
| MIMAT0018093    | 1.84E-08 | 3.32E-09 | 6.32 | 10.4 | 2.887 | hsa-miR-3670                                       |
| MIMAT0019947    | 1.30E-41 | 1.01E-44 | 20.8 | 91.1 | 2.887 | hsa-miR-4783-3p                                    |
| MIMAT0002828    | 6.62E-11 | 6.09E-12 | 7.51 | 16.5 | 2.885 | hsa-miR-519e-5p                                    |
| MIMAT0000736    | 4.81E-07 | 1.16E-07 | 5.59 | 6.89 | 2.881 | hsa-miR-381-3p                                     |
| MIMAT0018202    | 1.10E-11 | 8.29E-13 | 7.88 | 18.5 | 2.88  | hsa-miR-3927-3p                                    |
| MIMAT0003236    | 3.22E-07 | 7.46E-08 | 5.68 | 7.32 | 2.879 | hsa-miR-571                                        |
| MIMAT0026736    | 1.12E-09 | 1.50E-10 | 6.92 | 13.4 | 2.878 | hsa-miR-548e-5p                                    |
| MIMAT0019029    | 3.21E-08 | 6.09E-09 | 6.19 | 9.76 | 2.878 | hsa-miR-4494                                       |
| MIMAT0018097    | 6.03E-13 | 3.29E-14 | 8.45 | 21.7 | 2.876 | hsa-miR-3674                                       |
| MIMAT0022928    | 4.26E-09 | 6.72E-10 | 6.63 | 11.9 | 2.876 | hsa-miR-376a-2-5p                                  |
| MIMAT0018199    | 5.98E-14 | 2.59E-15 | 8.9  | 24.2 | 2.876 | hsa-miR-3924                                       |
| MIMAT0016877    | 8.27E-11 | 7.87E-12 | 7.47 | 16.3 | 2.869 | hsa-miR-4256                                       |
| MIMAT0018094    | 6.51E-10 | 8.23E-11 | 7.03 | 14   | 2.868 | hsa-miR-3671                                       |
| MIMAT0022265    | 2.68E-07 | 6.15E-08 | 5.72 | 7.5  | 2.867 | hsa-miR-548ar-5p                                   |
| MIMAT0022705    | 3.08E-10 | 3.47E-11 | 7.19 | 14.8 | 2.864 | hsa-miR-539-3p                                     |
| MIMAT0031003    | 1.59E-13 | 7.42E-15 | 8.71 | 23.1 | 2.863 | hsa-miR-8076                                       |
| MIMAT0003885    | 1.78E-09 | 2.52E-10 | 6.82 | 12.9 | 2.862 | hsa-miR-454-3p                                     |
| MIMAT0000453    | 3.94E-08 | 7.66E-09 | 6.15 | 9.54 | 2.862 | hsa-miR-154-3p                                     |
| MIMAT0015030    | 6.02E-20 | 1.22E-21 | 11.4 | 38.6 | 2.859 | hsa-miR-3156-5p                                    |
| MIMAT0004917    | 6.64E-09 | 1.10E-09 | 6.53 | 11.4 | 2.858 | hsa-miR-888-3p                                     |
| MIMAT0000253    | 3.92E-08 | 7.61E-09 | 6.15 | 9.54 | 2.854 | hsa-miR-10a-5p                                     |
| MIMAT0018095    | 5.50E-10 | 6.69E-11 | 7.07 | 14.2 | 2.852 | hsa-miR-3672                                       |
| MIMAT0004803    | 3.80E-07 | 8.89E-08 | 5.64 | 7.15 | 2.849 | hsa-miR-548a-5p                                    |
| MIMAT0009978    | 4.97E-09 | 8.06E-10 | 6.59 | 11.7 | 2.848 | hsa-miR-2053                                       |
| MIMAT0004809    | 3.69E-09 | 5.79E-10 | 6.66 | 12.1 | 2.846 | hsa-miR-628-5p                                     |
| MIMAT0004806, M | 1.15E-07 | 2.43E-08 | 5.91 | 8.41 | 2.842 | hsa-miR-548c-5p, hsa-miR-548o-5p, hsa-miR-548am-5p |
| MIMAT0027581    | 2.34E-08 | 4.34E-09 | 6.26 | 10.1 | 2.836 | hsa-miR-6839-3p                                    |
| MIMAT0015012    | 3.38E-09 | 5.23E-10 | 6.68 | 12.2 | 2.835 | hsa-miR-3143                                       |
| MIMAT0000272    | 4.25E-07 | 1.00E-07 | 5.62 | 7.03 | 2.834 | hsa-miR-215-5p                                     |
| MIMAT0030988    | 5.32E-10 | 6.45E-11 | 7.08 | 14.2 | 2.832 | hsa-miR-8061                                       |
| MIMAT0022483    | 3.12E-09 | 4.77E-10 | 6.7  | 12.3 | 2.83  | hsa-miR-5691                                       |
| MIMAT0003329    | 4.15E-07 | 9.80E-08 | 5.62 | 7.05 | 2.828 | hsa-miR-411-5p                                     |
| MIMAT0018936    | 1.06E-07 | 2.23E-08 | 5.93 | 8.49 | 2.822 | hsa-miR-4423-3p                                    |
| MIMAT0019905    | 1.95E-09 | 2.77E-10 | 6.8  | 12.8 | 2.821 | hsa-miR-4759                                       |
| MIMAT0000417    | 1.09E-06 | 2.87E-07 | 5.39 | 6.01 | 2.819 | hsa-miR-15b-5p                                     |



|                 |          |          |      |      |       |                                       |
|-----------------|----------|----------|------|------|-------|---------------------------------------|
| MIMAT0000452    | 3.21E-08 | 6.09E-09 | 6.19 | 9.76 | 2.817 | hsa-miR-154-5p                        |
| MIMAT0004774    | 3.03E-09 | 4.57E-10 | 6.7  | 12.3 | 2.816 | hsa-miR-501-3p                        |
| MIMAT0021084    | 5.95E-08 | 1.19E-08 | 6.06 | 9.11 | 2.816 | hsa-miR-5092                          |
| MIMAT0018972    | 2.34E-16 | 6.58E-18 | 9.92 | 30.1 | 2.815 | hsa-miR-548ah-5p                      |
| MIMAT0017986    | 1.43E-10 | 1.49E-11 | 7.35 | 15.6 | 2.809 | hsa-miR-3609                          |
| MIMAT0004689    | 3.73E-08 | 7.22E-09 | 6.16 | 9.59 | 2.806 | hsa-miR-377-5p                        |
| MIMAT0019040    | 2.04E-09 | 2.95E-10 | 6.79 | 12.7 | 2.804 | hsa-miR-4504                          |
| MIMAT0022279    | 1.38E-08 | 2.44E-09 | 6.38 | 10.7 | 2.8   | hsa-miR-5582-5p                       |
| MIMAT0022270    | 7.03E-11 | 6.50E-12 | 7.5  | 16.5 | 2.8   | hsa-miR-5579-3p                       |
| MIMAT0003219    | 8.29E-08 | 1.72E-08 | 5.98 | 8.75 | 2.799 | hsa-miR-555                           |
| MIMAT0019974    | 3.87E-10 | 4.46E-11 | 7.15 | 14.6 | 2.799 | hsa-miR-4798-5p                       |
| MIMAT0000646    | 5.34E-07 | 1.31E-07 | 5.56 | 6.77 | 2.797 | hsa-miR-155-5p                        |
| MIMAT0005791    | 1.29E-09 | 1.76E-10 | 6.89 | 13.2 | 2.795 | hsa-miR-1264                          |
| MIMAT0004562    | 4.66E-07 | 1.12E-07 | 5.59 | 6.92 | 2.786 | hsa-miR-196a-3p                       |
| MIMAT0004566    | 2.57E-08 | 4.79E-09 | 6.24 | 9.99 | 2.78  | hsa-miR-218-2-3p                      |
| MIMAT0000273    | 1.94E-06 | 5.39E-07 | 5.25 | 5.4  | 2.779 | hsa-miR-216a-5p                       |
| MIMAT0011157    | 1.18E-06 | 3.13E-07 | 5.37 | 5.92 | 2.778 | hsa-miR-2114-3p                       |
| MIMAT0019971    | 6.00E-08 | 1.20E-08 | 6.06 | 9.1  | 2.778 | hsa-miR-4796-3p                       |
| MIMAT0005933    | 5.89E-13 | 3.17E-14 | 8.46 | 21.7 | 2.776 | hsa-miR-1277-3p                       |
| MIMAT0003286    | 6.26E-08 | 1.26E-08 | 6.05 | 9.05 | 2.775 | hsa-miR-617                           |
| MIMAT0019951    | 9.20E-11 | 8.83E-12 | 7.45 | 16.2 | 2.773 | hsa-miR-1245b-3p                      |
| MIMAT0000103    | 4.27E-06 | 1.27E-06 | 5.06 | 4.57 | 2.771 | hsa-miR-106a-5p                       |
| MIMAT0003226    | 1.73E-08 | 3.10E-09 | 6.33 | 10.4 | 2.771 | hsa-miR-562                           |
| MIMAT0019918    | 3.10E-09 | 4.71E-10 | 6.7  | 12.3 | 2.77  | hsa-miR-4766-3p                       |
| MIMAT0002873    | 5.93E-07 | 1.47E-07 | 5.54 | 6.66 | 2.769 | hsa-miR-502-5p                        |
| MIMAT0000458    | 2.06E-08 | 3.79E-09 | 6.29 | 10.2 | 2.766 | hsa-miR-190a-5p                       |
| MIMAT0000715    | 3.41E-07 | 7.92E-08 | 5.67 | 7.26 | 2.763 | hsa-miR-302b-3p                       |
| MIMAT0022482    | 5.79E-07 | 1.43E-07 | 5.54 | 6.69 | 2.762 | hsa-miR-5690                          |
| MIMAT0000269    | 2.01E-09 | 2.90E-10 | 6.79 | 12.7 | 2.759 | hsa-miR-212-3p                        |
| MIMAT0021026    | 7.20E-09 | 1.20E-09 | 6.52 | 11.3 | 2.748 | hsa-miR-5003-3p                       |
| MIMAT0019197    | 1.05E-10 | 1.01E-11 | 7.42 | 16   | 2.748 | hsa-miR-3117-5p                       |
| MIMAT0002827    | 5.37E-06 | 1.65E-06 | 5    | 4.32 | 2.746 | hsa-miR-515-3p                        |
| MIMAT0000085    | 2.55E-06 | 7.29E-07 | 5.19 | 5.11 | 2.746 | hsa-miR-28-5p                         |
| MIMAT0018998    | 6.67E-08 | 1.35E-08 | 6.03 | 8.98 | 2.745 | hsa-miR-4471                          |
| MIMAT0015037    | 4.76E-09 | 7.65E-10 | 6.6  | 11.8 | 2.741 | hsa-miR-3163                          |
| MIMAT0000074    | 4.68E-06 | 1.41E-06 | 5.04 | 4.47 | 2.74  | hsa-miR-19b-3p                        |
| MIMAT0000104    | 5.15E-06 | 1.57E-06 | 5.02 | 4.37 | 2.735 | hsa-miR-107                           |
| MIMAT0003271    | 5.79E-08 | 1.15E-08 | 6.07 | 9.14 | 2.732 | hsa-miR-603                           |
| MIMAT0003150    | 6.69E-10 | 8.51E-11 | 7.02 | 13.9 | 2.732 | hsa-miR-455-5p                        |
| MIMAT0003321    | 9.34E-07 | 2.42E-07 | 5.43 | 6.17 | 2.73  | hsa-miR-651-5p                        |
| MIMAT0004925    | 4.34E-09 | 6.88E-10 | 6.62 | 11.9 | 2.727 | hsa-miR-876-3p                        |
| MIMAT0022975    | 2.80E-08 | 5.28E-09 | 6.22 | 9.9  | 2.726 | hsa-miR-3934-3p                       |
| MIMAT0000090    | 2.65E-06 | 7.62E-07 | 5.18 | 5.06 | 2.722 | hsa-miR-32-5p                         |
| MIMAT0000448    | 5.75E-07 | 1.42E-07 | 5.54 | 6.69 | 2.72  | hsa-miR-136-5p                        |
| MIMAT0000705    | 2.49E-06 | 7.07E-07 | 5.19 | 5.14 | 2.719 | hsa-miR-362-5p                        |
| MIMAT0002881    | 7.11E-07 | 1.81E-07 | 5.49 | 6.46 | 2.718 | hsa-miR-509-3p                        |
| MIMAT0030993    | 2.49E-09 | 3.67E-10 | 6.75 | 12.5 | 2.717 | hsa-miR-8066                          |
| MIMAT0030983    | 4.37E-06 | 1.31E-06 | 5.06 | 4.54 | 2.715 | hsa-miR-8056                          |
| MIMAT0019969    | 1.86E-05 | 6.42E-06 | 4.69 | 3.01 | 2.714 | hsa-miR-4795-3p                       |
| MIMAT0000432    | 5.81E-10 | 7.14E-11 | 7.06 | 14.1 | 2.714 | hsa-miR-141-3p                        |
| MIMAT0032114, N | 2.49E-10 | 2.74E-11 | 7.24 | 15.1 | 2.708 | hsa-miR-548ad-5p,<br>hsa-miR-548ae-5p |
| MIMAT0018358    | 2.41E-09 | 3.54E-10 | 6.75 | 12.5 | 2.703 | hsa-miR-3942-5p                       |
| MIMAT0018081    | 9.66E-08 | 2.02E-08 | 5.95 | 8.59 | 2.703 | hsa-miR-3660                          |
| MIMAT0018988    | 8.87E-13 | 5.12E-14 | 8.37 | 21.2 | 2.697 | hsa-miR-4464                          |
| MIMAT0014981    | 6.61E-10 | 8.38E-11 | 7.03 | 14   | 2.697 | hsa-miR-3119                          |
| MIMAT0005945    | 1.08E-10 | 1.05E-11 | 7.41 | 16   | 2.695 | hsa-miR-1255b-5p                      |
| MIMAT0001541    | 2.22E-06 | 6.23E-07 | 5.22 | 5.26 | 2.695 | hsa-miR-449a                          |

|                 |          |          |      |      |       |                                                                  |
|-----------------|----------|----------|------|------|-------|------------------------------------------------------------------|
| MIMAT0022728    | 5.78E-11 | 5.09E-12 | 7.55 | 16.7 | 2.693 | hsa-miR-513c-3p                                                  |
| MIMAT0014980    | 4.54E-13 | 2.41E-14 | 8.51 | 22   | 2.692 | hsa-miR-3118                                                     |
| MIMAT0027677    | 2.58E-08 | 4.83E-09 | 6.24 | 9.99 | 2.691 | hsa-miR-6888-3p                                                  |
| MIMAT0015042    | 3.40E-09 | 5.27E-10 | 6.68 | 12.2 | 2.686 | hsa-miR-3167                                                     |
| MIMAT0018982    | 2.21E-05 | 7.80E-06 | 4.64 | 2.82 | 2.682 | hsa-miR-4460                                                     |
| MIMAT0019004    | 6.94E-07 | 1.75E-07 | 5.5  | 6.49 | 2.68  | hsa-miR-4477a                                                    |
| MIMAT0025851    | 2.58E-08 | 4.84E-09 | 6.24 | 9.98 | 2.679 | hsa-miR-6720-3p                                                  |
| MIMAT0024615    | 2.49E-08 | 4.62E-09 | 6.25 | 10   | 2.679 | hsa-miR-6131                                                     |
| MIMAT0000258    | 1.32E-06 | 3.53E-07 | 5.35 | 5.81 | 2.679 | hsa-miR-181c-5p                                                  |
| MIMAT0026625    | 1.87E-10 | 2.01E-11 | 7.29 | 15.4 | 2.677 | hsa-miR-653-3p                                                   |
| MIMAT0004686    | 1.36E-06 | 3.66E-07 | 5.34 | 5.77 | 2.675 | hsa-miR-367-5p                                                   |
| MIMAT0000068    | 9.07E-06 | 2.91E-06 | 4.87 | 3.77 | 2.674 | hsa-miR-15a-5p                                                   |
| MIMAT0000243    | 5.64E-08 | 1.12E-08 | 6.07 | 9.17 | 2.671 | hsa-miR-148a-3p                                                  |
| MIMAT0022267    | 2.11E-05 | 7.39E-06 | 4.66 | 2.87 | 2.67  | hsa-miR-548as-5p                                                 |
| MIMAT0022303    | 3.07E-10 | 3.45E-11 | 7.19 | 14.8 | 2.67  | hsa-miR-548av-5p                                                 |
| MIMAT0027629    | 5.42E-06 | 1.67E-06 | 5    | 4.31 | 2.665 | hsa-miR-6864-3p                                                  |
| MIMAT0022304    | 1.43E-08 | 2.55E-09 | 6.37 | 10.6 | 2.664 | hsa-miR-548av-3p                                                 |
| MIMAT0003303    | 9.51E-07 | 2.47E-07 | 5.42 | 6.15 | 2.662 | hsa-miR-633                                                      |
| MIMAT0003275    | 1.18E-08 | 2.05E-09 | 6.41 | 10.8 | 2.661 | hsa-miR-607                                                      |
| MIMAT0004956    | 3.66E-09 | 5.72E-10 | 6.66 | 12.1 | 2.661 | hsa-miR-374b-3p<br>hsa-miR-519c-5p, hsa-<br>miR-523-5p, hsa-miR- |
| MIMAT0002831, M | 4.81E-07 | 1.16E-07 | 5.59 | 6.89 | 2.652 | 518e-5p, hsa-miR-522-<br>5p, hsa-miR-519a-5p,<br>hsa-miR-519b-5n |
| MIMAT0019824    | 5.68E-09 | 9.27E-10 | 6.57 | 11.6 | 2.65  | hsa-miR-4715-5p                                                  |
| MIMAT0004551    | 1.44E-07 | 3.10E-08 | 5.86 | 8.17 | 2.648 | hsa-miR-30d-3p                                                   |
| MIMAT0004812    | 1.31E-07 | 2.78E-08 | 5.89 | 8.28 | 2.644 | hsa-miR-548d-5p                                                  |
| MIMAT0000431    | 2.41E-06 | 6.84E-07 | 5.2  | 5.17 | 2.644 | hsa-miR-140-5p                                                   |
| MIMAT0027589    | 4.89E-07 | 1.19E-07 | 5.58 | 6.87 | 2.641 | hsa-miR-6844                                                     |
| MIMAT0003268    | 4.66E-07 | 1.12E-07 | 5.59 | 6.92 | 2.641 | hsa-miR-600                                                      |
| MIMAT0018183    | 3.31E-06 | 9.70E-07 | 5.12 | 4.83 | 2.637 | hsa-miR-3909                                                     |
| MIMAT0004752    | 2.42E-07 | 5.47E-08 | 5.75 | 7.62 | 2.637 | hsa-miR-20b-3p                                                   |
| MIMAT0015009    | 1.70E-07 | 3.70E-08 | 5.83 | 8    | 2.636 | hsa-miR-548t-5p                                                  |
| MIMAT0004797    | 6.51E-07 | 1.62E-07 | 5.52 | 6.56 | 2.636 | hsa-miR-582-3p                                                   |
| MIMAT0005930    | 9.01E-08 | 1.87E-08 | 5.97 | 8.66 | 2.635 | hsa-miR-1276                                                     |
| MIMAT0004491    | 1.86E-06 | 5.15E-07 | 5.26 | 5.44 | 2.63  | hsa-miR-19b-1-5p                                                 |
| MIMAT0022288    | 1.24E-06 | 3.31E-07 | 5.36 | 5.87 | 2.626 | hsa-miR-5586-3p                                                  |
| MIMAT0019051    | 2.05E-06 | 5.71E-07 | 5.24 | 5.34 | 2.626 | hsa-miR-4514                                                     |
| MIMAT0005895    | 1.03E-05 | 3.31E-06 | 4.84 | 3.65 | 2.624 | hsa-miR-548f-3p                                                  |
| MIMAT0019960    | 1.51E-07 | 3.26E-08 | 5.85 | 8.12 | 2.62  | hsa-miR-4789-3p                                                  |
| MIMAT0027571    | 1.74E-05 | 5.90E-06 | 4.71 | 3.09 | 2.617 | hsa-miR-6835-3p                                                  |
| MIMAT0015007    | 3.28E-06 | 9.59E-07 | 5.13 | 4.84 | 2.615 | hsa-miR-3139                                                     |
| MIMAT0011159    | 4.93E-07 | 1.20E-07 | 5.58 | 6.86 | 2.615 | hsa-miR-2115-3p                                                  |
| MIMAT0003296    | 9.70E-08 | 2.03E-08 | 5.95 | 8.58 | 2.614 | hsa-miR-627-5p                                                   |
| MIMAT0027664    | 3.60E-08 | 6.91E-09 | 6.17 | 9.64 | 2.613 | hsa-miR-6882-5p                                                  |
| MIMAT0021023    | 8.53E-10 | 1.10E-10 | 6.98 | 13.7 | 2.612 | hsa-miR-5002-5p                                                  |
| MIMAT0004549    | 3.18E-07 | 7.35E-08 | 5.68 | 7.33 | 2.611 | hsa-miR-148a-5p                                                  |
| MIMAT0003274    | 1.29E-10 | 1.29E-11 | 7.38 | 15.8 | 2.609 | hsa-miR-606                                                      |
| MIMAT0019762    | 1.04E-09 | 1.37E-10 | 6.93 | 13.5 | 2.601 | hsa-miR-4678                                                     |
| MIMAT0004772    | 2.05E-08 | 3.76E-09 | 6.29 | 10.2 | 2.601 | hsa-miR-499a-3p                                                  |
| MIMAT0022696    | 2.35E-08 | 4.36E-09 | 6.26 | 10.1 | 2.6   | hsa-miR-301a-5p                                                  |
| MIMAT0000437    | 2.55E-06 | 7.28E-07 | 5.19 | 5.11 | 2.599 | hsa-miR-145-5p                                                   |
| MIMAT0026610    | 4.46E-07 | 1.06E-07 | 5.61 | 6.98 | 2.593 | hsa-miR-519d-5p                                                  |
| MIMAT0003322    | 1.65E-06 | 4.52E-07 | 5.29 | 5.57 | 2.591 | hsa-miR-652-3p                                                   |
| MIMAT0019916    | 2.16E-07 | 4.88E-08 | 5.77 | 7.73 | 2.587 | hsa-miR-4765                                                     |
| MIMAT0030020    | 1.85E-07 | 4.09E-08 | 5.81 | 7.9  | 2.581 | hsa-miR-7705                                                     |
| MIMAT0019036    | 2.42E-07 | 5.49E-08 | 5.74 | 7.62 | 2.581 | hsa-miR-4500                                                     |

|                 |          |          |      |      |       |                                |
|-----------------|----------|----------|------|------|-------|--------------------------------|
| MIMAT0027580    | 3.20E-11 | 2.66E-12 | 7.67 | 17.3 | 2.58  | hsa-miR-6839-5p                |
| MIMAT0019936    | 9.31E-09 | 1.58E-09 | 6.46 | 11.1 | 2.577 | hsa-miR-4778-5p                |
| MIMAT0000720    | 2.64E-06 | 7.56E-07 | 5.18 | 5.07 | 2.575 | hsa-miR-376c-3p                |
| MIMAT0000691    | 7.47E-06 | 2.36E-06 | 4.92 | 3.97 | 2.575 | hsa-miR-130b-3p                |
| MIMAT0021036    | 5.29E-08 | 1.04E-08 | 6.09 | 9.24 | 2.571 | hsa-miR-5007-3p                |
| MIMAT0003223    | 2.37E-07 | 5.35E-08 | 5.75 | 7.64 | 2.569 | hsa-miR-559                    |
| MIMAT0018969    | 9.29E-09 | 1.57E-09 | 6.46 | 11.1 | 2.569 | hsa-miR-548ag                  |
| MIMAT0019879    | 5.60E-07 | 1.38E-07 | 5.55 | 6.72 | 2.568 | hsa-miR-4745-3p                |
| MIMAT0019944    | 3.74E-11 | 3.16E-12 | 7.63 | 17.2 | 2.568 | hsa-miR-4782-5p                |
| MIMAT0019833    | 3.33E-09 | 5.14E-10 | 6.68 | 12.2 | 2.563 | hsa-miR-4720-5p                |
| MIMAT0002874    | 8.02E-07 | 2.06E-07 | 5.46 | 6.33 | 2.561 | hsa-miR-503-5p                 |
| MIMAT0016912    | 4.94E-07 | 1.20E-07 | 5.58 | 6.85 | 2.558 | hsa-miR-4282                   |
| MIMAT0018184    | 4.57E-10 | 5.45E-11 | 7.11 | 14.4 | 2.555 | hsa-miR-3910                   |
| MIMAT0003289    | 7.93E-11 | 7.45E-12 | 7.48 | 16.3 | 2.554 | hsa-miR-620                    |
| MIMAT0004907    | 3.06E-07 | 7.07E-08 | 5.69 | 7.37 | 2.549 | hsa-miR-892a                   |
| MIMAT0005917    | 2.00E-09 | 2.87E-10 | 6.79 | 12.7 | 2.549 | hsa-miR-548m                   |
| MIMAT0000424    | 1.77E-05 | 6.07E-06 | 4.7  | 3.06 | 2.548 | hsa-miR-128-3p                 |
| MIMAT0019968    | 1.18E-09 | 1.59E-10 | 6.91 | 13.3 | 2.548 | hsa-miR-4795-5p                |
| MIMAT0019752    | 1.47E-06 | 3.97E-07 | 5.32 | 5.7  | 2.547 | hsa-miR-4671-5p                |
| MIMAT0018114    | 3.40E-13 | 1.76E-14 | 8.56 | 22.3 | 2.546 | hsa-miR-3686                   |
| MIMAT0001545    | 1.03E-06 | 2.68E-07 | 5.41 | 6.07 | 2.539 | hsa-miR-450a-5p                |
| MIMAT0021018    | 2.11E-10 | 2.28E-11 | 7.27 | 15.2 | 2.538 | hsa-miR-4999-3p                |
| MIMAT0022302    | 2.74E-06 | 7.90E-07 | 5.17 | 5.03 | 2.535 | hsa-miR-5591-3p                |
| MIMAT0005916    | 6.28E-10 | 7.85E-11 | 7.04 | 14   | 2.531 | hsa-miR-548n                   |
| MIMAT0026737    | 5.81E-08 | 1.16E-08 | 6.07 | 9.13 | 2.53  | hsa-miR-548j-3p                |
| MIMAT0027628    | 1.86E-06 | 5.15E-07 | 5.26 | 5.44 | 2.529 | hsa-miR-6864-5p                |
| MIMAT0004921    | 1.39E-10 | 1.43E-11 | 7.36 | 15.7 | 2.528 | hsa-miR-889-3p                 |
| MIMAT0003292    | 1.14E-08 | 1.97E-09 | 6.42 | 10.9 | 2.525 | hsa-miR-623                    |
| MIMAT0025480    | 2.90E-09 | 4.31E-10 | 6.71 | 12.3 | 2.52  | hsa-miR-6512-5p                |
| MIMAT0003225    | 5.71E-10 | 6.99E-11 | 7.06 | 14.1 | 2.515 | hsa-miR-561-3p                 |
| MIMAT0019925    | 1.75E-05 | 5.95E-06 | 4.71 | 3.08 | 2.513 | hsa-miR-4771                   |
| MIMAT0005912    | 2.00E-06 | 5.56E-07 | 5.25 | 5.37 | 2.511 | hsa-miR-548g-3p                |
| MIMAT0019963    | 1.51E-07 | 3.27E-08 | 5.85 | 8.12 | 2.511 | hsa-miR-4791                   |
| MIMAT0030989    | 4.25E-07 | 1.00E-07 | 5.62 | 7.03 | 2.51  | hsa-miR-8062                   |
| MIMAT0018447, N | 3.31E-08 | 6.32E-09 | 6.19 | 9.72 | 2.505 | hsa-miR-548aa, hsa-miR-548t-3p |
| MIMAT0005885    | 4.65E-06 | 1.40E-06 | 5.04 | 4.48 | 2.504 | hsa-miR-1295a                  |
| MIMAT0019361    | 6.85E-06 | 2.16E-06 | 4.94 | 4.06 | 2.504 | hsa-miR-3976                   |
| MIMAT0015044    | 1.38E-07 | 2.94E-08 | 5.87 | 8.22 | 2.503 | hsa-miR-3169                   |
| MIMAT0002833    | 2.20E-05 | 7.76E-06 | 4.64 | 2.83 | 2.502 | hsa-miR-520a-5p                |
| MIMAT0011156    | 3.86E-07 | 9.05E-08 | 5.64 | 7.13 | 2.502 | hsa-miR-2114-5p                |
| MIMAT0021019    | 1.95E-09 | 2.78E-10 | 6.8  | 12.8 | 2.501 | hsa-miR-5000-5p                |
| MIMAT0018946    | 1.05E-09 | 1.40E-10 | 6.93 | 13.5 | 2.501 | hsa-miR-548ad-3p               |
| MIMAT0019931    | 5.80E-11 | 5.18E-12 | 7.54 | 16.7 | 2.499 | hsa-miR-4775                   |
| MIMAT0015045    | 1.53E-06 | 4.16E-07 | 5.31 | 5.65 | 2.498 | hsa-miR-3170                   |
| MIMAT0014991    | 1.56E-09 | 2.16E-10 | 6.85 | 13   | 2.495 | hsa-miR-3128                   |
| MIMAT0016879    | 2.28E-38 | 2.72E-41 | 19.3 | 83.3 | 2.493 | hsa-miR-4258                   |
| MIMAT0018353    | 2.08E-06 | 5.80E-07 | 5.24 | 5.33 | 2.492 | hsa-miR-3938                   |
| MIMAT0004613    | 6.42E-06 | 2.01E-06 | 4.96 | 4.13 | 2.491 | hsa-miR-188-3p                 |
| MIMAT0000763    | 4.77E-06 | 1.44E-06 | 5.03 | 4.45 | 2.483 | hsa-miR-338-3p                 |
| MIMAT0004553    | 6.94E-07 | 1.76E-07 | 5.5  | 6.48 | 2.473 | hsa-miR-7-1-3p                 |
| MIMAT0019910    | 8.02E-06 | 2.54E-06 | 4.91 | 3.9  | 2.471 | hsa-miR-4762-5p                |
| MIMAT0000422    | 6.66E-06 | 2.09E-06 | 4.95 | 4.09 | 2.47  | hsa-miR-124-3p                 |
| MIMAT0005894    | 1.37E-08 | 2.41E-09 | 6.38 | 10.7 | 2.469 | hsa-miR-1243                   |
| MIMAT0022469    | 1.42E-07 | 3.03E-08 | 5.87 | 8.19 | 2.468 | hsa-miR-5681a                  |
| MIMAT0022470    | 1.17E-08 | 2.04E-09 | 6.41 | 10.8 | 2.468 | hsa-miR-5682                   |
| MIMAT0020300    | 9.02E-07 | 2.33E-07 | 5.44 | 6.21 | 2.467 | hsa-miR-4520-2-3p              |
| MIMAT0004922    | 6.22E-11 | 5.65E-12 | 7.53 | 16.6 | 2.467 | hsa-miR-875-5p                 |

|              |          |          |      |      |       |                   |
|--------------|----------|----------|------|------|-------|-------------------|
| MIMAT0004765 | 5.34E-07 | 1.31E-07 | 5.56 | 6.77 | 2.466 | hsa-miR-491-3p    |
| MIMAT0003164 | 2.08E-07 | 4.65E-08 | 5.78 | 7.78 | 2.462 | hsa-miR-544a      |
| MIMAT0002863 | 8.42E-06 | 2.68E-06 | 4.89 | 3.85 | 2.459 | hsa-miR-518a-3p   |
| MIMAT0027646 | 4.01E-06 | 1.19E-06 | 5.08 | 4.63 | 2.458 | hsa-miR-6873-5p   |
| MIMAT0014977 | 4.00E-10 | 4.64E-11 | 7.14 | 14.5 | 2.458 | hsa-miR-3115      |
| MIMAT0005799 | 4.69E-07 | 1.13E-07 | 5.59 | 6.91 | 2.457 | hsa-miR-1283      |
| MIMAT0019796 | 6.04E-06 | 1.88E-06 | 4.97 | 4.19 | 2.457 | hsa-miR-4700-5p   |
| MIMAT0009979 | 2.48E-07 | 5.64E-08 | 5.74 | 7.59 | 2.456 | hsa-miR-2054      |
| MIMAT0002856 | 1.28E-05 | 4.22E-06 | 4.79 | 3.41 | 2.455 | hsa-miR-520d-3p   |
| MIMAT0004948 | 1.16E-21 | 1.54E-23 | 12.1 | 42.9 | 2.455 | hsa-miR-885-3p    |
| MIMAT0017990 | 1.09E-10 | 1.08E-11 | 7.41 | 16   | 2.455 | hsa-miR-3613-5p   |
| MIMAT0014978 | 1.37E-06 | 3.69E-07 | 5.34 | 5.76 | 2.452 | hsa-miR-3116      |
| MIMAT0019864 | 3.53E-06 | 1.04E-06 | 5.11 | 4.76 | 2.451 | hsa-miR-3064-5p   |
| MIMAT0019972 | 1.35E-05 | 4.50E-06 | 4.77 | 3.35 | 2.45  | hsa-miR-4797-5p   |
| MIMAT0000510 | 5.25E-22 | 6.34E-24 | 12.3 | 43.8 | 2.449 | hsa-miR-320a      |
| MIMAT0019746 | 5.12E-06 | 1.55E-06 | 5.02 | 4.37 | 2.449 | hsa-miR-4668-3p   |
| MIMAT0000415 | 4.38E-06 | 1.31E-06 | 5.06 | 4.54 | 2.447 | hsa-let-7i-5p     |
| MIMAT0019360 | 1.06E-07 | 2.23E-08 | 5.93 | 8.49 | 2.447 | hsa-miR-3975      |
| MIMAT0018355 | 1.82E-08 | 3.29E-09 | 6.32 | 10.4 | 2.446 | hsa-miR-3939      |
| MIMAT0004924 | 6.73E-07 | 1.69E-07 | 5.51 | 6.52 | 2.445 | hsa-miR-876-5p    |
| MIMAT0015000 | 7.17E-08 | 1.47E-08 | 6.02 | 8.9  | 2.441 | hsa-miR-3134      |
| MIMAT0019896 | 1.13E-04 | 4.76E-05 | 4.2  | 1.09 | 2.438 | hsa-miR-4755-3p   |
| MIMAT0019765 | 6.53E-07 | 1.63E-07 | 5.51 | 6.56 | 2.436 | hsa-miR-4680-3p   |
| MIMAT0026626 | 9.52E-08 | 1.99E-08 | 5.95 | 8.61 | 2.436 | hsa-miR-655-5p    |
| MIMAT0004960 | 2.87E-06 | 8.31E-07 | 5.16 | 4.98 | 2.435 | hsa-miR-208b-3p   |
| MIMAT0030424 | 3.36E-06 | 9.88E-07 | 5.12 | 4.81 | 2.434 | hsa-miR-7849-3p   |
| MIMAT0003165 | 6.48E-07 | 1.61E-07 | 5.52 | 6.57 | 2.433 | hsa-miR-545-3p    |
| MIMAT0001635 | 1.14E-05 | 3.73E-06 | 4.82 | 3.53 | 2.433 | hsa-miR-452-5p    |
| MIMAT0019895 | 6.71E-07 | 1.68E-07 | 5.51 | 6.53 | 2.432 | hsa-miR-4755-5p   |
| MIMAT0000433 | 3.02E-05 | 1.10E-05 | 4.56 | 2.49 | 2.431 | hsa-miR-142-5p    |
| MIMAT0004599 | 9.96E-07 | 2.59E-07 | 5.41 | 6.11 | 2.428 | hsa-miR-143-5p    |
| MIMAT0000721 | 1.67E-05 | 5.67E-06 | 4.72 | 3.13 | 2.426 | hsa-miR-369-3p    |
| MIMAT0004785 | 6.91E-07 | 1.74E-07 | 5.5  | 6.49 | 2.425 | hsa-miR-545-5p    |
| MIMAT0022300 | 4.29E-08 | 8.40E-09 | 6.13 | 9.45 | 2.422 | hsa-miR-5590-3p   |
| MIMAT0018186 | 1.42E-10 | 1.48E-11 | 7.35 | 15.7 | 2.42  | hsa-miR-3912-3p   |
| MIMAT0026719 | 9.51E-06 | 3.05E-06 | 4.86 | 3.72 | 2.42  | hsa-miR-889-5p    |
| MIMAT0015011 | 5.23E-06 | 1.60E-06 | 5.01 | 4.35 | 2.419 | hsa-miR-3142      |
| MIMAT0019823 | 4.30E-07 | 1.02E-07 | 5.61 | 7.01 | 2.419 | hsa-miR-4714-3p   |
| MIMAT0004567 | 4.91E-07 | 1.19E-07 | 5.58 | 6.86 | 2.419 | hsa-miR-219a-1-3p |
| MIMAT0014987 | 5.51E-05 | 2.12E-05 | 4.4  | 1.86 | 2.416 | hsa-miR-548s      |
| MIMAT0003284 | 2.68E-06 | 7.70E-07 | 5.18 | 5.05 | 2.416 | hsa-miR-616-5p    |
| MIMAT0002813 | 5.12E-06 | 1.56E-06 | 5.02 | 4.37 | 2.415 | hsa-miR-493-5p    |
| MIMAT0019728 | 1.79E-06 | 4.90E-07 | 5.28 | 5.49 | 2.413 | hsa-miR-4660      |
| MIMAT0005955 | 2.85E-08 | 5.38E-09 | 6.22 | 9.88 | 2.411 | hsa-miR-1197      |
| MIMAT0021030 | 1.22E-06 | 3.25E-07 | 5.37 | 5.89 | 2.41  | hsa-miR-548ao-3p  |
| MIMAT0005798 | 7.75E-08 | 1.60E-08 | 6    | 8.82 | 2.406 | hsa-miR-1185-5p   |
| MIMAT0004974 | 1.10E-08 | 1.89E-09 | 6.43 | 10.9 | 2.405 | hsa-miR-924       |
| MIMAT0019784 | 2.00E-09 | 2.86E-10 | 6.79 | 12.8 | 2.401 | hsa-miR-4693-5p   |
| MIMAT0027036 | 4.46E-07 | 1.06E-07 | 5.61 | 6.98 | 2.401 | hsa-miR-3912-5p   |
| MIMAT0005944 | 7.89E-07 | 2.02E-07 | 5.47 | 6.35 | 2.401 | hsa-miR-1252-5p   |
| MIMAT0001340 | 2.25E-08 | 4.14E-09 | 6.27 | 10.1 | 2.398 | hsa-miR-423-3p    |
| MIMAT0019934 | 1.68E-07 | 3.64E-08 | 5.83 | 8.02 | 2.398 | hsa-miR-4777-5p   |
| MIMAT0028233 | 3.00E-06 | 8.73E-07 | 5.15 | 4.93 | 2.396 | hsa-miR-7161-3p   |
| MIMAT0022271 | 1.69E-07 | 3.69E-08 | 5.83 | 8    | 2.396 | hsa-miR-664b-5p   |
| MIMAT0027410 | 3.04E-09 | 4.60E-10 | 6.7  | 12.3 | 2.394 | hsa-miR-6755-5p   |
| MIMAT0019898 | 6.18E-06 | 1.93E-06 | 4.97 | 4.17 | 2.392 | hsa-miR-499b-3p   |
| MIMAT0016861 | 1.31E-06 | 3.52E-07 | 5.35 | 5.81 | 2.39  | hsa-miR-4308      |
| MIMAT0003259 | 2.22E-06 | 6.24E-07 | 5.22 | 5.26 | 2.39  | hsa-miR-591       |

|              |          |          |      |      |       |                  |
|--------------|----------|----------|------|------|-------|------------------|
| MIMAT0018963 | 7.51E-05 | 3.02E-05 | 4.31 | 1.52 | 2.388 | hsa-miR-4445-5p  |
| MIMAT0000091 | 1.83E-05 | 6.30E-06 | 4.69 | 3.03 | 2.385 | hsa-miR-33a-5p   |
| MIMAT0000441 | 2.14E-05 | 7.51E-06 | 4.65 | 2.86 | 2.382 | hsa-miR-9-5p     |
| MIMAT0000100 | 3.77E-05 | 1.41E-05 | 4.5  | 2.25 | 2.381 | hsa-miR-29b-3p   |
| MIMAT0002876 | 1.80E-05 | 6.18E-06 | 4.7  | 3.04 | 2.381 | hsa-miR-505-3p   |
| MIMAT0004764 | 1.31E-06 | 3.50E-07 | 5.35 | 5.82 | 2.38  | hsa-miR-490-5p   |
| MIMAT0019212 | 4.27E-08 | 8.33E-09 | 6.13 | 9.45 | 2.379 | hsa-miR-3160-5p  |
| MIMAT0031176 | 5.18E-06 | 1.58E-06 | 5.01 | 4.36 | 2.377 | hsa-miR-7973     |
| MIMAT0015013 | 4.85E-09 | 7.84E-10 | 6.6  | 11.8 | 2.375 | hsa-miR-548u     |
| MIMAT0004929 | 3.71E-07 | 8.66E-08 | 5.65 | 7.17 | 2.374 | hsa-miR-190b     |
| MIMAT0021086 | 6.66E-06 | 2.09E-06 | 4.95 | 4.09 | 2.374 | hsa-miR-5094     |
| MIMAT0030992 | 6.94E-07 | 1.76E-07 | 5.5  | 6.48 | 2.374 | hsa-miR-8065     |
| MIMAT0006767 | 2.74E-07 | 6.30E-08 | 5.72 | 7.48 | 2.372 | hsa-miR-1827     |
| MIMAT0018357 | 1.80E-08 | 3.24E-09 | 6.32 | 10.4 | 2.371 | hsa-miR-3941     |
| MIMAT0000416 | 1.25E-05 | 4.11E-06 | 4.79 | 3.44 | 2.37  | hsa-miR-1-3p     |
| MIMAT0019891 | 1.07E-08 | 1.84E-09 | 6.43 | 10.9 | 2.364 | hsa-miR-4753-3p  |
| MIMAT0015033 | 8.39E-06 | 2.67E-06 | 4.89 | 3.85 | 2.362 | hsa-miR-3159     |
| MIMAT0019714 | 1.91E-05 | 6.64E-06 | 4.68 | 2.98 | 2.362 | hsa-miR-4650-3p  |
| MIMAT0005897 | 2.00E-05 | 6.97E-06 | 4.67 | 2.93 | 2.359 | hsa-miR-1245a    |
| MIMAT0019071 | 3.20E-33 | 1.25E-35 | 16.9 | 70.5 | 2.359 | hsa-miR-4532     |
| MIMAT0019016 | 9.65E-09 | 1.64E-09 | 6.45 | 11   | 2.358 | hsa-miR-4482-5p  |
| MIMAT0018201 | 3.03E-06 | 8.82E-07 | 5.15 | 4.92 | 2.358 | hsa-miR-3926     |
| MIMAT0022498 | 3.18E-06 | 9.30E-07 | 5.13 | 4.87 | 2.357 | hsa-miR-5704     |
| MIMAT0022277 | 2.09E-07 | 4.69E-08 | 5.78 | 7.77 | 2.357 | hsa-miR-548at-5p |
| MIMAT0019220 | 2.37E-07 | 5.35E-08 | 5.75 | 7.64 | 2.356 | hsa-miR-3664-3p  |
| MIMAT0018973 | 7.35E-06 | 2.32E-06 | 4.93 | 3.99 | 2.352 | hsa-miR-4451     |
| MIMAT0019067 | 1.77E-05 | 6.04E-06 | 4.7  | 3.07 | 2.351 | hsa-miR-4528     |
| MIMAT0019734 | 2.65E-07 | 6.07E-08 | 5.72 | 7.52 | 2.35  | hsa-miR-4659b-3p |
| MIMAT0016848 | 6.61E-06 | 2.07E-06 | 4.95 | 4.1  | 2.349 | hsa-miR-4293     |
| MIMAT0000714 | 2.70E-05 | 9.75E-06 | 4.59 | 2.61 | 2.345 | hsa-miR-302b-5p  |
| MIMAT0018954 | 4.56E-07 | 1.09E-07 | 5.6  | 6.95 | 2.345 | hsa-miR-548ae-3p |
| MIMAT0019062 | 2.96E-06 | 8.59E-07 | 5.15 | 4.95 | 2.344 | hsa-miR-4524a-5p |
| MIMAT0016853 | 2.16E-06 | 6.03E-07 | 5.23 | 5.29 | 2.341 | hsa-miR-4300     |
| MIMAT0005886 | 5.18E-07 | 1.27E-07 | 5.57 | 6.8  | 2.341 | hsa-miR-1297     |
| MIMAT0019977 | 2.58E-07 | 5.89E-08 | 5.73 | 7.55 | 2.34  | hsa-miR-4799-3p  |
| MIMAT0019013 | 7.04E-08 | 1.43E-08 | 6.02 | 8.92 | 2.339 | hsa-miR-548ak    |
| MIMAT0016903 | 2.59E-05 | 9.30E-06 | 4.6  | 2.65 | 2.338 | hsa-miR-4273     |
| MIMAT0014985 | 7.56E-07 | 1.93E-07 | 5.48 | 6.39 | 2.336 | hsa-miR-3123     |
| MIMAT0005896 | 1.97E-08 | 3.60E-09 | 6.3  | 10.3 | 2.336 | hsa-miR-1244     |
| MIMAT0018203 | 1.86E-06 | 5.15E-07 | 5.26 | 5.44 | 2.332 | hsa-miR-676-5p   |
| MIMAT0030981 | 1.26E-05 | 4.13E-06 | 4.79 | 3.43 | 2.329 | hsa-miR-8054     |
| MIMAT0004512 | 4.18E-06 | 1.25E-06 | 5.07 | 4.59 | 2.328 | hsa-miR-100-3p   |
| MIMAT0022468 | 2.53E-07 | 5.77E-08 | 5.73 | 7.57 | 2.327 | hsa-miR-5680     |
| MIMAT0002875 | 1.35E-05 | 4.49E-06 | 4.77 | 3.35 | 2.327 | hsa-miR-504-5p   |
| MIMAT0027517 | 2.50E-06 | 7.14E-07 | 5.19 | 5.13 | 2.326 | hsa-miR-6808-3p  |
| MIMAT0000445 | 1.17E-04 | 4.94E-05 | 4.19 | 1.06 | 2.325 | hsa-miR-126-3p   |
| MIMAT0025469 | 5.76E-06 | 1.79E-06 | 4.99 | 4.24 | 2.323 | hsa-miR-6506-3p  |
| MIMAT0019943 | 1.12E-08 | 1.93E-09 | 6.42 | 10.9 | 2.323 | hsa-miR-4781-3p  |
| MIMAT0000680 | 6.81E-05 | 2.70E-05 | 4.34 | 1.63 | 2.323 | hsa-miR-106b-5p  |
| MIMAT0004510 | 5.77E-06 | 1.79E-06 | 4.99 | 4.24 | 2.322 | hsa-miR-96-3p    |
| MIMAT0000737 | 3.36E-05 | 1.24E-05 | 4.53 | 2.38 | 2.321 | hsa-miR-382-5p   |
| MIMAT0020541 | 3.91E-08 | 7.57E-09 | 6.15 | 9.55 | 2.321 | hsa-miR-5047     |
| MIMAT0021045 | 1.35E-05 | 4.50E-06 | 4.77 | 3.35 | 2.32  | hsa-miR-5011-5p  |
| MIMAT0000681 | 8.20E-05 | 3.33E-05 | 4.29 | 1.43 | 2.318 | hsa-miR-29c-3p   |
| MIMAT0016905 | 1.41E-05 | 4.71E-06 | 4.76 | 3.3  | 2.317 | hsa-miR-4275     |
| MIMAT0004923 | 4.70E-06 | 1.42E-06 | 5.04 | 4.46 | 2.312 | hsa-miR-875-3p   |
| MIMAT0003386 | 9.99E-07 | 2.60E-07 | 5.41 | 6.1  | 2.31  | hsa-miR-376a-5p  |
| MIMAT0022924 | 2.12E-07 | 4.76E-08 | 5.77 | 7.75 | 2.308 | hsa-miR-495-5p   |

|                 |          |          |      |      |       |                                                         |
|-----------------|----------|----------|------|------|-------|---------------------------------------------------------|
| MIMAT0001625    | 2.40E-05 | 8.55E-06 | 4.62 | 2.73 | 2.308 | hsa-miR-431-5p                                          |
| MIMAT0022292    | 9.37E-08 | 1.95E-08 | 5.96 | 8.62 | 2.307 | hsa-miR-548au-3p                                        |
| MIMAT0004568    | 2.33E-08 | 4.31E-09 | 6.26 | 10.1 | 2.3   | hsa-miR-221-5p                                          |
| MIMAT0001412    | 1.93E-04 | 8.63E-05 | 4.04 | 0.52 | 2.3   | hsa-miR-18b-5p                                          |
| MIMAT0004612    | 8.96E-06 | 2.87E-06 | 4.88 | 3.78 | 2.299 | hsa-miR-186-3p                                          |
| MIMAT0016850    | 5.28E-06 | 1.62E-06 | 5.01 | 4.34 | 2.298 | hsa-miR-4301                                            |
| MIMAT0019876    | 1.67E-04 | 7.36E-05 | 4.09 | 0.68 | 2.297 | hsa-miR-3591-5p                                         |
| MIMAT0011160    | 1.06E-06 | 2.79E-07 | 5.4  | 6.04 | 2.297 | hsa-miR-2116-5p                                         |
| MIMAT0003265    | 1.80E-05 | 6.16E-06 | 4.7  | 3.05 | 2.297 | hsa-miR-597-5p                                          |
| MIMAT0027435    | 8.80E-07 | 2.27E-07 | 5.44 | 6.24 | 2.297 | hsa-miR-6767-3p                                         |
| MIMAT0004513    | 1.35E-05 | 4.50E-06 | 4.77 | 3.35 | 2.296 | hsa-miR-101-5p                                          |
| MIMAT0003301    | 5.78E-05 | 2.23E-05 | 4.39 | 1.81 | 2.295 | hsa-miR-33b-5p                                          |
| MIMAT0022299    | 1.53E-06 | 4.15E-07 | 5.31 | 5.65 | 2.294 | hsa-miR-5590-5p                                         |
| MIMAT0018108    | 1.20E-06 | 3.18E-07 | 5.37 | 5.91 | 2.292 | hsa-miR-3681-5p                                         |
| MIMAT0027534    | 5.39E-06 | 1.65E-06 | 5    | 4.31 | 2.29  | hsa-miR-6817-5p                                         |
| MIMAT0019900    | 8.96E-06 | 2.86E-06 | 4.88 | 3.79 | 2.286 | hsa-miR-4756-3p                                         |
| MIMAT0000077    | 1.86E-05 | 6.41E-06 | 4.69 | 3.01 | 2.285 | hsa-miR-22-3p                                           |
| MIMAT0018957    | 7.56E-07 | 1.93E-07 | 5.48 | 6.39 | 2.282 | hsa-miR-4439                                            |
| MIMAT0003318    | 1.32E-05 | 4.36E-06 | 4.78 | 3.38 | 2.282 | hsa-miR-648                                             |
| MIMAT0003216    | 5.28E-06 | 1.62E-06 | 5.01 | 4.34 | 2.282 | hsa-miR-553                                             |
| MIMAT0000439    | 1.15E-05 | 3.74E-06 | 4.82 | 3.53 | 2.282 | hsa-miR-153-3p                                          |
| MIMAT0000759    | 6.92E-05 | 2.74E-05 | 4.34 | 1.62 | 2.281 | hsa-miR-148b-3p                                         |
| MIMAT0004796    | 1.28E-08 | 2.25E-09 | 6.39 | 10.7 | 2.279 | hsa-miR-576-3p                                          |
| MIMAT0005887    | 2.73E-05 | 9.86E-06 | 4.59 | 2.6  | 2.277 | hsa-miR-1299                                            |
| MIMAT0018190    | 1.09E-06 | 2.85E-07 | 5.39 | 6.02 | 2.276 | hsa-miR-3916                                            |
| MIMAT0019697    | 5.54E-06 | 1.71E-06 | 5    | 4.28 | 2.274 | hsa-miR-4639-5p                                         |
| MIMAT0019019    | 5.39E-05 | 2.06E-05 | 4.41 | 1.89 | 2.273 | hsa-miR-4485-3p                                         |
| MIMAT0000087    | 6.26E-05 | 2.45E-05 | 4.36 | 1.72 | 2.272 | hsa-miR-30a-5p                                          |
| MIMAT0003282    | 6.97E-19 | 1.55E-20 | 10.9 | 36.1 | 2.271 | hsa-miR-614                                             |
| MIMAT0018354    | 8.11E-08 | 1.68E-08 | 5.99 | 8.77 | 2.271 | hsa-miR-548y                                            |
| MIMAT0019907    | 6.68E-07 | 1.67E-07 | 5.51 | 6.53 | 2.27  | hsa-miR-4760-3p                                         |
| MIMAT0004777    | 6.82E-06 | 2.15E-06 | 4.94 | 4.06 | 2.267 | hsa-miR-513a-3p                                         |
| MIMAT0015025    | 4.73E-06 | 1.43E-06 | 5.04 | 4.46 | 2.265 | hsa-miR-3152-3p                                         |
| MIMAT0019228    | 4.05E-07 | 9.53E-08 | 5.63 | 7.08 | 2.263 | hsa-miR-3925-3p                                         |
| MIMAT0004556    | 1.93E-07 | 4.28E-08 | 5.8  | 7.86 | 2.263 | hsa-miR-10b-3p                                          |
| MIMAT0000685    | 1.46E-05 | 4.90E-06 | 4.75 | 3.27 | 2.262 | hsa-miR-34b-5p                                          |
| MIMAT0019794    | 5.92E-05 | 2.31E-05 | 4.38 | 1.78 | 2.262 | hsa-miR-4699-5p                                         |
| MIMAT0025473    | 2.17E-06 | 6.07E-07 | 5.23 | 5.28 | 2.256 | hsa-miR-6508-3p                                         |
| MIMAT0018117, N | 5.31E-08 | 1.05E-08 | 6.09 | 9.23 | 2.256 | hsa-miR-3689a-5p,<br>hsa-miR-3689b-5p,<br>hsa-miR-3689e |
| MIMAT0004987    | 1.38E-04 | 5.92E-05 | 4.14 | 0.88 | 2.251 | hsa-miR-944                                             |
| MIMAT0018974    | 1.96E-07 | 4.36E-08 | 5.79 | 7.84 | 2.25  | hsa-miR-4452                                            |
| MIMAT0022471    | 1.50E-08 | 2.67E-09 | 6.36 | 10.6 | 2.248 | hsa-miR-548aw                                           |
| MIMAT0005935    | 5.95E-08 | 1.19E-08 | 6.06 | 9.11 | 2.24  | hsa-miR-548i                                            |
| MIMAT0000267    | 3.33E-12 | 2.17E-13 | 8.12 | 19.8 | 2.239 | hsa-miR-210-3p                                          |
| MIMAT0026615    | 1.57E-05 | 5.30E-06 | 4.73 | 3.19 | 2.236 | hsa-miR-552-5p                                          |
| MIMAT0019945    | 3.68E-06 | 1.09E-06 | 5.1  | 4.72 | 2.236 | hsa-miR-4782-3p                                         |
| MIMAT0022291    | 3.83E-09 | 6.03E-10 | 6.65 | 12   | 2.236 | hsa-miR-548au-5p                                        |
| MIMAT0001080    | 1.90E-05 | 6.58E-06 | 4.68 | 2.98 | 2.232 | hsa-miR-196b-5p                                         |
| MIMAT0026609    | 1.31E-05 | 4.31E-06 | 4.78 | 3.39 | 2.232 | hsa-miR-520f-5p                                         |
| MIMAT0018000    | 3.87E-05 | 1.45E-05 | 4.49 | 2.23 | 2.231 | hsa-miR-23c                                             |
| MIMAT0000761    | 2.20E-05 | 7.76E-06 | 4.64 | 2.83 | 2.229 | hsa-miR-324-5p                                          |
| MIMAT0005870    | 7.93E-07 | 2.04E-07 | 5.47 | 6.34 | 2.229 | hsa-miR-1206                                            |
| MIMAT0004763    | 1.07E-06 | 2.80E-07 | 5.4  | 6.03 | 2.229 | hsa-miR-488-3p                                          |
| MIMAT0000729    | 1.24E-04 | 5.29E-05 | 4.17 | 0.99 | 2.229 | hsa-miR-376a-3p                                         |
| MIMAT0022978    | 5.43E-06 | 1.67E-06 | 5    | 4.3  | 2.225 | hsa-miR-4743-3p                                         |
| MIMAT0003232    | 1.59E-05 | 5.36E-06 | 4.73 | 3.18 | 2.22  | hsa-miR-568                                             |

|              |          |          |      |      |       |                   |
|--------------|----------|----------|------|------|-------|-------------------|
| MIMAT0026739 | 1.83E-06 | 5.02E-07 | 5.27 | 5.47 | 2.22  | hsa-miR-548f-5p   |
| MIMAT0003339 | 5.73E-06 | 1.77E-06 | 4.99 | 4.25 | 2.218 | hsa-miR-421       |
| MIMAT0018193 | 1.21E-04 | 5.13E-05 | 4.18 | 1.02 | 2.217 | hsa-miR-3919      |
| MIMAT0003267 | 4.02E-05 | 1.52E-05 | 4.48 | 2.18 | 2.216 | hsa-miR-599       |
| MIMAT0004600 | 2.68E-07 | 6.17E-08 | 5.72 | 7.5  | 2.214 | hsa-miR-144-5p    |
| MIMAT0019802 | 1.59E-06 | 4.33E-07 | 5.3  | 5.61 | 2.214 | hsa-miR-4703-3p   |
| MIMAT0004675 | 1.76E-05 | 6.01E-06 | 4.71 | 3.07 | 2.211 | hsa-miR-219a-2-3p |
| MIMAT0019235 | 3.53E-05 | 1.31E-05 | 4.52 | 2.32 | 2.211 | hsa-miR-4520-5p   |
| MIMAT0022923 | 1.00E-08 | 1.71E-09 | 6.45 | 11   | 2.211 | hsa-miR-376b-5p   |
| MIMAT0003242 | 3.34E-05 | 1.23E-05 | 4.53 | 2.38 | 2.208 | hsa-miR-577       |
| MIMAT0017995 | 4.93E-07 | 1.20E-07 | 5.58 | 6.85 | 2.206 | hsa-miR-3616-5p   |
| MIMAT0004514 | 8.49E-05 | 3.46E-05 | 4.28 | 1.39 | 2.205 | hsa-miR-29b-1-5p  |
| MIMAT0003235 | 7.04E-06 | 2.22E-06 | 4.94 | 4.03 | 2.202 | hsa-miR-570-3p    |
| MIMAT0001629 | 1.18E-04 | 5.01E-05 | 4.18 | 1.04 | 2.2   | hsa-miR-329-3p    |
| MIMAT0000270 | 8.63E-05 | 3.54E-05 | 4.27 | 1.37 | 2.199 | hsa-miR-181a-3p   |
| MIMAT0019952 | 2.93E-06 | 8.49E-07 | 5.15 | 4.96 | 2.198 | hsa-miR-2467-5p   |
| MIMAT0019834 | 1.11E-06 | 2.92E-07 | 5.39 | 5.99 | 2.197 | hsa-miR-4720-3p   |
| MIMAT0019694 | 1.56E-04 | 6.79E-05 | 4.11 | 0.75 | 2.194 | hsa-miR-4637      |
| MIMAT0018098 | 6.51E-07 | 1.62E-07 | 5.52 | 6.56 | 2.193 | hsa-miR-3675-5p   |
| MIMAT0021017 | 3.51E-07 | 8.19E-08 | 5.66 | 7.23 | 2.192 | hsa-miR-4999-5p   |
| MIMAT0019897 | 1.15E-06 | 3.03E-07 | 5.38 | 5.96 | 2.192 | hsa-miR-499b-5p   |
| MIMAT0019030 | 1.76E-07 | 3.87E-08 | 5.82 | 7.96 | 2.192 | hsa-miR-4495      |
| MIMAT0024612 | 4.09E-06 | 1.22E-06 | 5.07 | 4.61 | 2.191 | hsa-miR-378j      |
| MIMAT0000088 | 3.59E-05 | 1.33E-05 | 4.51 | 2.31 | 2.191 | hsa-miR-30a-3p    |
| MIMAT0018116 | 4.62E-07 | 1.11E-07 | 5.6  | 6.93 | 2.191 | hsa-miR-3688-3p   |
| MIMAT0000734 | 2.67E-05 | 9.62E-06 | 4.59 | 2.62 | 2.188 | hsa-miR-380-5p    |
| MIMAT0016880 | 5.21E-11 | 4.53E-12 | 7.57 | 16.8 | 2.188 | hsa-miR-4259      |
| MIMAT0022481 | 6.22E-06 | 1.95E-06 | 4.97 | 4.16 | 2.182 | hsa-miR-5689      |
| MIMAT0019002 | 9.19E-05 | 3.78E-05 | 4.26 | 1.31 | 2.181 | hsa-miR-4475      |
| MIMAT0019222 | 4.61E-05 | 1.76E-05 | 4.45 | 2.04 | 2.174 | hsa-miR-3682-5p   |
| MIMAT0022478 | 1.39E-05 | 4.63E-06 | 4.77 | 3.32 | 2.173 | hsa-miR-5687      |
| MIMAT0021122 | 5.83E-05 | 2.26E-05 | 4.39 | 1.8  | 2.171 | hsa-miR-5191      |
| MIMAT0004975 | 4.27E-05 | 1.62E-05 | 4.47 | 2.12 | 2.17  | hsa-miR-509-3-5p  |
| MIMAT0004798 | 7.83E-07 | 2.01E-07 | 5.47 | 6.36 | 2.169 | hsa-miR-548b-5p   |
| MIMAT0018086 | 1.99E-05 | 6.93E-06 | 4.67 | 2.93 | 2.169 | hsa-miR-3664-5p   |
| MIMAT0003163 | 2.15E-05 | 7.53E-06 | 4.65 | 2.85 | 2.166 | hsa-miR-539-5p    |
| MIMAT0000438 | 5.88E-05 | 2.28E-05 | 4.38 | 1.79 | 2.166 | hsa-miR-152-3p    |
| MIMAT0000256 | 3.25E-05 | 1.19E-05 | 4.54 | 2.41 | 2.166 | hsa-miR-181a-5p   |
| MIMAT0019000 | 2.27E-05 | 8.04E-06 | 4.64 | 2.79 | 2.164 | hsa-miR-4473      |
| MIMAT0019057 | 2.27E-06 | 6.42E-07 | 5.22 | 5.23 | 2.164 | hsa-miR-4520-3p   |
| MIMAT0005828 | 4.62E-07 | 1.10E-07 | 5.6  | 6.94 | 2.164 | hsa-miR-1183      |
| MIMAT0022264 | 2.32E-05 | 8.23E-06 | 4.63 | 2.77 | 2.164 | hsa-miR-548aq-3p  |
| MIMAT0027643 | 2.97E-06 | 8.63E-07 | 5.15 | 4.94 | 2.163 | hsa-miR-6871-3p   |
| MIMAT0031000 | 4.41E-36 | 8.60E-39 | 18.2 | 77.6 | 2.16  | hsa-miR-8073      |
| MIMAT0004813 | 1.18E-05 | 3.87E-06 | 4.81 | 3.5  | 2.158 | hsa-miR-411-3p    |
| MIMAT0003277 | 2.47E-05 | 8.81E-06 | 4.61 | 2.7  | 2.158 | hsa-miR-609       |
| MIMAT0003281 | 8.96E-06 | 2.87E-06 | 4.88 | 3.78 | 2.156 | hsa-miR-613       |
| MIMAT0003886 | 5.47E-05 | 2.10E-05 | 4.4  | 1.87 | 2.156 | hsa-miR-769-5p    |
| MIMAT0022701 | 1.18E-04 | 4.97E-05 | 4.19 | 1.05 | 2.154 | hsa-miR-506-5p    |
| MIMAT0004928 | 1.37E-05 | 4.55E-06 | 4.77 | 3.34 | 2.152 | hsa-miR-147b      |
| MIMAT0005900 | 6.09E-05 | 2.38E-05 | 4.37 | 1.75 | 2.152 | hsa-miR-1248      |
| MIMAT0004814 | 1.28E-05 | 4.21E-06 | 4.79 | 3.41 | 2.151 | hsa-miR-654-3p    |
| MIMAT0004185 | 1.13E-05 | 3.68E-06 | 4.82 | 3.54 | 2.151 | hsa-miR-802       |
| MIMAT0018941 | 9.07E-06 | 2.91E-06 | 4.87 | 3.77 | 2.15  | hsa-miR-4426      |
| MIMAT0019920 | 1.01E-05 | 3.24E-06 | 4.85 | 3.67 | 2.149 | hsa-miR-4768-5p   |
| MIMAT0000727 | 7.41E-05 | 2.97E-05 | 4.32 | 1.54 | 2.146 | hsa-miR-374a-5p   |
| MIMAT0004557 | 1.08E-04 | 4.51E-05 | 4.21 | 1.14 | 2.146 | hsa-miR-34a-3p    |
| MIMAT0018938 | 3.64E-06 | 1.07E-06 | 5.1  | 4.73 | 2.146 | hsa-miR-548ac     |

|              |          |          |      |       |       |                   |
|--------------|----------|----------|------|-------|-------|-------------------|
| MIMAT0028229 | 1.49E-06 | 4.05E-07 | 5.32 | 5.68  | 2.139 | hsa-miR-7159-3p   |
| MIMAT0022255 | 4.42E-05 | 1.68E-05 | 4.46 | 2.09  | 2.139 | hsa-miR-4524b-5p  |
| MIMAT0000442 | 3.52E-04 | 1.65E-04 | 3.87 | -0.09 | 2.136 | hsa-miR-9-3p      |
| MIMAT0019921 | 5.09E-06 | 1.54E-06 | 5.02 | 4.38  | 2.135 | hsa-miR-4768-3p   |
| MIMAT0022485 | 5.64E-06 | 1.74E-06 | 4.99 | 4.26  | 2.133 | hsa-miR-4666b     |
| MIMAT0000719 | 1.60E-04 | 7.00E-05 | 4.1  | 0.72  | 2.133 | hsa-miR-367-3p    |
| MIMAT0019066 | 1.49E-05 | 5.03E-06 | 4.75 | 3.24  | 2.13  | hsa-miR-4527      |
| MIMAT0000086 | 5.59E-04 | 2.71E-04 | 3.74 | -0.56 | 2.126 | hsa-miR-29a-3p    |
| MIMAT0026613 | 1.83E-05 | 6.31E-06 | 4.69 | 3.02  | 2.126 | hsa-miR-510-3p    |
| MIMAT0002851 | 8.32E-05 | 3.39E-05 | 4.28 | 1.41  | 2.123 | hsa-miR-517-5p    |
| MIMAT0003293 | 2.39E-05 | 8.48E-06 | 4.62 | 2.74  | 2.122 | hsa-miR-624-5p    |
| MIMAT0022712 | 6.67E-08 | 1.35E-08 | 6.03 | 8.98  | 2.121 | hsa-miR-1271-3p   |
| MIMAT0004509 | 2.73E-05 | 9.88E-06 | 4.59 | 2.59  | 2.118 | hsa-miR-93-3p     |
| MIMAT0005874 | 4.94E-05 | 1.89E-05 | 4.43 | 1.97  | 2.117 | hsa-miR-548e-3p   |
| MIMAT0019204 | 3.15E-05 | 1.15E-05 | 4.55 | 2.45  | 2.117 | hsa-miR-3140-5p   |
| MIMAT0028225 | 1.46E-06 | 3.95E-07 | 5.32 | 5.7   | 2.116 | hsa-miR-7157-3p   |
| MIMAT0031074 | 3.77E-05 | 1.41E-05 | 4.5  | 2.26  | 2.114 | hsa-miR-450a-2-3p |
| MIMAT0004701 | 1.34E-05 | 4.43E-06 | 4.78 | 3.36  | 2.113 | hsa-miR-338-5p    |
| MIMAT0004588 | 4.66E-06 | 1.40E-06 | 5.04 | 4.47  | 2.11  | hsa-miR-27b-5p    |
| MIMAT0019906 | 8.10E-05 | 3.28E-05 | 4.29 | 1.45  | 2.109 | hsa-miR-4760-5p   |
| MIMAT0019957 | 4.42E-35 | 1.20E-37 | 17.7 | 75    | 2.108 | hsa-miR-4787-3p   |
| MIMAT0019911 | 2.58E-05 | 9.27E-06 | 4.6  | 2.66  | 2.105 | hsa-miR-4762-3p   |
| MIMAT0000703 | 6.36E-05 | 2.50E-05 | 4.36 | 1.71  | 2.104 | hsa-miR-361-5p    |
| MIMAT0015088 | 1.18E-06 | 3.12E-07 | 5.37 | 5.93  | 2.104 | hsa-miR-514b-3p   |
| MIMAT0000428 | 2.32E-04 | 1.05E-04 | 3.99 | 0.33  | 2.102 | hsa-miR-135a-5p   |
| MIMAT0004958 | 7.30E-05 | 2.91E-05 | 4.32 | 1.56  | 2.102 | hsa-miR-301b-3p   |
| MIMAT0003393 | 8.28E-05 | 3.37E-05 | 4.29 | 1.42  | 2.101 | hsa-miR-425-5p    |
| MIMAT0018996 | 1.88E-05 | 6.51E-06 | 4.69 | 2.99  | 2.101 | hsa-miR-4469      |
| MIMAT0021038 | 1.82E-04 | 8.09E-05 | 4.06 | 0.59  | 2.1   | hsa-miR-548ap-3p  |
| MIMAT0031013 | 1.13E-05 | 3.66E-06 | 4.82 | 3.55  | 2.096 | hsa-miR-8086      |
| MIMAT0003338 | 1.99E-05 | 6.95E-06 | 4.67 | 2.93  | 2.092 | hsa-miR-660-5p    |
| MIMAT0004506 | 1.13E-04 | 4.76E-05 | 4.2  | 1.09  | 2.09  | hsa-miR-33a-3p    |
| MIMAT0021029 | 3.05E-05 | 1.11E-05 | 4.56 | 2.48  | 2.089 | hsa-miR-548ao-5p  |
| MIMAT0003250 | 7.34E-05 | 2.94E-05 | 4.32 | 1.55  | 2.089 | hsa-miR-585-3p    |
| MIMAT0019976 | 3.65E-05 | 1.36E-05 | 4.51 | 2.29  | 2.088 | hsa-miR-4799-5p   |
| MIMAT0028227 | 1.31E-05 | 4.33E-06 | 4.78 | 3.39  | 2.088 | hsa-miR-7158-3p   |
| MIMAT0004779 | 4.47E-05 | 1.70E-05 | 4.46 | 2.08  | 2.088 | hsa-miR-509-5p    |
| MIMAT0004801 | 2.59E-05 | 9.30E-06 | 4.6  | 2.65  | 2.087 | hsa-miR-590-3p    |
| MIMAT0009197 | 4.04E-06 | 1.20E-06 | 5.08 | 4.62  | 2.084 | hsa-miR-205-3p    |
| MIMAT0015015 | 8.96E-06 | 2.86E-06 | 4.88 | 3.79  | 2.083 | hsa-miR-3144-3p   |
| MIMAT0000075 | 8.14E-04 | 4.05E-04 | 3.62 | -0.94 | 2.083 | hsa-miR-20a-5p    |
| MIMAT0019716 | 6.83E-05 | 2.71E-05 | 4.34 | 1.63  | 2.083 | hsa-miR-4652-5p   |
| MIMAT0005904 | 2.18E-06 | 6.13E-07 | 5.23 | 5.27  | 2.082 | hsa-miR-1253      |
| MIMAT0015046 | 1.13E-05 | 3.68E-06 | 4.82 | 3.54  | 2.081 | hsa-miR-3171      |
| MIMAT0019076 | 1.13E-05 | 3.67E-06 | 4.82 | 3.54  | 2.08  | hsa-miR-548am-3p  |
| MIMAT0016858 | 2.24E-06 | 6.31E-07 | 5.22 | 5.25  | 2.078 | hsa-miR-4306      |
| MIMAT0004959 | 5.52E-05 | 2.13E-05 | 4.4  | 1.86  | 2.076 | hsa-miR-216b-5p   |
| MIMAT0018187 | 1.47E-05 | 4.94E-06 | 4.75 | 3.26  | 2.076 | hsa-miR-3913-5p   |
| MIMAT0016871 | 2.51E-05 | 8.98E-06 | 4.61 | 2.69  | 2.074 | hsa-miR-4320      |
| MIMAT0028234 | 6.50E-05 | 2.56E-05 | 4.35 | 1.68  | 2.073 | hsa-miR-7162-5p   |
| MIMAT0022692 | 2.83E-05 | 1.02E-05 | 4.58 | 2.56  | 2.072 | hsa-miR-181b-3p   |
| MIMAT0018197 | 1.92E-05 | 6.66E-06 | 4.68 | 2.97  | 2.071 | hsa-miR-3922-3p   |
| MIMAT0000276 | 2.55E-05 | 9.15E-06 | 4.61 | 2.67  | 2.07  | hsa-miR-219a-5p   |
| MIMAT0015086 | 2.45E-06 | 6.96E-07 | 5.2  | 5.15  | 2.07  | hsa-miR-3201      |
| MIMAT0004901 | 6.51E-05 | 2.57E-05 | 4.35 | 1.68  | 2.068 | hsa-miR-298       |
| MIMAT0030994 | 3.16E-05 | 1.16E-05 | 4.55 | 2.44  | 2.068 | hsa-miR-8067      |
| MIMAT0016887 | 3.09E-05 | 1.13E-05 | 4.55 | 2.47  | 2.067 | hsa-miR-4325      |
| MIMAT0019047 | 1.60E-05 | 5.42E-06 | 4.73 | 3.17  | 2.067 | hsa-miR-4510      |



|                 |          |          |      |       |       |                                         |
|-----------------|----------|----------|------|-------|-------|-----------------------------------------|
| MIMAT0003389    | 2.16E-05 | 7.60E-06 | 4.65 | 2.85  | 2.066 | hsa-miR-542-3p                          |
| MIMAT0022280    | 1.05E-05 | 3.38E-06 | 4.84 | 3.62  | 2.066 | hsa-miR-5582-3p                         |
| MIMAT0026620    | 8.74E-05 | 3.59E-05 | 4.27 | 1.36  | 2.065 | hsa-miR-598-5p                          |
| MIMAT0026640    | 1.91E-05 | 6.60E-06 | 4.68 | 2.98  | 2.065 | hsa-miR-670-3p                          |
| MIMAT0005877    | 3.56E-05 | 1.32E-05 | 4.52 | 2.32  | 2.064 | hsa-miR-1286                            |
| MIMAT0022713    | 5.30E-22 | 6.61E-24 | 12.2 | 43.7  | 2.057 | hsa-miR-1185-2-3p                       |
| MIMAT0003879    | 7.40E-05 | 2.97E-05 | 4.32 | 1.54  | 2.054 | hsa-miR-758-3p<br>hsa-miR-548g-5p, hsa- |
| MIMAT0022722, N | 2.91E-05 | 1.06E-05 | 4.57 | 2.53  | 2.053 | miR-548x-5p, hsa-<br>miR-548ai-5p       |
| MIMAT0000730    | 5.61E-04 | 2.72E-04 | 3.74 | -0.56 | 2.051 | hsa-miR-377-3p                          |
| MIMAT0000456    | 3.47E-04 | 1.62E-04 | 3.88 | -0.07 | 2.048 | hsa-miR-186-5p                          |
| MIMAT0018196    | 2.25E-05 | 7.97E-06 | 4.64 | 2.8   | 2.048 | hsa-miR-3921                            |
| MIMAT0030980    | 8.32E-05 | 3.39E-05 | 4.28 | 1.41  | 2.046 | hsa-miR-8053                            |
| MIMAT0005907    | 2.31E-04 | 1.05E-04 | 3.99 | 0.34  | 2.045 | hsa-miR-1256                            |
| MIMAT0019054    | 1.16E-04 | 4.90E-05 | 4.19 | 1.06  | 2.045 | hsa-miR-4517                            |
| MIMAT0021035    | 1.64E-04 | 7.19E-05 | 4.09 | 0.7   | 2.042 | hsa-miR-5007-5p                         |
| MIMAT0019052    | 6.62E-09 | 1.09E-09 | 6.53 | 11.4  | 2.042 | hsa-miR-4515                            |
| MIMAT0004511    | 1.60E-04 | 6.98E-05 | 4.1  | 0.73  | 2.04  | hsa-miR-99a-3p                          |
| MIMAT0018983    | 2.06E-05 | 7.22E-06 | 4.66 | 2.89  | 2.036 | hsa-miR-4461                            |
| MIMAT0025459    | 7.18E-05 | 2.87E-05 | 4.33 | 1.57  | 2.036 | hsa-miR-6501-3p                         |
| MIMAT0000429    | 1.78E-04 | 7.89E-05 | 4.07 | 0.61  | 2.035 | hsa-miR-137                             |
| MIMAT0004927    | 1.97E-05 | 6.84E-06 | 4.67 | 2.95  | 2.033 | hsa-miR-708-3p                          |
| MIMAT0019218    | 8.19E-05 | 3.32E-05 | 4.29 | 1.43  | 2.033 | hsa-miR-3194-3p                         |
| MIMAT0015008    | 3.18E-06 | 9.28E-07 | 5.13 | 4.87  | 2.031 | hsa-miR-3140-3p                         |
| MIMAT0022501    | 7.35E-05 | 2.95E-05 | 4.32 | 1.55  | 2.028 | hsa-miR-5707                            |
| MIMAT0004489    | 3.55E-04 | 1.66E-04 | 3.87 | -0.1  | 2.024 | hsa-miR-16-1-3p                         |
| MIMAT0004702    | 3.16E-05 | 1.16E-05 | 4.55 | 2.44  | 2.023 | hsa-miR-339-3p                          |
| MIMAT0019211    | 7.88E-22 | 1.01E-23 | 12.2 | 43.3  | 2.023 | hsa-miR-3158-5p                         |
| MIMAT0001621    | 1.79E-04 | 7.96E-05 | 4.07 | 0.6   | 2.021 | hsa-miR-369-5p                          |
| MIMAT0019081    | 5.47E-05 | 2.10E-05 | 4.4  | 1.87  | 2.02  | hsa-miR-4538                            |
| MIMAT0003290    | 5.90E-05 | 2.29E-05 | 4.38 | 1.79  | 2.019 | hsa-miR-621                             |
| MIMAT0005950    | 1.08E-04 | 4.51E-05 | 4.21 | 1.14  | 2.017 | hsa-miR-1306-3p                         |
| MIMAT0004805    | 1.22E-04 | 5.21E-05 | 4.17 | 1     | 2.016 | hsa-miR-616-3p                          |
| MIMAT0005908    | 1.87E-04 | 8.35E-05 | 4.05 | 0.56  | 2.016 | hsa-miR-1257                            |
| MIMAT0015081    | 9.42E-05 | 3.89E-05 | 4.25 | 1.28  | 2.015 | hsa-miR-548x-3p                         |
| MIMAT0026744    | 2.99E-05 | 1.08E-05 | 4.56 | 2.51  | 2.014 | hsa-miR-1252-3p                         |
| MIMAT0025843    | 1.05E-04 | 4.37E-05 | 4.22 | 1.17  | 2.007 | hsa-miR-6715b-3p                        |
| MIMAT0015087    | 5.23E-08 | 1.03E-08 | 6.09 | 9.25  | 2.006 | hsa-miR-514b-5p                         |
| MIMAT0015020    | 1.91E-05 | 6.61E-06 | 4.68 | 2.98  | 2.005 | hsa-miR-548v                            |
| MIMAT0019962    | 1.30E-04 | 5.58E-05 | 4.16 | 0.94  | 2.005 | hsa-miR-4790-3p                         |
| MIMAT0022947    | 4.40E-27 | 3.43E-29 | 14.3 | 55.8  | 2.004 | hsa-miR-1238-5p                         |
| MIMAT0019725    | 1.46E-05 | 4.93E-06 | 4.75 | 3.26  | 2.004 | hsa-miR-4658                            |
| MIMAT0019221    | 6.01E-05 | 2.34E-05 | 4.38 | 1.77  | 2.004 | hsa-miR-3677-5p                         |
| MIMAT0027607    | 2.90E-04 | 1.34E-04 | 3.93 | 0.11  | 2.002 | hsa-miR-6853-3p                         |
| MIMAT0025850    | 2.66E-06 | 7.65E-07 | 5.18 | 5.06  | 2.002 | hsa-miR-6719-3p                         |
| MIMAT0032026    | 1.33E-04 | 5.70E-05 | 4.15 | 0.92  | 2.001 | hsa-miR-301b-5p                         |

### GSE 113486 downregulated miRNAs

| ID           | adj.P.Val | P.Value  | t    | B    | logFC | miRNA_ID_LIST     |
|--------------|-----------|----------|------|------|-------|-------------------|
| MIMAT0004602 | 4.41E-21  | 7.22E-23 | -12  | 41.4 | -3.14 | hsa-miR-125a-3p   |
| MIMAT0004592 | 8.57E-10  | 1.11E-10 | -7   | 13.7 | -3.13 | hsa-miR-125b-1-3p |
| MIMAT0015017 | 3.38E-13  | 1.74E-14 | -8.6 | 22.3 | -2.69 | hsa-miR-1273c     |
| MIMAT0025458 | 1.05E-09  | 1.39E-10 | -6.9 | 13.5 | -2.63 | hsa-miR-6501-5p   |
| MIMAT0019710 | 3.74E-20  | 7.29E-22 | -11  | 39.1 | -2.58 | hsa-miR-4648      |
| MIMAT0026481 | 5.11E-14  | 2.09E-15 | -8.9 | 24.4 | -2.5  | hsa-miR-134-3p    |
| MIMAT0019015 | 4.32E-09  | 6.84E-10 | -6.6 | 11.9 | -2.44 | hsa-miR-4481      |
| MIMAT0019852 | 2.28E-38  | 3.56E-41 | -19  | 83.1 | -2.43 | hsa-miR-4730      |

|              |           |           |      |      |       |                 |
|--------------|-----------|-----------|------|------|-------|-----------------|
| MIMAT0027555 | 3.97E-11  | 3.38E-12  | -7.6 | 17.1 | -2.35 | hsa-miR-6827-3p |
| MIMAT0005866 | 5.1E-21   | 8.76E-23  | -12  | 41.2 | -2.33 | hsa-miR-1203    |
| MIMAT0003240 | 1.49E-21  | 2.05E-23  | -12  | 42.6 | -2.31 | hsa-miR-575     |
| MIMAT0018164 | 6.94E-07  | 1.76E-07  | -5.5 | 6.48 | -2.29 | hsa-miR-3713    |
| MIMAT0027614 | 1.22E-14  | 4.23E-16  | -9.2 | 26   | -2.27 | hsa-miR-6857-5p |
| MIMAT0021033 | 3.01E-10  | 3.36E-11  | -7.2 | 14.9 | -2.19 | hsa-miR-5006-5p |
| MIMAT0027363 | 6.21E-09  | 1.02E-09  | -6.5 | 11.5 | -2.11 | hsa-miR-6731-5p |
| MIMAT0026554 | 0.0000396 | 0.0000149 | -4.5 | 2.2  | -2.03 | hsa-miR-433-5p  |

### GSE 106817 upregulated miRNAs

| ID           | adj.P.Val | P.Value   | t    | B    | logFC | miRNA_ID_LIST    |
|--------------|-----------|-----------|------|------|-------|------------------|
| MIMAT0000461 | 1.03E-119 | 1.28E-121 | 24.6 | 267  | 6.216 | hsa-miR-195-5p   |
| MIMAT0005898 | 3.05E-61  | 1.47E-62  | 17.1 | 131  | 5.82  | hsa-miR-1246     |
| MIMAT0000069 | 3.33E-81  | 9.48E-83  | 19.9 | 178  | 5.579 | hsa-miR-16-5p    |
| MIMAT0000278 | 1.54E-94  | 2.76E-96  | 21.6 | 209  | 5.269 | hsa-miR-221-3p   |
| MIMAT0005880 | 9.95E-65  | 4.29E-66  | 17.6 | 139  | 5.26  | hsa-miR-1290     |
| MIMAT0000440 | 1.14E-61  | 5.43E-63  | 17.2 | 132  | 5.129 | hsa-miR-191-5p   |
| MIMAT0000062 | 1.36E-66  | 5.24E-68  | 17.9 | 144  | 4.966 | hsa-let-7a-5p    |
| MIMAT0015072 | 4.42E-71  | 1.58E-72  | 18.5 | 154  | 4.907 | hsa-miR-320e     |
| MIMAT0019025 | 1.67E-66  | 6.52E-68  | 17.9 | 144  | 4.651 | hsa-miR-4490     |
| MIMAT0004597 | 1.91E-66  | 7.53E-68  | 17.9 | 143  | 4.646 | hsa-miR-140-3p   |
| MIMAT0004514 | 1.57E-55  | 9.70E-57  | 16.2 | 118  | 4.479 | hsa-miR-29b-1-5p |
| MIMAT0001631 | 1.38E-44  | 1.47E-45  | 14.4 | 92.4 | 4.427 | hsa-miR-451a     |
| MIMAT0004697 | 6.97E-71  | 2.55E-72  | 18.5 | 154  | 4.334 | hsa-miR-151a-5p  |
| MIMAT0000100 | 7.35E-53  | 5.13E-54  | 15.8 | 112  | 4.321 | hsa-miR-29b-3p   |
| MIMAT0006764 | 1.17E-55  | 7.16E-57  | 16.2 | 118  | 4.276 | hsa-miR-320d     |
| MIMAT0022497 | 1.52E-56  | 9.13E-58  | 16.4 | 120  | 4.225 | hsa-miR-5692b    |
| MIMAT0019901 | 3.57E-45  | 3.67E-46  | 14.5 | 93.8 | 4.216 | hsa-miR-4757-5p  |
| MIMAT0023698 | 2.99E-41  | 3.70E-42  | 13.8 | 84.6 | 4.165 | hsa-miR-6073     |
| MIMAT0003252 | 1.81E-51  | 1.33E-52  | 15.6 | 109  | 4.158 | hsa-miR-586      |
| MIMAT0019223 | 1.50E-57  | 8.71E-59  | 16.5 | 123  | 4.132 | hsa-miR-3688-5p  |
| MIMAT0019935 | 4.79E-58  | 2.69E-59  | 16.6 | 124  | 4.114 | hsa-miR-4777-3p  |
| MIMAT0000097 | 2.37E-45  | 2.41E-46  | 14.6 | 94.2 | 4.114 | hsa-miR-99a-5p   |
| MIMAT0000065 | 6.06E-47  | 5.65E-48  | 14.8 | 97.9 | 4.099 | hsa-let-7d-5p    |
| MIMAT0000425 | 9.05E-47  | 8.50E-48  | 14.8 | 97.5 | 4.094 | hsa-miR-130a-3p  |
| MIMAT0010214 | 1.22E-43  | 1.37E-44  | 14.3 | 90.2 | 4.09  | hsa-miR-151b     |
| MIMAT0000101 | 1.27E-45  | 1.27E-46  | 14.6 | 94.8 | 4.082 | hsa-miR-103a-3p  |
| MIMAT0000096 | 6.21E-50  | 4.89E-51  | 15.3 | 105  | 4.071 | hsa-miR-98-5p    |
| MIMAT0000071 | 6.79E-60  | 3.55E-61  | 16.9 | 128  | 4.035 | hsa-miR-17-3p    |
| MIMAT0003254 | 4.24E-49  | 3.58E-50  | 15.2 | 103  | 4.033 | hsa-miR-548b-3p  |
| MIMAT0002864 | 1.21E-41  | 1.46E-42  | 13.9 | 85.5 | 3.967 | hsa-miR-518d-3p  |
| MIMAT0000064 | 4.07E-45  | 4.20E-46  | 14.5 | 93.6 | 3.916 | hsa-let-7c-5p    |
| MIMAT0000067 | 8.65E-50  | 6.88E-51  | 15.3 | 105  | 3.888 | hsa-let-7f-5p    |
| MIMAT0000082 | 6.47E-40  | 8.55E-41  | 13.6 | 81.5 | 3.885 | hsa-miR-26a-5p   |
| MIMAT0001413 | 3.28E-44  | 3.57E-45  | 14.4 | 91.5 | 3.868 | hsa-miR-20b-5p   |
| MIMAT0003255 | 2.90E-59  | 1.56E-60  | 16.8 | 127  | 3.849 | hsa-miR-588      |
| MIMAT0003253 | 1.37E-57  | 7.92E-59  | 16.5 | 123  | 3.845 | hsa-miR-587      |
| MIMAT0000083 | 4.48E-45  | 4.64E-46  | 14.5 | 93.5 | 3.831 | hsa-miR-26b-5p   |
| MIMAT0002869 | 2.14E-51  | 1.59E-52  | 15.6 | 108  | 3.829 | hsa-miR-519a-3p  |
| MIMAT0004809 | 7.42E-66  | 3.01E-67  | 17.8 | 142  | 3.817 | hsa-miR-628-5p   |
| MIMAT0019741 | 8.12E-47  | 7.60E-48  | 14.8 | 97.6 | 3.804 | hsa-miR-4666a-5p |
| MIMAT0019014 | 2.73E-35  | 4.55E-36  | 12.7 | 70.7 | 3.8   | hsa-miR-4480     |
| MIMAT0004505 | 5.95E-48  | 5.36E-49  | 15   | 100  | 3.748 | hsa-miR-32-3p    |
| MIMAT0024615 | 1.56E-89  | 3.70E-91  | 21   | 197  | 3.736 | hsa-miR-6131     |
| MIMAT0000104 | 1.93E-38  | 2.80E-39  | 13.3 | 78   | 3.726 | hsa-miR-107      |
| MIMAT0015018 | 2.93E-49  | 2.43E-50  | 15.2 | 103  | 3.676 | hsa-miR-3146     |
| MIMAT0004700 | 8.87E-57  | 5.29E-58  | 16.4 | 121  | 3.673 | hsa-miR-331-5p   |
| MIMAT0002888 | 3.90E-55  | 2.46E-56  | 16.2 | 117  | 3.637 | hsa-miR-532-5p   |

|              |           |           |      |      |       |                   |
|--------------|-----------|-----------|------|------|-------|-------------------|
| MIMAT0016844 | 4.18E-41  | 5.20E-42  | 13.8 | 84.3 | 3.631 | hsa-miR-4295      |
| MIMAT0002866 | 7.01E-50  | 5.55E-51  | 15.3 | 105  | 3.626 | hsa-miR-517c-3p   |
| MIMAT0000079 | 6.05E-35  | 1.03E-35  | 12.6 | 69.9 | 3.614 | hsa-miR-24-1-5p   |
| MIMAT0000099 | 8.89E-42  | 1.07E-42  | 13.9 | 85.8 | 3.606 | hsa-miR-101-3p    |
| MIMAT0004594 | 5.24E-62  | 2.45E-63  | 17.2 | 133  | 3.6   | hsa-miR-132-5p    |
| MIMAT0005893 | 9.70E-45  | 1.02E-45  | 14.4 | 92.7 | 3.588 | hsa-miR-1305      |
| MIMAT0022259 | 1.92E-202 | 1.50E-205 | 33.3 | 460  | 3.576 | hsa-miR-5100      |
| MIMAT0003220 | 7.88E-64  | 3.53E-65  | 17.5 | 137  | 3.564 | hsa-miR-556-5p    |
| MIMAT0000252 | 2.41E-45  | 2.46E-46  | 14.6 | 94.2 | 3.557 | hsa-miR-7-5p      |
| MIMAT0000436 | 2.16E-41  | 2.65E-42  | 13.9 | 84.9 | 3.552 | hsa-miR-144-3p    |
| MIMAT0004681 | 3.83E-39  | 5.27E-40  | 13.4 | 79.7 | 3.548 | hsa-miR-26a-2-3p  |
| MIMAT0035704 | 1.15E-63  | 5.24E-65  | 17.5 | 137  | 3.543 | hsa-miR-548bb-3p  |
| MIMAT0000077 | 9.79E-44  | 1.09E-44  | 14.3 | 90.4 | 3.541 | hsa-miR-22-3p     |
| MIMAT0002883 | 3.62E-61  | 1.79E-62  | 17.1 | 131  | 3.537 | hsa-miR-514a-3p   |
| MIMAT0003329 | 2.98E-35  | 5.01E-36  | 12.7 | 70.6 | 3.53  | hsa-miR-411-5p    |
| MIMAT0027627 | 4.99E-40  | 6.55E-41  | 13.6 | 81.7 | 3.517 | hsa-miR-6863      |
| MIMAT0002882 | 5.56E-48  | 4.99E-49  | 15   | 100  | 3.512 | hsa-miR-510-5p    |
| MIMAT0000074 | 2.97E-32  | 5.90E-33  | 12.1 | 63.6 | 3.5   | hsa-miR-19b-3p    |
| MIMAT0019230 | 7.56E-49  | 6.49E-50  | 15.1 | 102  | 3.496 | hsa-miR-3942-3p   |
| MIMAT0003238 | 2.71E-44  | 2.91E-45  | 14.4 | 91.7 | 3.492 | hsa-miR-573       |
| MIMAT0000418 | 3.12E-61  | 1.52E-62  | 17.1 | 131  | 3.485 | hsa-miR-23b-3p    |
| MIMAT0016885 | 2.78E-55  | 1.73E-56  | 16.2 | 117  | 3.458 | hsa-miR-4255      |
| MIMAT0000098 | 5.11E-36  | 8.29E-37  | 12.9 | 72.4 | 3.455 | hsa-miR-100-5p    |
| MIMAT0019727 | 3.07E-44  | 3.33E-45  | 14.4 | 91.6 | 3.447 | hsa-miR-4659a-3p  |
| MIMAT0000419 | 2.04E-38  | 2.97E-39  | 13.3 | 78   | 3.446 | hsa-miR-27b-3p    |
| MIMAT0019875 | 9.90E-40  | 1.32E-40  | 13.6 | 81   | 3.436 | hsa-miR-4744      |
| MIMAT0019232 | 4.20E-34  | 7.55E-35  | 12.5 | 67.9 | 3.432 | hsa-miR-4423-5p   |
| MIMAT0000070 | 1.72E-31  | 3.52E-32  | 12   | 61.8 | 3.414 | hsa-miR-17-5p     |
| MIMAT0000279 | 6.47E-34  | 1.18E-34  | 12.4 | 67.4 | 3.411 | hsa-miR-222-3p    |
| MIMAT0004698 | 1.56E-60  | 7.92E-62  | 17   | 130  | 3.408 | hsa-miR-135b-3p   |
| MIMAT0000274 | 1.78E-44  | 1.91E-45  | 14.4 | 92.1 | 3.404 | hsa-miR-217       |
| MIMAT0000068 | 1.89E-38  | 2.73E-39  | 13.3 | 78   | 3.404 | hsa-miR-15a-5p    |
| MIMAT0002868 | 4.13E-48  | 3.65E-49  | 15   | 101  | 3.395 | hsa-miR-522-3p    |
| MIMAT0002873 | 5.64E-38  | 8.44E-39  | 13.2 | 76.9 | 3.395 | hsa-miR-502-5p    |
| MIMAT0000421 | 4.68E-34  | 8.43E-35  | 12.5 | 67.8 | 3.388 | hsa-miR-122-5p    |
| MIMAT0000072 | 9.09E-35  | 1.57E-35  | 12.6 | 69.4 | 3.378 | hsa-miR-18a-5p    |
| MIMAT0022500 | 8.66E-52  | 6.28E-53  | 15.6 | 109  | 3.368 | hsa-miR-5706      |
| MIMAT0019925 | 1.98E-31  | 4.06E-32  | 11.9 | 61.6 | 3.354 | hsa-miR-4771      |
| MIMAT0000066 | 1.20E-38  | 1.71E-39  | 13.4 | 78.5 | 3.343 | hsa-let-7e-5p     |
| MIMAT0003258 | 4.36E-49  | 3.70E-50  | 15.2 | 103  | 3.337 | hsa-miR-590-5p    |
| MIMAT0000281 | 5.77E-34  | 1.05E-34  | 12.5 | 67.6 | 3.337 | hsa-miR-224-5p    |
| MIMAT0019969 | 2.36E-28  | 5.81E-29  | 11.3 | 54.4 | 3.321 | hsa-miR-4795-3p   |
| MIMAT0000434 | 3.01E-36  | 4.82E-37  | 12.9 | 72.9 | 3.313 | hsa-miR-142-3p    |
| MIMAT0022265 | 5.40E-33  | 1.04E-33  | 12.3 | 65.3 | 3.312 | hsa-miR-548ar-5p  |
| MIMAT0018093 | 8.59E-52  | 6.20E-53  | 15.6 | 109  | 3.308 | hsa-miR-3670      |
| MIMAT0003287 | 3.43E-55  | 2.15E-56  | 16.2 | 117  | 3.307 | hsa-miR-618       |
| MIMAT0002848 | 2.99E-30  | 6.67E-31  | 11.7 | 58.9 | 3.298 | hsa-miR-518c-3p   |
| MIMAT0004507 | 6.59E-39  | 9.30E-40  | 13.4 | 79.1 | 3.296 | hsa-miR-92a-1-5p  |
| MIMAT0003331 | 2.32E-31  | 4.85E-32  | 11.9 | 61.5 | 3.295 | hsa-miR-655-3p    |
| MIMAT0031893 | 1.85E-36  | 2.95E-37  | 12.9 | 73.4 | 3.289 | hsa-miR-181b-2-3p |
| MIMAT0017997 | 1.74E-33  | 3.23E-34  | 12.4 | 66.4 | 3.288 | hsa-miR-3617-5p   |
| MIMAT0019236 | 3.98E-34  | 7.13E-35  | 12.5 | 67.9 | 3.271 | hsa-miR-4529-5p   |
| MIMAT0002850 | 1.15E-33  | 2.10E-34  | 12.4 | 66.9 | 3.27  | hsa-miR-524-3p    |
| MIMAT0022288 | 4.96E-39  | 6.86E-40  | 13.4 | 79.4 | 3.269 | hsa-miR-5586-3p   |
| MIMAT0011157 | 3.45E-37  | 5.29E-38  | 13.1 | 75.1 | 3.261 | hsa-miR-2114-3p   |
| MIMAT0003286 | 3.82E-48  | 3.37E-49  | 15   | 101  | 3.259 | hsa-miR-617       |
| MIMAT0019873 | 1.25E-38  | 1.78E-39  | 13.3 | 78.5 | 3.256 | hsa-miR-4742-3p   |
| MIMAT0004688 | 3.67E-38  | 5.46E-39  | 13.3 | 77.3 | 3.253 | hsa-miR-374a-3p   |

|              |          |          |      |      |       |                 |
|--------------|----------|----------|------|------|-------|-----------------|
| MIMAT0019929 | 4.16E-48 | 3.69E-49 | 15   | 101  | 3.247 | hsa-miR-4774-5p |
| MIMAT0003219 | 1.19E-48 | 1.04E-49 | 15.1 | 102  | 3.241 | hsa-miR-555     |
| MIMAT0004699 | 5.30E-49 | 4.53E-50 | 15.2 | 103  | 3.237 | hsa-miR-148b-5p |
| MIMAT0003260 | 3.29E-38 | 4.85E-39 | 13.3 | 77.5 | 3.236 | hsa-miR-592     |
| MIMAT0019746 | 5.99E-36 | 9.76E-37 | 12.8 | 72.2 | 3.236 | hsa-miR-4668-3p |
| MIMAT0026623 | 2.75E-49 | 2.26E-50 | 15.2 | 103  | 3.23  | hsa-miR-627-3p  |
| MIMAT0003288 | 1.18E-52 | 8.30E-54 | 15.8 | 111  | 3.229 | hsa-miR-619-3p  |
| MIMAT0004768 | 5.71E-53 | 3.96E-54 | 15.8 | 112  | 3.228 | hsa-miR-497-3p  |
| MIMAT0004913 | 2.68E-50 | 2.05E-51 | 15.4 | 106  | 3.222 | hsa-miR-891b    |
| MIMAT0003333 | 7.65E-54 | 5.13E-55 | 16   | 114  | 3.219 | hsa-miR-549a    |
| MIMAT0026606 | 5.44E-40 | 7.16E-41 | 13.6 | 81.7 | 3.212 | hsa-miR-511-3p  |
| MIMAT0019785 | 1.18E-54 | 7.61E-56 | 16.1 | 116  | 3.21  | hsa-miR-4693-3p |
| MIMAT0002849 | 6.00E-33 | 1.16E-33 | 12.2 | 65.2 | 3.2   | hsa-miR-524-5p  |
| MIMAT0002870 | 1.66E-50 | 1.25E-51 | 15.4 | 106  | 3.198 | hsa-miR-499a-5p |
| MIMAT0000433 | 1.49E-31 | 3.03E-32 | 12   | 61.9 | 3.198 | hsa-miR-142-5p  |
| MIMAT0002876 | 1.09E-35 | 1.79E-36 | 12.8 | 71.6 | 3.191 | hsa-miR-505-3p  |
| MIMAT0000688 | 1.92E-38 | 2.78E-39 | 13.3 | 78   | 3.178 | hsa-miR-301a-3p |
| MIMAT0018982 | 8.06E-26 | 2.28E-26 | 10.7 | 48.5 | 3.177 | hsa-miR-4460    |
| MIMAT0019751 | 5.18E-39 | 7.21E-40 | 13.4 | 79.4 | 3.167 | hsa-miR-4670-3p |
| MIMAT0018095 | 5.80E-64 | 2.56E-65 | 17.5 | 138  | 3.158 | hsa-miR-3672    |
| MIMAT0018112 | 8.33E-64 | 3.77E-65 | 17.5 | 137  | 3.153 | hsa-miR-3684    |
| MIMAT0018094 | 3.41E-61 | 1.67E-62 | 17.1 | 131  | 3.152 | hsa-miR-3671    |
| MIMAT0019805 | 1.12E-53 | 7.63E-55 | 15.9 | 114  | 3.151 | hsa-miR-4705    |
| MIMAT0019972 | 3.50E-30 | 7.92E-31 | 11.7 | 58.7 | 3.15  | hsa-miR-4797-5p |
| MIMAT0015060 | 5.61E-41 | 7.07E-42 | 13.8 | 84   | 3.149 | hsa-miR-548w    |
| MIMAT0027581 | 5.33E-41 | 6.69E-42 | 13.8 | 84   | 3.144 | hsa-miR-6839-3p |
| MIMAT0019831 | 5.29E-47 | 4.91E-48 | 14.8 | 98   | 3.143 | hsa-miR-4718    |
| MIMAT0000435 | 4.77E-32 | 9.58E-33 | 12.1 | 63.1 | 3.138 | hsa-miR-143-3p  |
| MIMAT0018078 | 6.82E-59 | 3.75E-60 | 16.7 | 126  | 3.137 | hsa-miR-3658    |
| MIMAT0019203 | 8.49E-66 | 3.48E-67 | 17.8 | 142  | 3.135 | hsa-miR-3136-3p |
| MIMAT0019959 | 1.64E-26 | 4.54E-27 | 10.9 | 50.1 | 3.134 | hsa-miR-4789-5p |
| MIMAT0003279 | 8.48E-33 | 1.65E-33 | 12.2 | 64.8 | 3.131 | hsa-miR-611     |
| MIMAT0015056 | 4.97E-62 | 2.30E-63 | 17.2 | 133  | 3.127 | hsa-miR-3179    |
| MIMAT0004683 | 1.30E-35 | 2.16E-36 | 12.8 | 71.4 | 3.126 | hsa-miR-362-3p  |
| MIMAT0019816 | 3.73E-56 | 2.27E-57 | 16.3 | 119  | 3.123 | hsa-miR-4711-5p |
| MIMAT0004513 | 3.68E-32 | 7.37E-33 | 12.1 | 63.3 | 3.12  | hsa-miR-101-5p  |
| MIMAT0003251 | 1.39E-28 | 3.39E-29 | 11.3 | 55   | 3.115 | hsa-miR-548a-3p |
| MIMAT0015012 | 1.57E-54 | 1.01E-55 | 16.1 | 116  | 3.11  | hsa-miR-3143    |
| MIMAT0019730 | 7.09E-38 | 1.06E-38 | 13.2 | 76.7 | 3.107 | hsa-miR-4661-3p |
| MIMAT0000449 | 3.37E-28 | 8.42E-29 | 11.3 | 54.1 | 3.102 | hsa-miR-146a-5p |
| MIMAT0000090 | 3.28E-28 | 8.18E-29 | 11.3 | 54.1 | 3.095 | hsa-miR-32-5p   |
| MIMAT0000646 | 1.49E-31 | 3.02E-32 | 12   | 61.9 | 3.093 | hsa-miR-155-5p  |
| MIMAT0019924 | 8.11E-46 | 8.09E-47 | 14.6 | 95.3 | 3.093 | hsa-miR-4770    |
| MIMAT0027629 | 4.41E-31 | 9.30E-32 | 11.9 | 60.8 | 3.091 | hsa-miR-6864-3p |
| MIMAT0019218 | 3.53E-33 | 6.67E-34 | 12.3 | 65.7 | 3.083 | hsa-miR-3194-3p |
| MIMAT0019690 | 3.41E-22 | 1.13E-22 | 9.88 | 40.1 | 3.082 | hsa-miR-4633-3p |
| MIMAT0019748 | 3.44E-39 | 4.70E-40 | 13.5 | 79.8 | 3.082 | hsa-miR-219b-3p |
| MIMAT0027579 | 4.68E-44 | 5.12E-45 | 14.3 | 91.1 | 3.079 | hsa-miR-6838-3p |
| MIMAT0000089 | 4.69E-27 | 1.26E-27 | 11   | 51.4 | 3.076 | hsa-miR-31-5p   |
| MIMAT0002867 | 1.35E-33 | 2.49E-34 | 12.4 | 66.7 | 3.073 | hsa-miR-520h    |
| MIMAT0022484 | 3.70E-34 | 6.62E-35 | 12.5 | 68   | 3.073 | hsa-miR-5692a   |
| MIMAT0003285 | 6.84E-40 | 9.07E-41 | 13.6 | 81.4 | 3.07  | hsa-miR-548c-3p |
| MIMAT0002172 | 1.95E-34 | 3.44E-35 | 12.5 | 68.7 | 3.068 | hsa-miR-376b-3p |
| MIMAT0016902 | 4.92E-42 | 5.86E-43 | 14   | 86.4 | 3.068 | hsa-miR-4272    |
| MIMAT0022965 | 1.18E-46 | 1.13E-47 | 14.8 | 97.2 | 3.068 | hsa-miR-3606-3p |
| MIMAT0000075 | 1.81E-27 | 4.77E-28 | 11.1 | 52.3 | 3.066 | hsa-miR-20a-5p  |
| MIMAT0004549 | 6.08E-44 | 6.71E-45 | 14.3 | 90.9 | 3.063 | hsa-miR-148a-5p |
| MIMAT0019763 | 1.09E-42 | 1.27E-43 | 14.1 | 87.9 | 3.06  | hsa-miR-4679    |

|                 |          |          |      |      |       |                                                                                                    |
|-----------------|----------|----------|------|------|-------|----------------------------------------------------------------------------------------------------|
| MIMAT0019078    | 2.96E-51 | 2.21E-52 | 15.5 | 108  | 3.051 | hsa-miR-4536-5p                                                                                    |
| MIMAT0003321    | 4.83E-37 | 7.44E-38 | 13   | 74.8 | 3.047 | hsa-miR-651-5p                                                                                     |
| MIMAT0004917    | 1.27E-47 | 1.15E-48 | 14.9 | 99.5 | 3.044 | hsa-miR-888-3p                                                                                     |
| MIMAT0000691    | 4.30E-28 | 1.08E-28 | 11.2 | 53.8 | 3.043 | hsa-miR-130b-3p                                                                                    |
| MIMAT0019742    | 2.31E-35 | 3.85E-36 | 12.7 | 70.8 | 3.042 | hsa-miR-4666a-3p                                                                                   |
| MIMAT0026610    | 4.00E-36 | 6.46E-37 | 12.9 | 72.6 | 3.037 | hsa-miR-519d-5p                                                                                    |
| MIMAT0004685    | 3.70E-38 | 5.50E-39 | 13.3 | 77.3 | 3.037 | hsa-miR-302d-5p                                                                                    |
| MIMAT0027677    | 1.04E-46 | 9.81E-48 | 14.8 | 97.4 | 3.035 | hsa-miR-6888-3p                                                                                    |
| MIMAT0004567    | 4.37E-48 | 3.90E-49 | 15   | 101  | 3.032 | hsa-miR-219a-1-3p                                                                                  |
| MIMAT0018950    | 1.03E-22 | 3.30E-23 | 10   | 41.3 | 3.03  | hsa-miR-4434                                                                                       |
| MIMAT0014998    | 1.38E-60 | 6.89E-62 | 17   | 130  | 3.029 | hsa-miR-3133                                                                                       |
| MIMAT0000063    | 1.84E-30 | 4.01E-31 | 11.7 | 59.4 | 3.028 | hsa-let-7b-5p                                                                                      |
| MIMAT0027589    | 3.40E-38 | 5.03E-39 | 13.3 | 77.4 | 3.027 | hsa-miR-6844                                                                                       |
| MIMAT0022285    | 5.48E-46 | 5.40E-47 | 14.7 | 95.7 | 3.025 | hsa-miR-5585-5p                                                                                    |
| MIMAT0003885    | 1.41E-51 | 1.03E-52 | 15.6 | 109  | 3.023 | hsa-miR-454-3p                                                                                     |
| MIMAT0005879    | 3.62E-33 | 6.86E-34 | 12.3 | 65.7 | 3.018 | hsa-miR-1289                                                                                       |
| MIMAT0014983    | 1.04E-46 | 9.88E-48 | 14.8 | 97.4 | 3.018 | hsa-miR-3121-3p                                                                                    |
| MIMAT0001532    | 6.21E-28 | 1.58E-28 | 11.2 | 53.4 | 3.018 | hsa-miR-448                                                                                        |
| MIMAT0004749    | 3.11E-30 | 6.96E-31 | 11.7 | 58.8 | 3.015 | hsa-miR-424-3p                                                                                     |
| MIMAT0016898    | 2.96E-34 | 5.25E-35 | 12.5 | 68.2 | 3.013 | hsa-miR-4263                                                                                       |
| MIMAT0004490    | 4.18E-27 | 1.12E-27 | 11   | 51.5 | 3.008 | hsa-miR-19a-5p                                                                                     |
| MIMAT0019714    | 2.90E-27 | 7.75E-28 | 11.1 | 51.9 | 3.007 | hsa-miR-4650-3p                                                                                    |
| MIMAT0001536    | 4.49E-30 | 1.02E-30 | 11.7 | 58.4 | 3.006 | hsa-miR-429                                                                                        |
| MIMAT0005793    | 2.64E-55 | 1.63E-56 | 16.2 | 117  | 3.004 | hsa-miR-320c                                                                                       |
| MIMAT0003269    | 9.54E-38 | 1.44E-38 | 13.2 | 76.4 | 3.001 | hsa-miR-601                                                                                        |
| MIMAT0000682    | 1.76E-30 | 3.82E-31 | 11.7 | 59.4 | 3.001 | hsa-miR-200a-3p                                                                                    |
| MIMAT0003317    | 5.23E-29 | 1.24E-29 | 11.4 | 56   | 2.997 | hsa-miR-647                                                                                        |
| MIMAT0018195    | 2.59E-28 | 6.40E-29 | 11.3 | 54.3 | 2.988 | hsa-miR-3920                                                                                       |
| MIMAT0019036    | 3.65E-39 | 5.01E-40 | 13.4 | 79.7 | 2.988 | hsa-miR-4500                                                                                       |
| MIMAT0002831, N | 2.71E-30 | 6.04E-31 | 11.7 | 59   | 2.985 | hsa-miR-519c-5p, hsa-miR-523-5p, hsa-miR-518e-5p, hsa-miR-522-5p, hsa-miR-519a-5p, hsa-miR-519b-5p |
| MIMAT0015004    | 1.90E-39 | 2.57E-40 | 13.5 | 80.4 | 2.979 | hsa-miR-544b                                                                                       |
| MIMAT0000084    | 3.04E-27 | 8.14E-28 | 11   | 51.8 | 2.971 | hsa-miR-27a-3p                                                                                     |
| MIMAT0000734    | 2.70E-30 | 6.01E-31 | 11.7 | 59   | 2.97  | hsa-miR-380-5p                                                                                     |
| MIMAT0000085    | 5.72E-29 | 1.36E-29 | 11.4 | 55.9 | 2.968 | hsa-miR-28-5p                                                                                      |
| MIMAT0000733    | 2.16E-31 | 4.46E-32 | 11.9 | 61.5 | 2.966 | hsa-miR-379-5p                                                                                     |
| MIMAT0019896    | 3.42E-22 | 1.13E-22 | 9.88 | 40.1 | 2.965 | hsa-miR-4755-3p                                                                                    |
| MIMAT0018354    | 2.08E-59 | 1.11E-60 | 16.8 | 127  | 2.963 | hsa-miR-548y                                                                                       |
| MIMAT0015040    | 1.82E-33 | 3.38E-34 | 12.4 | 66.4 | 2.959 | hsa-miR-3166                                                                                       |
| MIMAT0004812    | 3.08E-36 | 4.94E-37 | 12.9 | 72.9 | 2.959 | hsa-miR-548d-5p                                                                                    |
| MIMAT0000445    | 7.27E-27 | 1.99E-27 | 11   | 50.9 | 2.954 | hsa-miR-126-3p                                                                                     |
| MIMAT0016872    | 6.83E-31 | 1.46E-31 | 11.8 | 60.4 | 2.952 | hsa-miR-4317                                                                                       |
| MIMAT0003216    | 1.41E-36 | 2.22E-37 | 13   | 73.7 | 2.952 | hsa-miR-553                                                                                        |
| MIMAT0000254    | 2.78E-29 | 6.53E-30 | 11.5 | 56.6 | 2.949 | hsa-miR-10b-5p                                                                                     |
| MIMAT0002171    | 4.58E-29 | 1.09E-29 | 11.4 | 56.1 | 2.948 | hsa-miR-410-3p                                                                                     |
| MIMAT0010497    | 4.83E-33 | 9.21E-34 | 12.3 | 65.4 | 2.946 | hsa-miR-759                                                                                        |
| MIMAT0018111    | 3.95E-59 | 2.14E-60 | 16.8 | 126  | 2.944 | hsa-miR-3683                                                                                       |
| MIMAT0018182    | 2.06E-54 | 1.35E-55 | 16.1 | 115  | 2.94  | hsa-miR-3908                                                                                       |
| MIMAT0017985    | 3.29E-49 | 2.75E-50 | 15.2 | 103  | 2.935 | hsa-miR-3607-3p                                                                                    |
| MIMAT0018183    | 1.88E-31 | 3.85E-32 | 11.9 | 61.7 | 2.934 | hsa-miR-3909                                                                                       |
| MIMAT0000705    | 2.20E-23 | 6.90E-24 | 10.2 | 42.9 | 2.934 | hsa-miR-362-5p                                                                                     |
| MIMAT0004801    | 1.92E-33 | 3.59E-34 | 12.3 | 66.3 | 2.932 | hsa-miR-590-3p                                                                                     |
| MIMAT0000681    | 4.86E-26 | 1.36E-26 | 10.8 | 49   | 2.932 | hsa-miR-29c-3p                                                                                     |
| MIMAT0019199    | 7.92E-29 | 1.90E-29 | 11.4 | 55.5 | 2.931 | hsa-miR-3121-5p                                                                                    |
| MIMAT0005894    | 2.71E-49 | 2.22E-50 | 15.2 | 103  | 2.922 | hsa-miR-1243                                                                                       |

|              |          |          |      |      |       |                  |
|--------------|----------|----------|------|------|-------|------------------|
| MIMAT0005928 | 2.59E-42 | 3.02E-43 | 14   | 87.1 | 2.913 | hsa-miR-548h-5p  |
| MIMAT0005897 | 7.54E-31 | 1.61E-31 | 11.8 | 60.3 | 2.911 | hsa-miR-1245a    |
| MIMAT0019004 | 4.57E-39 | 6.30E-40 | 13.4 | 79.5 | 2.909 | hsa-miR-4477a    |
| MIMAT0000759 | 1.36E-22 | 4.37E-23 | 9.98 | 41   | 2.902 | hsa-miR-148b-3p  |
| MIMAT0004510 | 6.32E-32 | 1.27E-32 | 12   | 62.8 | 2.899 | hsa-miR-96-3p    |
| MIMAT0019731 | 4.98E-41 | 6.21E-42 | 13.8 | 84.1 | 2.898 | hsa-miR-4662a-5p |
| MIMAT0019916 | 5.90E-33 | 1.14E-33 | 12.3 | 65.2 | 2.898 | hsa-miR-4765     |
| MIMAT0015007 | 1.52E-28 | 3.72E-29 | 11.3 | 54.9 | 2.89  | hsa-miR-3139     |
| MIMAT0018083 | 5.96E-39 | 8.36E-40 | 13.4 | 79.2 | 2.887 | hsa-miR-3662     |
| MIMAT0018941 | 1.02E-36 | 1.58E-37 | 13   | 74   | 2.883 | hsa-miR-4426     |
| MIMAT0000422 | 1.16E-27 | 3.03E-28 | 11.1 | 52.8 | 2.882 | hsa-miR-124-3p   |
| MIMAT0026638 | 3.35E-38 | 4.95E-39 | 13.3 | 77.4 | 2.881 | hsa-miR-1468-3p  |
| MIMAT0005792 | 6.10E-83 | 1.67E-84 | 20.1 | 182  | 2.88  | hsa-miR-320b     |
| MIMAT0000736 | 1.37E-29 | 3.19E-30 | 11.6 | 57.3 | 2.878 | hsa-miR-381-3p   |
| MIMAT0002810 | 9.58E-25 | 2.83E-25 | 10.5 | 46   | 2.874 | hsa-miR-202-5p   |
| MIMAT0004515 | 1.29E-27 | 3.39E-28 | 11.1 | 52.7 | 2.874 | hsa-miR-29b-2-5p |
| MIMAT0004613 | 5.14E-27 | 1.39E-27 | 11   | 51.3 | 2.871 | hsa-miR-188-3p   |
| MIMAT0003163 | 5.41E-29 | 1.29E-29 | 11.4 | 55.9 | 2.871 | hsa-miR-539-5p   |
| MIMAT0004810 | 3.10E-22 | 1.02E-22 | 9.89 | 40.2 | 2.87  | hsa-miR-629-5p   |
| MIMAT0003303 | 8.61E-31 | 1.85E-31 | 11.8 | 60.1 | 2.868 | hsa-miR-633      |
| MIMAT0003235 | 3.96E-31 | 8.33E-32 | 11.9 | 60.9 | 2.858 | hsa-miR-570-3p   |
| MIMAT0007399 | 5.81E-28 | 1.47E-28 | 11.2 | 53.5 | 2.855 | hsa-miR-1537-3p  |
| MIMAT0019029 | 1.12E-35 | 1.85E-36 | 12.8 | 71.6 | 2.852 | hsa-miR-4494     |
| MIMAT0018979 | 5.92E-36 | 9.63E-37 | 12.8 | 72.2 | 2.851 | hsa-miR-4457     |
| MIMAT0002813 | 3.05E-24 | 9.20E-25 | 10.4 | 44.9 | 2.85  | hsa-miR-493-5p   |
| MIMAT0011159 | 4.44E-33 | 8.45E-34 | 12.3 | 65.5 | 2.847 | hsa-miR-2115-3p  |
| MIMAT0000437 | 5.46E-27 | 1.49E-27 | 11   | 51.2 | 2.847 | hsa-miR-145-5p   |
| MIMAT0004803 | 3.05E-33 | 5.74E-34 | 12.3 | 65.9 | 2.846 | hsa-miR-548a-5p  |
| MIMAT0000243 | 1.50E-33 | 2.76E-34 | 12.4 | 66.6 | 2.844 | hsa-miR-148a-3p  |
| MIMAT0000683 | 1.11E-28 | 2.70E-29 | 11.4 | 55.2 | 2.843 | hsa-miR-302a-5p  |
| MIMAT0022301 | 3.29E-49 | 2.76E-50 | 15.2 | 103  | 2.842 | hsa-miR-5591-5p  |
| MIMAT0018091 | 2.79E-44 | 3.01E-45 | 14.4 | 91.7 | 2.841 | hsa-miR-3668     |
| MIMAT0000094 | 1.09E-24 | 3.25E-25 | 10.5 | 45.9 | 2.836 | hsa-miR-95-3p    |
| MIMAT0018355 | 1.14E-49 | 9.14E-51 | 15.3 | 104  | 2.835 | hsa-miR-3939     |
| MIMAT0026621 | 2.49E-43 | 2.84E-44 | 14.2 | 89.4 | 2.833 | hsa-miR-605-3p   |
| MIMAT0027564 | 3.61E-32 | 7.21E-33 | 12.1 | 63.4 | 2.831 | hsa-miR-6832-5p  |
| MIMAT0022483 | 5.31E-39 | 7.41E-40 | 13.4 | 79.3 | 2.827 | hsa-miR-5691     |
| MIMAT0000416 | 4.34E-28 | 1.09E-28 | 11.2 | 53.8 | 2.826 | hsa-miR-1-3p     |
| MIMAT0019782 | 1.08E-34 | 1.87E-35 | 12.6 | 69.3 | 2.826 | hsa-miR-4691-3p  |
| MIMAT0000414 | 1.05E-24 | 3.10E-25 | 10.5 | 45.9 | 2.82  | hsa-let-7g-5p    |
| MIMAT0001636 | 1.59E-21 | 5.43E-22 | 9.72 | 38.5 | 2.82  | hsa-miR-452-3p   |
| MIMAT0026722 | 1.04E-49 | 8.27E-51 | 15.3 | 104  | 2.819 | hsa-miR-208b-5p  |
| MIMAT0022728 | 5.57E-57 | 3.28E-58 | 16.5 | 121  | 2.818 | hsa-miR-513c-3p  |
| MIMAT0000715 | 7.40E-28 | 1.90E-28 | 11.2 | 53.3 | 2.817 | hsa-miR-302b-3p  |
| MIMAT0004511 | 5.26E-27 | 1.43E-27 | 11   | 51.3 | 2.815 | hsa-miR-99a-3p   |
| MIMAT0026609 | 1.77E-28 | 4.35E-29 | 11.3 | 54.7 | 2.813 | hsa-miR-520f-5p  |
| MIMAT0022705 | 2.31E-50 | 1.77E-51 | 15.4 | 106  | 2.812 | hsa-miR-539-3p   |
| MIMAT0004491 | 7.47E-29 | 1.79E-29 | 11.4 | 55.6 | 2.81  | hsa-miR-19b-1-5p |
| MIMAT0019918 | 2.68E-41 | 3.29E-42 | 13.8 | 84.7 | 2.808 | hsa-miR-4766-3p  |
| MIMAT0019832 | 1.13E-36 | 1.77E-37 | 13   | 73.9 | 2.807 | hsa-miR-4719     |
| MIMAT0019762 | 3.30E-57 | 1.93E-58 | 16.5 | 122  | 2.803 | hsa-miR-4678     |
| MIMAT0000718 | 9.97E-32 | 2.01E-32 | 12   | 62.3 | 2.803 | hsa-miR-302d-3p  |
| MIMAT0004909 | 1.44E-25 | 4.11E-26 | 10.7 | 47.9 | 2.8   | hsa-miR-450b-5p  |
| MIMAT0004784 | 1.20E-27 | 3.15E-28 | 11.1 | 52.8 | 2.797 | hsa-miR-455-3p   |
| MIMAT0022706 | 8.22E-52 | 5.90E-53 | 15.6 | 109  | 2.796 | hsa-miR-561-5p   |
| MIMAT0002863 | 5.13E-22 | 1.72E-22 | 9.84 | 39.7 | 2.793 | hsa-miR-518a-3p  |
| MIMAT0004793 | 2.62E-27 | 6.98E-28 | 11.1 | 52   | 2.792 | hsa-miR-556-3p   |
| MIMAT0000438 | 2.03E-27 | 5.38E-28 | 11.1 | 52.2 | 2.791 | hsa-miR-152-3p   |

|                 |           |           |      |      |       |                                           |
|-----------------|-----------|-----------|------|------|-------|-------------------------------------------|
| MIMAT0022287    | 1.57E-36  | 2.49E-37  | 13   | 73.6 | 2.79  | hsa-miR-5586-5p                           |
| MIMAT0000444    | 2.85E-24  | 8.59E-25  | 10.4 | 44.9 | 2.79  | hsa-miR-126-5p                            |
| MIMAT0005948    | 6.98E-46  | 6.94E-47  | 14.6 | 95.4 | 2.789 | hsa-miR-664a-5p                           |
| MIMAT0000272    | 3.04E-28  | 7.56E-29  | 11.3 | 54.2 | 2.789 | hsa-miR-215-5p                            |
| MIMAT0004972    | 2.36E-30  | 5.21E-31  | 11.7 | 59.1 | 2.789 | hsa-miR-922                               |
| MIMAT0019833    | 4.70E-44  | 5.17E-45  | 14.3 | 91.1 | 2.788 | hsa-miR-4720-5p                           |
| MIMAT0022303    | 1.02E-48  | 8.88E-50  | 15.1 | 102  | 2.787 | hsa-miR-548av-5p                          |
| MIMAT0018198    | 1.23E-58  | 6.86E-60  | 16.7 | 125  | 2.786 | hsa-miR-3923                              |
| MIMAT0003322    | 9.94E-31  | 2.14E-31  | 11.8 | 60   | 2.779 | hsa-miR-652-3p                            |
| MIMAT0005931    | 7.21E-43  | 8.32E-44  | 14.1 | 88.4 | 2.774 | hsa-miR-302e                              |
| MIMAT0019024    | 9.72E-35  | 1.68E-35  | 12.6 | 69.4 | 2.773 | hsa-miR-548al                             |
| MIMAT0019784    | 2.50E-39  | 3.39E-40  | 13.5 | 80.1 | 2.771 | hsa-miR-4693-5p                           |
| MIMAT0000719    | 1.81E-25  | 5.22E-26  | 10.7 | 47.7 | 2.768 | hsa-miR-367-3p                            |
| MIMAT0019040    | 1.01E-36  | 1.57E-37  | 13   | 74   | 2.765 | hsa-miR-4504                              |
| MIMAT0003250    | 4.26E-24  | 1.29E-24  | 10.3 | 44.5 | 2.765 | hsa-miR-585-3p                            |
| MIMAT0002879    | 1.18E-26  | 3.26E-27  | 10.9 | 50.4 | 2.76  | hsa-miR-507                               |
| MIMAT0004566    | 4.39E-33  | 8.34E-34  | 12.3 | 65.5 | 2.758 | hsa-miR-218-2-3p<br>hsa-miR-548c-5p, hsa- |
| MIMAT0004806, M | 2.31E-31  | 4.80E-32  | 11.9 | 61.5 | 2.752 | miR-548o-5p, hsa-<br>miR-548am-5p         |
| MIMAT0019735    | 2.23E-25  | 6.44E-26  | 10.6 | 47.5 | 2.752 | hsa-miR-4663                              |
| MIMAT0000088    | 5.33E-27  | 1.45E-27  | 11   | 51.2 | 2.747 | hsa-miR-30a-3p                            |
| MIMAT0000717    | 2.29E-28  | 5.64E-29  | 11.3 | 54.5 | 2.747 | hsa-miR-302c-3p                           |
| MIMAT0000091    | 9.49E-24  | 2.92E-24  | 10.3 | 43.7 | 2.745 | hsa-miR-33a-5p                            |
| MIMAT0020957    | 3.33E-22  | 1.10E-22  | 9.89 | 40.1 | 2.741 | hsa-miR-548ah-3p                          |
| MIMAT0022267    | 3.60E-22  | 1.19E-22  | 9.88 | 40   | 2.741 | hsa-miR-548as-5p                          |
| MIMAT0004551    | 3.17E-36  | 5.10E-37  | 12.9 | 72.8 | 2.739 | hsa-miR-30d-3p                            |
| MIMAT0019938    | 2.31E-38  | 3.38E-39  | 13.3 | 77.8 | 2.738 | hsa-miR-4779                              |
| MIMAT0004692    | 3.37E-35  | 5.70E-36  | 12.7 | 70.4 | 2.736 | hsa-miR-340-5p                            |
| MIMAT0003319    | 1.23E-30  | 2.65E-31  | 11.8 | 59.8 | 2.733 | hsa-miR-649                               |
| MIMAT0019362    | 4.76E-26  | 1.33E-26  | 10.8 | 49   | 2.732 | hsa-miR-3977                              |
| MIMAT0004702    | 1.52E-30  | 3.30E-31  | 11.8 | 59.6 | 2.731 | hsa-miR-339-3p                            |
| MIMAT0003318    | 2.62E-27  | 6.97E-28  | 11.1 | 52   | 2.729 | hsa-miR-648                               |
| MIMAT0019745    | 7.34E-38  | 1.10E-38  | 13.2 | 76.6 | 2.728 | hsa-miR-4668-5p                           |
| MIMAT0019953    | 6.58E-55  | 4.21E-56  | 16.1 | 117  | 2.727 | hsa-miR-2467-3p                           |
| MIMAT0004517    | 7.74E-20  | 2.90E-20  | 9.29 | 34.6 | 2.723 | hsa-miR-106a-3p                           |
| MIMAT0025459    | 5.28E-27  | 1.43E-27  | 11   | 51.3 | 2.723 | hsa-miR-6501-3p                           |
| MIMAT0004492    | 1.75E-26  | 4.86E-27  | 10.9 | 50   | 2.721 | hsa-miR-19b-2-5p                          |
| MIMAT0004975    | 8.13E-29  | 1.96E-29  | 11.4 | 55.5 | 2.721 | hsa-miR-509-3-5p                          |
| MIMAT0027628    | 3.02E-28  | 7.51E-29  | 11.3 | 54.2 | 2.717 | hsa-miR-6864-5p                           |
| MIMAT0022279    | 7.22E-37  | 1.12E-37  | 13   | 74.3 | 2.715 | hsa-miR-5582-5p                           |
| MIMAT0003234    | 1.99E-31  | 4.11E-32  | 11.9 | 61.6 | 2.714 | hsa-miR-569                               |
| MIMAT0019801    | 2.54E-46  | 2.46E-47  | 14.7 | 96.4 | 2.711 | hsa-miR-4703-5p                           |
| MIMAT0019790    | 1.51E-46  | 1.44E-47  | 14.8 | 97   | 2.71  | hsa-miR-4696                              |
| MIMAT0017983    | 1.79E-49  | 1.45E-50  | 15.3 | 104  | 2.705 | hsa-miR-3606-5p                           |
| MIMAT0019947    | 1.41E-182 | 4.94E-185 | 31.3 | 412  | 2.703 | hsa-miR-4783-3p                           |
| MIMAT0002881    | 2.83E-29  | 6.66E-30  | 11.5 | 56.6 | 2.703 | hsa-miR-509-3p                            |
| MIMAT0017984    | 1.31E-41  | 1.59E-42  | 13.9 | 85.4 | 2.699 | hsa-miR-3607-5p                           |
| MIMAT0002861    | 1.99E-19  | 7.61E-20  | 9.19 | 33.7 | 2.698 | hsa-miR-518e-3p                           |
| MIMAT0018189    | 4.07E-30  | 9.22E-31  | 11.7 | 58.5 | 2.695 | hsa-miR-3915                              |
| MIMAT0003165    | 2.76E-30  | 6.16E-31  | 11.7 | 58.9 | 2.695 | hsa-miR-545-3p                            |
| MIMAT0025466    | 7.16E-28  | 1.83E-28  | 11.2 | 53.3 | 2.693 | hsa-miR-6505-5p                           |
| MIMAT0030424    | 1.04E-25  | 2.95E-26  | 10.7 | 48.3 | 2.693 | hsa-miR-7849-3p                           |
| MIMAT0003164    | 1.33E-25  | 3.79E-26  | 10.7 | 48   | 2.693 | hsa-miR-544a                              |
| MIMAT0001635    | 3.55E-21  | 1.23E-21  | 9.63 | 37.7 | 2.691 | hsa-miR-452-5p                            |
| MIMAT0026765    | 3.27E-45  | 3.35E-46  | 14.5 | 93.8 | 2.685 | hsa-miR-1537-5p                           |
| MIMAT0004916    | 1.14E-32  | 2.24E-33  | 12.2 | 64.5 | 2.684 | hsa-miR-888-5p                            |
| MIMAT0000431    | 8.90E-24  | 2.74E-24  | 10.3 | 43.8 | 2.683 | hsa-miR-140-5p                            |

|              |          |          |      |      |       |                                |
|--------------|----------|----------|------|------|-------|--------------------------------|
| MIMAT0022270 | 1.54E-45 | 1.56E-46 | 14.6 | 94.6 | 2.682 | hsa-miR-5579-3p                |
| MIMAT0000453 | 3.31E-29 | 7.82E-30 | 11.5 | 56.4 | 2.681 | hsa-miR-154-3p                 |
| MIMAT0018447 | 3.06E-34 | 5.44E-35 | 12.5 | 68.2 | 2.68  | hsa-miR-548aa, hsa-miR-548t-3p |
| MIMAT0002833 | 2.13E-23 | 6.69E-24 | 10.2 | 42.9 | 2.677 | hsa-miR-520a-5p                |
| MIMAT0019052 | 3.80E-50 | 2.93E-51 | 15.4 | 105  | 2.671 | hsa-miR-4515                   |
| MIMAT0015033 | 6.57E-28 | 1.67E-28 | 11.2 | 53.4 | 2.666 | hsa-miR-3159                   |
| MIMAT0003267 | 1.07E-26 | 2.96E-27 | 10.9 | 50.5 | 2.665 | hsa-miR-599                    |
| MIMAT0018988 | 9.23E-53 | 6.48E-54 | 15.8 | 112  | 2.663 | hsa-miR-4464                   |
| MIMAT0005945 | 5.39E-45 | 5.61E-46 | 14.5 | 93.3 | 2.663 | hsa-miR-1255b-5p               |
| MIMAT0015039 | 8.60E-35 | 1.48E-35 | 12.6 | 69.5 | 2.66  | hsa-miR-3165                   |
| MIMAT0000076 | 2.22E-19 | 8.50E-20 | 9.17 | 33.6 | 2.653 | hsa-miR-21-5p                  |
| MIMAT0004763 | 2.58E-30 | 5.72E-31 | 11.7 | 59   | 2.646 | hsa-miR-488-3p                 |
| MIMAT0005909 | 2.32E-51 | 1.73E-52 | 15.6 | 108  | 2.639 | hsa-miR-1258                   |
| MIMAT0027379 | 5.13E-34 | 9.28E-35 | 12.5 | 67.7 | 2.639 | hsa-miR-6739-5p                |
| MIMAT0022861 | 1.52E-51 | 1.11E-52 | 15.6 | 109  | 2.639 | hsa-miR-376c-5p                |
| MIMAT0004805 | 3.07E-22 | 1.00E-22 | 9.9  | 40.2 | 2.638 | hsa-miR-616-3p                 |
| MIMAT0003289 | 1.74E-50 | 1.31E-51 | 15.4 | 106  | 2.638 | hsa-miR-620                    |
| MIMAT0000241 | 1.62E-40 | 2.08E-41 | 13.7 | 82.9 | 2.637 | hsa-miR-208a-3p                |
| MIMAT0019897 | 3.93E-44 | 4.29E-45 | 14.3 | 91.3 | 2.633 | hsa-miR-499b-5p                |
| MIMAT0004798 | 9.25E-44 | 1.03E-44 | 14.3 | 90.4 | 2.629 | hsa-miR-548b-5p                |
| MIMAT0004506 | 1.65E-27 | 4.33E-28 | 11.1 | 52.4 | 2.626 | hsa-miR-33a-3p                 |
| MIMAT0002839 | 5.20E-21 | 1.81E-21 | 9.59 | 37.4 | 2.625 | hsa-miR-525-3p                 |
| MIMAT0000458 | 2.36E-33 | 4.42E-34 | 12.3 | 66.1 | 2.624 | hsa-miR-190a-5p                |
| MIMAT0019019 | 1.41E-20 | 5.07E-21 | 9.48 | 36.3 | 2.621 | hsa-miR-4485-3p                |
| MIMAT0016877 | 1.07E-40 | 1.37E-41 | 13.7 | 83.3 | 2.621 | hsa-miR-4256                   |
| MIMAT0000680 | 3.19E-20 | 1.17E-20 | 9.39 | 35.5 | 2.621 | hsa-miR-106b-5p                |
| MIMAT0016855 | 5.24E-28 | 1.32E-28 | 11.2 | 53.6 | 2.62  | hsa-miR-4302                   |
| MIMAT0005791 | 1.22E-39 | 1.64E-40 | 13.5 | 80.8 | 2.617 | hsa-miR-1264                   |
| MIMAT0018954 | 1.28E-29 | 2.96E-30 | 11.6 | 57.4 | 2.616 | hsa-miR-548ae-3p               |
| MIMAT0004690 | 9.42E-26 | 2.67E-26 | 10.7 | 48.4 | 2.616 | hsa-miR-379-3p                 |
| MIMAT0005885 | 1.44E-22 | 4.66E-23 | 9.97 | 41   | 2.614 | hsa-miR-1295a                  |
| MIMAT0019725 | 5.44E-25 | 1.59E-25 | 10.5 | 46.6 | 2.614 | hsa-miR-4658                   |
| MIMAT0004796 | 2.82E-43 | 3.22E-44 | 14.2 | 89.3 | 2.613 | hsa-miR-576-3p                 |
| MIMAT0000730 | 2.89E-19 | 1.11E-19 | 9.14 | 33.3 | 2.612 | hsa-miR-377-3p                 |
| MIMAT0000260 | 3.45E-20 | 1.27E-20 | 9.38 | 35.4 | 2.611 | hsa-miR-182-3p                 |
| MIMAT0004765 | 1.66E-29 | 3.87E-30 | 11.5 | 57.1 | 2.611 | hsa-miR-491-3p                 |
| MIMAT0016905 | 2.00E-26 | 5.59E-27 | 10.9 | 49.9 | 2.611 | hsa-miR-4275                   |
| MIMAT0019869 | 1.61E-47 | 1.47E-48 | 14.9 | 99.2 | 2.609 | hsa-miR-4740-5p                |
| MIMAT0019914 | 8.15E-44 | 9.02E-45 | 14.3 | 90.6 | 2.608 | hsa-miR-4764-5p                |
| MIMAT0000259 | 2.07E-21 | 7.08E-22 | 9.69 | 38.3 | 2.606 | hsa-miR-182-5p                 |
| MIMAT0022300 | 1.69E-32 | 3.36E-33 | 12.2 | 64.1 | 2.606 | hsa-miR-5590-3p                |
| MIMAT0000078 | 1.60E-35 | 2.66E-36 | 12.8 | 71.2 | 2.605 | hsa-miR-23a-3p                 |
| MIMAT0004901 | 9.61E-24 | 2.96E-24 | 10.3 | 43.7 | 2.603 | hsa-miR-298                    |
| MIMAT0003247 | 1.39E-22 | 4.49E-23 | 9.98 | 41   | 2.603 | hsa-miR-582-5p                 |
| MIMAT0004689 | 1.57E-25 | 4.50E-26 | 10.7 | 47.8 | 2.602 | hsa-miR-377-5p                 |
| MIMAT0003223 | 1.05E-34 | 1.82E-35 | 12.6 | 69.3 | 2.602 | hsa-miR-559                    |
| MIMAT0019937 | 1.28E-36 | 2.00E-37 | 13   | 73.8 | 2.598 | hsa-miR-4778-3p                |
| MIMAT0018972 | 6.05E-58 | 3.42E-59 | 16.6 | 124  | 2.597 | hsa-miR-548ah-5p               |
| MIMAT0022269 | 2.06E-40 | 2.65E-41 | 13.7 | 82.6 | 2.595 | hsa-miR-5579-5p                |
| MIMAT0019736 | 2.46E-37 | 3.78E-38 | 13.1 | 75.4 | 2.595 | hsa-miR-4662b                  |
| MIMAT0027571 | 1.18E-21 | 4.01E-22 | 9.75 | 38.8 | 2.594 | hsa-miR-6835-3p                |
| MIMAT0003282 | 4.55E-90 | 1.06E-91 | 21.1 | 198  | 2.594 | hsa-miR-614                    |
| MIMAT0019703 | 3.63E-19 | 1.41E-19 | 9.12 | 33   | 2.594 | hsa-miR-4643                   |
| MIMAT0030988 | 1.20E-44 | 1.27E-45 | 14.4 | 92.5 | 2.593 | hsa-miR-8061                   |
| MIMAT0019716 | 3.60E-22 | 1.19E-22 | 9.88 | 40   | 2.588 | hsa-miR-4652-5p                |
| MIMAT0011162 | 2.27E-27 | 6.04E-28 | 11.1 | 52.1 | 2.586 | hsa-miR-2117                   |
| MIMAT0005914 | 1.00E-53 | 6.77E-55 | 15.9 | 114  | 2.586 | hsa-miR-1262                   |



|                 |           |           |      |      |       |                                          |
|-----------------|-----------|-----------|------|------|-------|------------------------------------------|
| MIMAT0004764    | 5.29E-25  | 1.55E-25  | 10.5 | 46.6 | 2.585 | hsa-miR-490-5p                           |
| MIMAT0019962    | 4.60E-23  | 1.45E-23  | 10.1 | 42.1 | 2.584 | hsa-miR-4790-3p<br>hsa-miR-548g-5p, hsa- |
| MIMAT0022722, M | 2.35E-33  | 4.38E-34  | 12.3 | 66.1 | 2.574 | miR-548x-5p, hsa-<br>miR-548aj-5p        |
| MIMAT0018946    | 1.80E-39  | 2.43E-40  | 13.5 | 80.4 | 2.573 | hsa-miR-548ad-3p                         |
| MIMAT0005951    | 8.63E-154 | 4.71E-156 | 28.3 | 346  | 2.573 | hsa-miR-1307-3p                          |
| MIMAT0015042    | 4.48E-35  | 7.59E-36  | 12.7 | 70.2 | 2.572 | hsa-miR-3167                             |
| MIMAT0030983    | 2.64E-19  | 1.02E-19  | 9.15 | 33.4 | 2.571 | hsa-miR-8056                             |
| MIMAT0005933    | 5.24E-46  | 5.15E-47  | 14.7 | 95.7 | 2.569 | hsa-miR-1277-3p                          |
| MIMAT0022304    | 1.26E-38  | 1.80E-39  | 13.3 | 78.4 | 2.564 | hsa-miR-548av-3p                         |
| MIMAT0004922    | 9.98E-49  | 8.68E-50  | 15.1 | 102  | 2.562 | hsa-miR-875-5p                           |
| MIMAT0001545    | 6.22E-23  | 1.98E-23  | 10.1 | 41.8 | 2.562 | hsa-miR-450a-5p<br>hsa-miR-548ai, hsa-   |
| MIMAT0018989, M | 8.31E-40  | 1.11E-40  | 13.6 | 81.2 | 2.559 | miR-570-5p                               |
| MIMAT0000251    | 2.82E-23  | 8.89E-24  | 10.1 | 42.6 | 2.559 | hsa-miR-147a                             |
| MIMAT0019765    | 8.44E-28  | 2.17E-28  | 11.2 | 53.1 | 2.558 | hsa-miR-4680-3p                          |
| MIMAT0016861    | 6.69E-28  | 1.71E-28  | 11.2 | 53.4 | 2.558 | hsa-miR-4308                             |
| MIMAT0014977    | 1.70E-54  | 1.11E-55  | 16.1 | 116  | 2.556 | hsa-miR-3115                             |
| MIMAT0019752    | 1.97E-31  | 4.05E-32  | 11.9 | 61.6 | 2.556 | hsa-miR-4671-5p                          |
| MIMAT0005944    | 1.17E-29  | 2.71E-30  | 11.6 | 57.5 | 2.554 | hsa-miR-1252-5p                          |
| MIMAT0000275    | 4.83E-24  | 1.47E-24  | 10.3 | 44.4 | 2.551 | hsa-miR-218-5p                           |
| MIMAT0019070    | 1.68E-23  | 5.24E-24  | 10.2 | 43.1 | 2.551 | hsa-miR-4531                             |
| MIMAT0000735    | 7.56E-20  | 2.82E-20  | 9.3  | 34.6 | 2.545 | hsa-miR-380-3p                           |
| MIMAT0022696    | 2.55E-24  | 7.66E-25  | 10.4 | 45   | 2.543 | hsa-miR-301a-5p                          |
| MIMAT0019890    | 3.69E-25  | 1.07E-25  | 10.6 | 47   | 2.54  | hsa-miR-4753-5p                          |
| MIMAT0002841    | 2.22E-20  | 8.08E-21  | 9.43 | 35.9 | 2.54  | hsa-miR-518f-5p                          |
| MIMAT0019974    | 1.85E-30  | 4.06E-31  | 11.7 | 59.4 | 2.537 | hsa-miR-4798-5p                          |
| MIMAT0031003    | 5.04E-41  | 6.31E-42  | 13.8 | 84.1 | 2.533 | hsa-miR-8076                             |
| MIMAT0015016    | 1.71E-31  | 3.48E-32  | 12   | 61.8 | 2.533 | hsa-miR-3145-3p                          |
| MIMAT0019076    | 7.14E-27  | 1.95E-27  | 11   | 51   | 2.533 | hsa-miR-548am-3p                         |
| MIMAT0018077    | 5.62E-30  | 1.28E-30  | 11.6 | 58.2 | 2.531 | hsa-miR-3657                             |
| MIMAT0014981    | 2.14E-36  | 3.42E-37  | 12.9 | 73.2 | 2.531 | hsa-miR-3119                             |
| MIMAT0004606    | 1.37E-21  | 4.67E-22  | 9.73 | 38.7 | 2.53  | hsa-miR-136-3p                           |
| MIMAT0005917    | 2.02E-40  | 2.60E-41  | 13.7 | 82.7 | 2.529 | hsa-miR-548m                             |
| MIMAT0002874    | 7.51E-22  | 2.53E-22  | 9.8  | 39.3 | 2.526 | hsa-miR-503-5p                           |
| MIMAT0004925    | 4.40E-31  | 9.27E-32  | 11.9 | 60.8 | 2.526 | hsa-miR-876-3p                           |
| MIMAT0014987    | 8.62E-19  | 3.40E-19  | 9.02 | 32.2 | 2.524 | hsa-miR-548s                             |
| MIMAT0005912    | 3.14E-30  | 7.06E-31  | 11.7 | 58.8 | 2.524 | hsa-miR-548g-3p                          |
| MIMAT0005913    | 9.12E-41  | 1.16E-41  | 13.7 | 83.5 | 2.524 | hsa-miR-1261                             |
| MIMAT0018202    | 3.19E-39  | 4.34E-40  | 13.5 | 79.9 | 2.52  | hsa-miR-3927-3p                          |
| MIMAT0000456    | 1.67E-21  | 5.71E-22  | 9.71 | 38.5 | 2.519 | hsa-miR-186-5p                           |
| MIMAT0018108    | 7.54E-28  | 1.94E-28  | 11.2 | 53.2 | 2.518 | hsa-miR-3681-5p                          |
| MIMAT0019934    | 3.02E-33  | 5.68E-34  | 12.3 | 65.9 | 2.518 | hsa-miR-4777-5p                          |
| MIMAT0019936    | 1.67E-36  | 2.65E-37  | 12.9 | 73.5 | 2.514 | hsa-miR-4778-5p                          |
| MIMAT0004562    | 8.03E-19  | 3.17E-19  | 9.03 | 32.3 | 2.512 | hsa-miR-196a-3p                          |
| MIMAT0002809    | 1.96E-17  | 8.26E-18  | 8.65 | 29   | 2.511 | hsa-miR-146b-5p                          |
| MIMAT0004596    | 1.69E-27  | 4.45E-28  | 11.1 | 52.4 | 2.508 | hsa-miR-138-2-3p                         |
| MIMAT0004501    | 2.39E-16  | 1.05E-16  | 8.35 | 26.5 | 2.507 | hsa-miR-27a-5p                           |
| MIMAT0019968    | 9.37E-45  | 9.82E-46  | 14.4 | 92.8 | 2.507 | hsa-miR-4795-5p                          |
| MIMAT0022289    | 7.12E-22  | 2.39E-22  | 9.81 | 39.4 | 2.503 | hsa-miR-5587-5p                          |
| MIMAT0019197    | 3.75E-42  | 4.46E-43  | 14   | 86.7 | 2.501 | hsa-miR-3117-5p                          |
| MIMAT0019860    | 1.46E-28  | 3.56E-29  | 11.3 | 54.9 | 2.5   | hsa-miR-4735-5p                          |
| MIMAT0011156    | 3.42E-30  | 7.71E-31  | 11.7 | 58.7 | 2.498 | hsa-miR-2114-5p                          |
| MIMAT0004686    | 8.41E-24  | 2.58E-24  | 10.3 | 43.8 | 2.497 | hsa-miR-367-5p                           |
| MIMAT0004921    | 3.46E-43  | 3.97E-44  | 14.2 | 89.1 | 2.497 | hsa-miR-889-3p                           |
| MIMAT0019810    | 5.32E-53  | 3.65E-54  | 15.8 | 112  | 2.496 | hsa-miR-4708-3p                          |
| MIMAT0018957    | 3.75E-28  | 9.40E-29  | 11.2 | 54   | 2.496 | hsa-miR-4439                             |

|                 |           |           |      |      |       |                               |
|-----------------|-----------|-----------|------|------|-------|-------------------------------|
| MIMAT0000442    | 5.42E-19  | 2.13E-19  | 9.07 | 32.6 | 2.495 | hsa-miR-9-3p                  |
| MIMAT0019911    | 1.95E-29  | 4.56E-30  | 11.5 | 57   | 2.495 | hsa-miR-4762-3p               |
| MIMAT0015086    | 3.83E-35  | 6.49E-36  | 12.7 | 70.3 | 2.495 | hsa-miR-3201                  |
| MIMAT0019907    | 2.63E-42  | 3.09E-43  | 14   | 87.1 | 2.493 | hsa-miR-4760-3p               |
| MIMAT0019960    | 1.13E-27  | 2.93E-28  | 11.1 | 52.8 | 2.492 | hsa-miR-4789-3p               |
| MIMAT0003293    | 3.23E-22  | 1.06E-22  | 9.89 | 40.2 | 2.492 | hsa-miR-624-5p                |
| MIMAT0021037    | 2.19E-30  | 4.81E-31  | 11.7 | 59.2 | 2.492 | hsa-miR-548ap-5p              |
| MIMAT0015037    | 3.42E-30  | 7.72E-31  | 11.7 | 58.7 | 2.492 | hsa-miR-3163                  |
| MIMAT0017995    | 5.04E-27  | 1.36E-27  | 11   | 51.3 | 2.492 | hsa-miR-3616-5p               |
| MIMAT0022493    | 6.66E-26  | 1.88E-26  | 10.7 | 48.7 | 2.491 | hsa-miR-5700                  |
| MIMAT0000446    | 1.94E-18  | 7.76E-19  | 8.93 | 31.4 | 2.49  | hsa-miR-127-3p                |
| MIMAT0025851    | 1.14E-35  | 1.88E-36  | 12.8 | 71.5 | 2.488 | hsa-miR-6720-3p               |
| MIMAT0000429    | 5.19E-18  | 2.12E-18  | 8.81 | 30.4 | 2.488 | hsa-miR-137                   |
| MIMAT0026624    | 8.00E-43  | 9.27E-44  | 14.1 | 88.3 | 2.487 | hsa-miR-651-3p                |
| MIMAT0015030    | 1.47E-60  | 7.39E-62  | 17   | 130  | 2.483 | hsa-miR-3156-5p               |
| MIMAT0002875    | 9.43E-22  | 3.19E-22  | 9.77 | 39.1 | 2.482 | hsa-miR-504-5p                |
| MIMAT0004797    | 4.74E-24  | 1.44E-24  | 10.3 | 44.4 | 2.482 | hsa-miR-582-3p                |
| MIMAT0000684    | 1.22E-22  | 3.92E-23  | 9.99 | 41.1 | 2.478 | hsa-miR-302a-3p               |
| MIMAT0025480    | 6.48E-41  | 8.19E-42  | 13.8 | 83.8 | 2.477 | hsa-miR-6512-5p               |
| MIMAT0005870    | 8.61E-33  | 1.67E-33  | 12.2 | 64.8 | 2.475 | hsa-miR-1206                  |
| MIMAT0022266    | 1.27E-20  | 4.54E-21  | 9.49 | 36.4 | 2.475 | hsa-miR-548ar-3p              |
| MIMAT0003225    | 3.04E-38  | 4.47E-39  | 13.3 | 77.5 | 2.47  | hsa-miR-561-3p                |
| MIMAT0020300    | 6.43E-24  | 1.97E-24  | 10.3 | 44.1 | 2.469 | hsa-miR-4520-2-3p             |
| MIMAT0014985    | 7.49E-29  | 1.79E-29  | 11.4 | 55.6 | 2.467 | hsa-miR-3123                  |
| MIMAT0000693    | 9.36E-23  | 2.98E-23  | 10   | 41.4 | 2.466 | hsa-miR-30e-3p                |
| MIMAT0017988    | 3.23E-42  | 3.81E-43  | 14   | 86.9 | 2.465 | hsa-miR-3611                  |
| MIMAT0022724    | 1.26E-29  | 2.91E-30  | 11.6 | 57.4 | 2.464 | hsa-miR-1277-5p               |
| MIMAT0004924    | 2.51E-24  | 7.51E-25  | 10.4 | 45.1 | 2.461 | hsa-miR-876-5p                |
| MIMAT0018097    | 6.93E-40  | 9.21E-41  | 13.6 | 81.4 | 2.459 | hsa-miR-3674                  |
| MIMAT0022264    | 2.27E-27  | 6.04E-28  | 11.1 | 52.1 | 2.458 | hsa-miR-548aq-3p              |
| MIMAT0003389    | 4.12E-30  | 9.35E-31  | 11.7 | 58.5 | 2.456 | hsa-miR-542-3p                |
| MIMAT0018446, N | 8.61E-33  | 1.68E-33  | 12.2 | 64.8 | 2.454 | hsa-miR-548z, hsa-miR-548h-3p |
| MIMAT0017986    | 1.44E-34  | 2.51E-35  | 12.6 | 69   | 2.453 | hsa-miR-3609                  |
| MIMAT0003386    | 5.48E-25  | 1.60E-25  | 10.5 | 46.6 | 2.452 | hsa-miR-376a-5p               |
| MIMAT0018186    | 1.92E-43  | 2.16E-44  | 14.2 | 89.7 | 2.452 | hsa-miR-3912-3p               |
| MIMAT0019080    | 2.07E-25  | 5.97E-26  | 10.6 | 47.6 | 2.451 | hsa-miR-4537                  |
| MIMAT0000448    | 9.70E-20  | 3.65E-20  | 9.27 | 34.4 | 2.446 | hsa-miR-136-5p                |
| MIMAT0019943    | 4.96E-31  | 1.05E-31  | 11.9 | 60.7 | 2.443 | hsa-miR-4781-3p               |
| MIMAT0005907    | 1.02E-17  | 4.20E-18  | 8.73 | 29.7 | 2.442 | hsa-miR-1256                  |
| MIMAT0004785    | 3.82E-28  | 9.58E-29  | 11.2 | 53.9 | 2.442 | hsa-miR-545-5p                |
| MIMAT0019872    | 8.89E-31  | 1.91E-31  | 11.8 | 60.1 | 2.441 | hsa-miR-4742-5p               |
| MIMAT0003325    | 1.63E-19  | 6.17E-20  | 9.21 | 33.9 | 2.44  | hsa-miR-662                   |
| MIMAT0015046    | 9.16E-28  | 2.37E-28  | 11.2 | 53   | 2.44  | hsa-miR-3171                  |
| MIMAT0018938    | 4.97E-24  | 1.51E-24  | 10.3 | 44.4 | 2.439 | hsa-miR-548ac                 |
| MIMAT0015009    | 4.94E-25  | 1.44E-25  | 10.6 | 46.7 | 2.439 | hsa-miR-548t-5p               |
| MIMAT0028216    | 1.75E-19  | 6.66E-20  | 9.2  | 33.8 | 2.433 | hsa-miR-7153-5p               |
| MIMAT0015044    | 2.83E-29  | 6.66E-30  | 11.5 | 56.6 | 2.432 | hsa-miR-3169                  |
| MIMAT0000439    | 5.67E-21  | 1.98E-21  | 9.58 | 37.3 | 2.431 | hsa-miR-153-3p                |
| MIMAT0000073    | 1.75E-28  | 4.29E-29  | 11.3 | 54.7 | 2.429 | hsa-miR-19a-3p                |
| MIMAT0003290    | 3.46E-27  | 9.29E-28  | 11   | 51.7 | 2.426 | hsa-miR-621                   |
| MIMAT0000510    | 1.52E-147 | 1.01E-149 | 27.7 | 331  | 2.425 | hsa-miR-320a                  |
| MIMAT0001625    | 5.25E-19  | 2.06E-19  | 9.08 | 32.7 | 2.424 | hsa-miR-431-5p                |
| MIMAT0018199    | 3.46E-40  | 4.53E-41  | 13.6 | 82.1 | 2.423 | hsa-miR-3924                  |
| MIMAT0003328    | 1.16E-27  | 3.03E-28  | 11.1 | 52.8 | 2.422 | hsa-miR-653-5p                |
| MIMAT0003236    | 1.35E-20  | 4.85E-21  | 9.49 | 36.4 | 2.421 | hsa-miR-571                   |
| MIMAT0000714    | 2.26E-16  | 9.92E-17  | 8.36 | 26.6 | 2.419 | hsa-miR-302b-5p               |
| MIMAT0002859    | 4.93E-20  | 1.83E-20  | 9.34 | 35.1 | 2.417 | hsa-miR-516b-5p               |

|              |          |          |      |      |       |                  |
|--------------|----------|----------|------|------|-------|------------------|
| MIMAT0004929 | 5.21E-33 | 9.97E-34 | 12.3 | 65.3 | 2.416 | hsa-miR-190b     |
| MIMAT0030418 | 2.03E-29 | 4.77E-30 | 11.5 | 56.9 | 2.415 | hsa-miR-6516-3p  |
| MIMAT0003232 | 5.19E-24 | 1.58E-24 | 10.3 | 44.3 | 2.415 | hsa-miR-568      |
| MIMAT0019963 | 3.51E-26 | 9.83E-27 | 10.8 | 49.4 | 2.414 | hsa-miR-4791     |
| MIMAT0019212 | 6.40E-39 | 9.01E-40 | 13.4 | 79.1 | 2.414 | hsa-miR-3160-5p  |
| MIMAT0004987 | 8.57E-16 | 3.88E-16 | 8.19 | 25.2 | 2.413 | hsa-miR-944      |
| MIMAT0005916 | 4.90E-33 | 9.36E-34 | 12.3 | 65.4 | 2.413 | hsa-miR-548n     |
| MIMAT0000424 | 2.93E-19 | 1.13E-19 | 9.14 | 33.3 | 2.412 | hsa-miR-128-3p   |
| MIMAT0027435 | 4.33E-27 | 1.16E-27 | 11   | 51.5 | 2.41  | hsa-miR-6767-3p  |
| MIMAT0023704 | 4.31E-32 | 8.63E-33 | 12.1 | 63.2 | 2.408 | hsa-miR-6079     |
| MIMAT0022471 | 1.34E-32 | 2.66E-33 | 12.2 | 64.3 | 2.408 | hsa-miR-548aw    |
| MIMAT0019984 | 2.76E-28 | 6.84E-29 | 11.3 | 54.3 | 2.403 | hsa-miR-4804-5p  |
| MIMAT0003338 | 1.24E-23 | 3.85E-24 | 10.2 | 43.4 | 2.402 | hsa-miR-660-5p   |
| MIMAT0005887 | 4.79E-22 | 1.60E-22 | 9.85 | 39.8 | 2.401 | hsa-miR-1299     |
| MIMAT0001340 | 5.78E-27 | 1.58E-27 | 11   | 51.2 | 2.4   | hsa-miR-423-3p   |
| MIMAT0027632 | 2.54E-30 | 5.63E-31 | 11.7 | 59   | 2.399 | hsa-miR-6866-5p  |
| MIMAT0022862 | 1.46E-23 | 4.52E-24 | 10.2 | 43.3 | 2.398 | hsa-miR-381-5p   |
| MIMAT0002828 | 5.38E-35 | 9.15E-36 | 12.7 | 70   | 2.396 | hsa-miR-519e-5p  |
| MIMAT0025846 | 4.53E-73 | 1.48E-74 | 18.8 | 159  | 2.394 | hsa-miR-6717-5p  |
| MIMAT0019961 | 9.89E-21 | 3.51E-21 | 9.52 | 36.7 | 2.393 | hsa-miR-4790-5p  |
| MIMAT0022263 | 1.13E-21 | 3.83E-22 | 9.76 | 38.9 | 2.392 | hsa-miR-548aq-5p |
| MIMAT0001638 | 4.14E-16 | 1.84E-16 | 8.28 | 26   | 2.392 | hsa-miR-409-5p   |
| MIMAT0030993 | 1.11E-28 | 2.68E-29 | 11.4 | 55.2 | 2.391 | hsa-miR-8066     |
| MIMAT0003272 | 2.68E-22 | 8.75E-23 | 9.91 | 40.3 | 2.389 | hsa-miR-604      |
| MIMAT0018443 | 4.04E-25 | 1.18E-25 | 10.6 | 46.9 | 2.389 | hsa-miR-374c-5p  |
| MIMAT0019898 | 3.29E-22 | 1.08E-22 | 9.89 | 40.1 | 2.388 | hsa-miR-499b-3p  |
| MIMAT0030427 | 2.18E-31 | 4.52E-32 | 11.9 | 61.5 | 2.387 | hsa-miR-7852-3p  |
| MIMAT0003327 | 5.18E-23 | 1.64E-23 | 10.1 | 42   | 2.386 | hsa-miR-449b-5p  |
| MIMAT0021131 | 7.00E-31 | 1.49E-31 | 11.8 | 60.3 | 2.382 | hsa-miR-5197-3p  |
| MIMAT0006767 | 2.15E-31 | 4.43E-32 | 11.9 | 61.6 | 2.382 | hsa-miR-1827     |
| MIMAT0009978 | 1.35E-31 | 2.73E-32 | 12   | 62   | 2.375 | hsa-miR-2053     |
| MIMAT0019005 | 2.11E-36 | 3.37E-37 | 12.9 | 73.3 | 2.374 | hsa-miR-4477b    |
| MIMAT0019234 | 5.78E-24 | 1.77E-24 | 10.3 | 44.2 | 2.373 | hsa-miR-4474-5p  |
| MIMAT0019951 | 2.12E-34 | 3.74E-35 | 12.5 | 68.6 | 2.372 | hsa-miR-1245b-3p |
| MIMAT0015013 | 1.16E-34 | 2.02E-35 | 12.6 | 69.2 | 2.372 | hsa-miR-548u     |
| MIMAT0004974 | 5.97E-37 | 9.22E-38 | 13   | 74.5 | 2.371 | hsa-miR-924      |
| MIMAT0020541 | 3.23E-34 | 5.76E-35 | 12.5 | 68.1 | 2.37  | hsa-miR-5047     |
| MIMAT0020959 | 9.31E-37 | 1.44E-37 | 13   | 74.1 | 2.369 | hsa-miR-4536-3p  |
| MIMAT0019945 | 2.67E-25 | 7.71E-26 | 10.6 | 47.3 | 2.368 | hsa-miR-4782-3p  |
| MIMAT0004807 | 1.94E-19 | 7.42E-20 | 9.19 | 33.7 | 2.367 | hsa-miR-624-3p   |
| MIMAT0019013 | 1.86E-38 | 2.68E-39 | 13.3 | 78.1 | 2.367 | hsa-miR-548ak    |
| MIMAT0013517 | 4.82E-22 | 1.61E-22 | 9.85 | 39.7 | 2.361 | hsa-miR-2682-5p  |
| MIMAT0018353 | 3.96E-20 | 1.46E-20 | 9.37 | 35.3 | 2.36  | hsa-miR-3938     |
| MIMAT0022277 | 6.02E-29 | 1.44E-29 | 11.4 | 55.8 | 2.356 | hsa-miR-548at-5p |
| MIMAT0019851 | 5.22E-20 | 1.94E-20 | 9.34 | 35   | 2.356 | hsa-miR-4729     |
| MIMAT0004556 | 3.45E-25 | 1.00E-25 | 10.6 | 47.1 | 2.355 | hsa-miR-10b-3p   |
| MIMAT0019016 | 1.49E-34 | 2.61E-35 | 12.6 | 68.9 | 2.355 | hsa-miR-4482-5p  |
| MIMAT0014991 | 8.85E-36 | 1.44E-36 | 12.8 | 71.8 | 2.354 | hsa-miR-3128     |
| MIMAT0022712 | 1.30E-38 | 1.86E-39 | 13.3 | 78.4 | 2.352 | hsa-miR-1271-3p  |
| MIMAT0000727 | 2.04E-20 | 7.40E-21 | 9.44 | 36   | 2.351 | hsa-miR-374a-5p  |
| MIMAT0003281 | 2.57E-20 | 9.38E-21 | 9.42 | 35.7 | 2.351 | hsa-miR-613      |
| MIMAT0003275 | 8.81E-33 | 1.72E-33 | 12.2 | 64.8 | 2.35  | hsa-miR-607      |
| MIMAT0004543 | 3.66E-16 | 1.62E-16 | 8.3  | 26.1 | 2.35  | hsa-miR-192-3p   |
| MIMAT0019761 | 1.26E-28 | 3.06E-29 | 11.4 | 55.1 | 2.35  | hsa-miR-4677-3p  |
| MIMAT0004512 | 3.42E-23 | 1.08E-23 | 10.1 | 42.4 | 2.344 | hsa-miR-100-3p   |
| MIMAT0003265 | 1.60E-17 | 6.69E-18 | 8.68 | 29.2 | 2.343 | hsa-miR-597-5p   |
| MIMAT0001629 | 8.96E-19 | 3.55E-19 | 9.01 | 32.1 | 2.337 | hsa-miR-329-3p   |
| MIMAT0019971 | 2.39E-20 | 8.69E-21 | 9.42 | 35.8 | 2.337 | hsa-miR-4796-3p  |

|              |           |           |      |      |       |                   |
|--------------|-----------|-----------|------|------|-------|-------------------|
| MIMAT0000273 | 6.58E-18  | 2.70E-18  | 8.78 | 30.1 | 2.337 | hsa-miR-216a-5p   |
| MIMAT0022291 | 1.00E-39  | 1.34E-40  | 13.6 | 81   | 2.336 | hsa-miR-548au-5p  |
| MIMAT0018974 | 1.09E-30  | 2.35E-31  | 11.8 | 59.9 | 2.336 | hsa-miR-4452      |
| MIMAT0003274 | 1.59E-32  | 3.15E-33  | 12.2 | 64.2 | 2.335 | hsa-miR-606       |
| MIMAT0005932 | 7.31E-35  | 1.25E-35  | 12.6 | 69.7 | 2.335 | hsa-miR-302f      |
| MIMAT0004600 | 1.63E-33  | 3.00E-34  | 12.4 | 66.5 | 2.331 | hsa-miR-144-5p    |
| MIMAT0000452 | 8.89E-21  | 3.13E-21  | 9.53 | 36.8 | 2.331 | hsa-miR-154-5p    |
| MIMAT0000692 | 1.70E-17  | 7.10E-18  | 8.67 | 29.2 | 2.33  | hsa-miR-30e-5p    |
| MIMAT0004907 | 1.37E-21  | 4.68E-22  | 9.73 | 38.7 | 2.33  | hsa-miR-892a      |
| MIMAT0003268 | 9.72E-21  | 3.44E-21  | 9.52 | 36.7 | 2.329 | hsa-miR-600       |
| MIMAT0000428 | 1.00E-18  | 3.98E-19  | 9    | 32   | 2.328 | hsa-miR-135a-5p   |
| MIMAT0005934 | 8.06E-29  | 1.94E-29  | 11.4 | 55.5 | 2.327 | hsa-miR-548p      |
| MIMAT0019824 | 7.13E-30  | 1.63E-30  | 11.6 | 58   | 2.327 | hsa-miR-4715-5p   |
| MIMAT0004568 | 3.53E-31  | 7.41E-32  | 11.9 | 61   | 2.324 | hsa-miR-221-5p    |
| MIMAT0019905 | 1.19E-27  | 3.09E-28  | 11.1 | 52.8 | 2.322 | hsa-miR-4759      |
| MIMAT0003297 | 7.71E-20  | 2.88E-20  | 9.29 | 34.6 | 2.322 | hsa-miR-628-3p    |
| MIMAT0019931 | 1.54E-36  | 2.44E-37  | 13   | 73.6 | 2.32  | hsa-miR-4775      |
| MIMAT0009197 | 4.71E-28  | 1.19E-28  | 11.2 | 53.7 | 2.319 | hsa-miR-205-3p    |
| MIMAT0005896 | 2.05E-37  | 3.13E-38  | 13.1 | 75.6 | 2.317 | hsa-miR-1244      |
| MIMAT0019039 | 1.40E-14  | 6.76E-15  | 7.83 | 22.4 | 2.316 | hsa-miR-4503      |
| MIMAT0019957 | 3.83E-187 | 7.47E-190 | 31.7 | 424  | 2.316 | hsa-miR-4787-3p   |
| MIMAT0004588 | 1.52E-25  | 4.35E-26  | 10.7 | 47.9 | 2.314 | hsa-miR-27b-5p    |
| MIMAT0004927 | 4.06E-22  | 1.35E-22  | 9.86 | 39.9 | 2.314 | hsa-miR-708-3p    |
| MIMAT0019689 | 1.19E-21  | 4.04E-22  | 9.75 | 38.8 | 2.312 | hsa-miR-4633-5p   |
| MIMAT0022928 | 1.02E-29  | 2.35E-30  | 11.6 | 57.6 | 2.312 | hsa-miR-376a-2-5p |
| MIMAT0000454 | 6.79E-25  | 2.00E-25  | 10.5 | 46.4 | 2.311 | hsa-miR-184       |
| MIMAT0019825 | 1.57E-15  | 7.17E-16  | 8.11 | 24.6 | 2.311 | hsa-miR-4715-3p   |
| MIMAT0030985 | 9.98E-18  | 4.13E-18  | 8.73 | 29.7 | 2.311 | hsa-miR-8058      |
| MIMAT0019823 | 1.49E-22  | 4.83E-23  | 9.97 | 40.9 | 2.311 | hsa-miR-4714-3p   |
| MIMAT0000720 | 1.85E-17  | 7.79E-18  | 8.66 | 29.1 | 2.31  | hsa-miR-376c-3p   |
| MIMAT0005824 | 4.55E-20  | 1.68E-20  | 9.35 | 35.2 | 2.309 | hsa-miR-1179      |
| MIMAT0019920 | 1.72E-24  | 5.12E-25  | 10.4 | 45.4 | 2.308 | hsa-miR-4768-5p   |
| MIMAT0004752 | 3.02E-22  | 9.88E-23  | 9.9  | 40.2 | 2.308 | hsa-miR-20b-3p    |
| MIMAT0004779 | 3.28E-19  | 1.27E-19  | 9.13 | 33.2 | 2.307 | hsa-miR-509-5p    |
| MIMAT0022299 | 6.22E-24  | 1.90E-24  | 10.3 | 44.1 | 2.306 | hsa-miR-5590-5p   |
| MIMAT0000253 | 7.59E-21  | 2.66E-21  | 9.55 | 37   | 2.304 | hsa-miR-10a-5p    |
| MIMAT0000256 | 4.09E-18  | 1.66E-18  | 8.84 | 30.6 | 2.304 | hsa-miR-181a-5p   |
| MIMAT0019693 | 8.82E-22  | 2.98E-22  | 9.78 | 39.1 | 2.303 | hsa-miR-4636      |
| MIMAT0003301 | 1.85E-19  | 7.05E-20  | 9.19 | 33.7 | 2.3   | hsa-miR-33b-5p    |
| MIMAT0005935 | 4.59E-38  | 6.85E-39  | 13.2 | 77.1 | 2.299 | hsa-miR-548i      |
| MIMAT0022498 | 1.23E-20  | 4.39E-21  | 9.5  | 36.5 | 2.298 | hsa-miR-5704      |
| MIMAT0004774 | 1.56E-26  | 4.33E-27  | 10.9 | 50.2 | 2.296 | hsa-miR-501-3p    |
| MIMAT0018184 | 1.49E-31  | 3.03E-32  | 12   | 61.9 | 2.296 | hsa-miR-3910      |
| MIMAT0022978 | 5.42E-22  | 1.82E-22  | 9.83 | 39.6 | 2.294 | hsa-miR-4743-3p   |
| MIMAT0016879 | 2.13E-194 | 3.32E-197 | 32.5 | 440  | 2.294 | hsa-miR-4258      |
| MIMAT0003264 | 5.69E-23  | 1.80E-23  | 10.1 | 41.9 | 2.293 | hsa-miR-596       |
| MIMAT0021084 | 3.57E-18  | 1.44E-18  | 8.85 | 30.8 | 2.292 | hsa-miR-5092      |
| MIMAT0003150 | 8.48E-29  | 2.05E-29  | 11.4 | 55.5 | 2.291 | hsa-miR-455-5p    |
| MIMAT0019768 | 3.35E-19  | 1.30E-19  | 9.13 | 33.1 | 2.291 | hsa-miR-4683      |
| MIMAT0019795 | 2.38E-26  | 6.63E-27  | 10.8 | 49.7 | 2.29  | hsa-miR-4699-3p   |
| MIMAT0018193 | 3.12E-16  | 1.38E-16  | 8.32 | 26.3 | 2.289 | hsa-miR-3919      |
| MIMAT0005890 | 4.39E-14  | 2.17E-14  | 7.68 | 21.3 | 2.289 | hsa-miR-1302      |
| MIMAT0000276 | 2.91E-19  | 1.12E-19  | 9.14 | 33.3 | 2.289 | hsa-miR-219a-5p   |
| MIMAT0005904 | 5.16E-24  | 1.57E-24  | 10.3 | 44.3 | 2.289 | hsa-miR-1253      |
| MIMAT0004555 | 7.95E-21  | 2.79E-21  | 9.55 | 36.9 | 2.288 | hsa-miR-10a-3p    |
| MIMAT0022280 | 1.62E-25  | 4.66E-26  | 10.7 | 47.8 | 2.287 | hsa-miR-5582-3p   |
| MIMAT0000095 | 1.97E-16  | 8.62E-17  | 8.37 | 26.7 | 2.285 | hsa-miR-96-5p     |
| MIMAT0031175 | 3.61E-33  | 6.82E-34  | 12.3 | 65.7 | 2.284 | hsa-miR-548ba     |

|                 |           |           |      |      |       |                                       |
|-----------------|-----------|-----------|------|------|-------|---------------------------------------|
| MIMAT0004956    | 3.04E-30  | 6.81E-31  | 11.7 | 58.8 | 2.284 | hsa-miR-374b-3p                       |
| MIMAT0018969    | 2.22E-31  | 4.62E-32  | 11.9 | 61.5 | 2.283 | hsa-miR-548ag                         |
| MIMAT0005955    | 1.05E-29  | 2.42E-30  | 11.6 | 57.6 | 2.282 | hsa-miR-1197                          |
| MIMAT0005906    | 9.29E-19  | 3.68E-19  | 9.01 | 32.1 | 2.282 | hsa-miR-1255a                         |
| MIMAT0000417    | 2.44E-19  | 9.36E-20  | 9.16 | 33.5 | 2.281 | hsa-miR-15b-5p                        |
| MIMAT0003242    | 5.95E-21  | 2.08E-21  | 9.58 | 37.2 | 2.281 | hsa-miR-577                           |
| MIMAT0018358    | 1.56E-29  | 3.62E-30  | 11.5 | 57.2 | 2.28  | hsa-miR-3942-5p                       |
| MIMAT0018930    | 3.67E-15  | 1.72E-15  | 8.01 | 23.8 | 2.279 | hsa-miR-4418                          |
| MIMAT0026744    | 2.19E-22  | 7.12E-23  | 9.93 | 40.6 | 2.277 | hsa-miR-1252-3p                       |
| MIMAT0013516    | 1.01E-20  | 3.57E-21  | 9.52 | 36.7 | 2.276 | hsa-miR-2681-3p                       |
| MIMAT0004910    | 3.08E-20  | 1.13E-20  | 9.4  | 35.5 | 2.276 | hsa-miR-450b-3p                       |
| MIMAT0019834    | 3.02E-28  | 7.50E-29  | 11.3 | 54.2 | 2.276 | hsa-miR-4720-3p                       |
| MIMAT0002843    | 1.53E-14  | 7.43E-15  | 7.82 | 22.3 | 2.275 | hsa-miR-520b                          |
| MIMAT0019910    | 5.25E-19  | 2.05E-19  | 9.08 | 32.7 | 2.273 | hsa-miR-4762-5p                       |
| MIMAT0019030    | 1.39E-27  | 3.66E-28  | 11.1 | 52.6 | 2.272 | hsa-miR-4495                          |
| MIMAT0005798    | 1.83E-30  | 4.00E-31  | 11.7 | 59.4 | 2.27  | hsa-miR-1185-5p                       |
| MIMAT0015025    | 9.49E-26  | 2.70E-26  | 10.7 | 48.4 | 2.27  | hsa-miR-3152-3p                       |
| MIMAT0004772    | 1.61E-25  | 4.63E-26  | 10.7 | 47.8 | 2.268 | hsa-miR-499a-3p                       |
| MIMAT0025843    | 1.06E-22  | 3.39E-23  | 10   | 41.3 | 2.268 | hsa-miR-6715b-3p                      |
| MIMAT0002806    | 1.25E-14  | 6.01E-15  | 7.85 | 22.5 | 2.267 | hsa-miR-490-3p                        |
| MIMAT0005895    | 8.27E-17  | 3.56E-17  | 8.48 | 27.6 | 2.262 | hsa-miR-548f-3p                       |
| MIMAT0018357    | 1.66E-33  | 3.06E-34  | 12.4 | 66.5 | 2.262 | hsa-miR-3941                          |
| MIMAT0019220    | 1.76E-26  | 4.90E-27  | 10.9 | 50   | 2.262 | hsa-miR-3664-3p                       |
| MIMAT0019944    | 2.19E-38  | 3.21E-39  | 13.3 | 77.9 | 2.261 | hsa-miR-4782-5p                       |
| MIMAT0003292    | 6.92E-27  | 1.89E-27  | 11   | 51   | 2.26  | hsa-miR-623                           |
| MIMAT0022476    | 1.68E-22  | 5.46E-23  | 9.96 | 40.8 | 2.259 | hsa-miR-5692c                         |
| MIMAT0018086    | 1.09E-20  | 3.90E-21  | 9.51 | 36.6 | 2.257 | hsa-miR-3664-5p                       |
| MIMAT0019927    | 1.65E-20  | 5.96E-21  | 9.46 | 36.2 | 2.256 | hsa-miR-4772-3p                       |
| MIMAT0004912    | 2.75E-22  | 8.97E-23  | 9.91 | 40.3 | 2.255 | hsa-miR-890                           |
| MIMAT0027036    | 1.85E-30  | 4.06E-31  | 11.7 | 59.4 | 2.255 | hsa-miR-3912-5p                       |
| MIMAT0002827    | 1.46E-18  | 5.82E-19  | 8.96 | 31.7 | 2.253 | hsa-miR-515-3p                        |
| MIMAT0030020    | 2.83E-25  | 8.21E-26  | 10.6 | 47.2 | 2.252 | hsa-miR-7705                          |
| MIMAT0016912    | 3.74E-24  | 1.13E-24  | 10.3 | 44.7 | 2.251 | hsa-miR-4282                          |
| MIMAT0027367    | 3.67E-19  | 1.43E-19  | 9.12 | 33   | 2.248 | hsa-miR-6733-5p                       |
| MIMAT0026625    | 1.82E-30  | 3.96E-31  | 11.7 | 59.4 | 2.246 | hsa-miR-653-3p                        |
| MIMAT0002826    | 4.19E-14  | 2.07E-14  | 7.69 | 21.3 | 2.245 | hsa-miR-515-5p                        |
| MIMAT0031000    | 4.51E-177 | 1.76E-179 | 30.7 | 400  | 2.244 | hsa-miR-8073                          |
| MIMAT0004960    | 5.14E-18  | 2.10E-18  | 8.81 | 30.4 | 2.238 | hsa-miR-208b-3p                       |
| MIMAT0004509    | 4.19E-18  | 1.70E-18  | 8.84 | 30.6 | 2.238 | hsa-miR-93-3p                         |
| MIMAT0032114, N | 9.00E-29  | 2.18E-29  | 11.4 | 55.4 | 2.237 | hsa-miR-548ad-5p,<br>hsa-miR-548ae-5p |
| MIMAT0003226    | 1.93E-27  | 5.11E-28  | 11.1 | 52.3 | 2.236 | hsa-miR-562                           |
| MIMAT0018990    | 2.59E-20  | 9.46E-21  | 9.41 | 35.7 | 2.236 | hsa-miR-548aj-3p                      |
| MIMAT0019753    | 2.19E-21  | 7.52E-22  | 9.68 | 38.2 | 2.233 | hsa-miR-4671-3p                       |
| MIMAT0019228    | 1.95E-26  | 5.43E-27  | 10.9 | 49.9 | 2.232 | hsa-miR-3925-3p                       |
| MIMAT0018188    | 2.16E-24  | 6.44E-25  | 10.4 | 45.2 | 2.231 | hsa-miR-3914                          |
| MIMAT0022278    | 6.55E-23  | 2.08E-23  | 10.1 | 41.8 | 2.231 | hsa-miR-548at-3p                      |
| MIMAT0026737    | 1.00E-29  | 2.31E-30  | 11.6 | 57.6 | 2.231 | hsa-miR-548j-3p                       |
| MIMAT0019734    | 9.35E-27  | 2.58E-27  | 10.9 | 50.7 | 2.23  | hsa-miR-4659b-3p                      |
| MIMAT0016908    | 1.17E-22  | 3.75E-23  | 10   | 41.2 | 2.23  | hsa-miR-4277                          |
| MIMAT0026476    | 1.50E-19  | 5.70E-20  | 9.22 | 33.9 | 2.23  | hsa-miR-215-3p                        |
| MIMAT0014980    | 7.68E-34  | 1.40E-34  | 12.4 | 67.3 | 2.229 | hsa-miR-3118                          |
| MIMAT0004601    | 1.65E-29  | 3.85E-30  | 11.5 | 57.1 | 2.226 | hsa-miR-145-3p                        |
| MIMAT0030981    | 6.36E-20  | 2.36E-20  | 9.31 | 34.8 | 2.223 | hsa-miR-8054                          |
| MIMAT0019977    | 4.75E-24  | 1.44E-24  | 10.3 | 44.4 | 2.222 | hsa-miR-4799-3p                       |
| MIMAT0000441    | 1.77E-21  | 6.04E-22  | 9.71 | 38.4 | 2.217 | hsa-miR-9-5p                          |
| MIMAT0015020    | 1.39E-23  | 4.32E-24  | 10.2 | 43.3 | 2.217 | hsa-miR-548v                          |
| MIMAT0018998    | 3.08E-22  | 1.01E-22  | 9.89 | 40.2 | 2.213 | hsa-miR-4471                          |

|                 |          |          |      |      |       |                                         |
|-----------------|----------|----------|------|------|-------|-----------------------------------------|
| MIMAT0019895    | 4.18E-22 | 1.39E-22 | 9.86 | 39.9 | 2.212 | hsa-miR-4755-5p                         |
| MIMAT0026736    | 5.74E-28 | 1.45E-28 | 11.2 | 53.5 | 2.212 | hsa-miR-548e-5p                         |
| MIMAT0019804    | 4.61E-19 | 1.80E-19 | 9.09 | 32.8 | 2.211 | hsa-miR-4704-3p                         |
| MIMAT0015008    | 2.38E-23 | 7.47E-24 | 10.2 | 42.8 | 2.21  | hsa-miR-3140-3p                         |
| MIMAT0002817    | 8.33E-16 | 3.77E-16 | 8.19 | 25.3 | 2.205 | hsa-miR-495-3p<br>hsa-miR-3689a-5p,     |
| MIMAT0018117, N | 3.87E-29 | 9.15E-30 | 11.5 | 56.3 | 2.205 | hsa-miR-3689b-5p,<br>hsa-miR-3689e      |
| MIMAT0022481    | 8.00E-22 | 2.70E-22 | 9.79 | 39.2 | 2.202 | hsa-miR-5689                            |
| MIMAT0003330    | 1.28E-27 | 3.35E-28 | 11.1 | 52.7 | 2.2   | hsa-miR-654-5p                          |
| MIMAT0028234    | 1.57E-20 | 5.67E-21 | 9.47 | 36.2 | 2.2   | hsa-miR-7162-5p                         |
| MIMAT0019902    | 4.51E-16 | 2.02E-16 | 8.27 | 25.9 | 2.2   | hsa-miR-4757-3p                         |
| MIMAT0026640    | 8.14E-21 | 2.86E-21 | 9.54 | 36.9 | 2.199 | hsa-miR-670-3p                          |
| MIMAT0002821    | 2.10E-17 | 8.86E-18 | 8.64 | 29   | 2.197 | hsa-miR-181d-5p                         |
| MIMAT0019926    | 1.05E-18 | 4.19E-19 | 9    | 32   | 2.196 | hsa-miR-4772-5p                         |
| MIMAT0004777    | 5.31E-21 | 1.85E-21 | 9.59 | 37.3 | 2.195 | hsa-miR-513a-3p                         |
| MIMAT0009979    | 2.50E-28 | 6.18E-29 | 11.3 | 54.4 | 2.193 | hsa-miR-2054                            |
| MIMAT0000721    | 1.97E-18 | 7.91E-19 | 8.92 | 31.4 | 2.192 | hsa-miR-369-3p<br>hsa-miR-516b-3p, hsa- |
| MIMAT0002860, N | 3.17E-15 | 1.47E-15 | 8.02 | 23.9 | 2.192 | miR-516a-3p                             |
| MIMAT0026626    | 6.72E-28 | 1.72E-28 | 11.2 | 53.4 | 2.189 | hsa-miR-655-5p                          |
| MIMAT0016853    | 8.89E-20 | 3.34E-20 | 9.28 | 34.5 | 2.189 | hsa-miR-4300                            |
| MIMAT0003245    | 7.77E-17 | 3.34E-17 | 8.49 | 27.7 | 2.187 | hsa-miR-580-3p                          |
| MIMAT0017990    | 2.82E-35 | 4.71E-36 | 12.7 | 70.6 | 2.187 | hsa-miR-3613-5p                         |
| MIMAT0021122    | 9.86E-23 | 3.14E-23 | 10   | 41.4 | 2.187 | hsa-miR-5191                            |
| MIMAT0000761    | 3.66E-18 | 1.48E-18 | 8.85 | 30.7 | 2.186 | hsa-miR-324-5p                          |
| MIMAT0021042    | 1.19E-17 | 4.95E-18 | 8.71 | 29.5 | 2.186 | hsa-miR-5009-3p                         |
| MIMAT0003271    | 4.36E-18 | 1.77E-18 | 8.83 | 30.6 | 2.184 | hsa-miR-603                             |
| MIMAT0015063    | 3.97E-20 | 1.46E-20 | 9.37 | 35.3 | 2.181 | hsa-miR-3183                            |
| MIMAT0022479    | 3.65E-18 | 1.48E-18 | 8.85 | 30.7 | 2.181 | hsa-miR-5688                            |
| MIMAT0001075    | 4.93E-16 | 2.21E-16 | 8.26 | 25.8 | 2.181 | hsa-miR-384                             |
| MIMAT0022470    | 1.24E-32 | 2.45E-33 | 12.2 | 64.4 | 2.179 | hsa-miR-5682                            |
| MIMAT0005903    | 1.80E-16 | 7.86E-17 | 8.38 | 26.8 | 2.178 | hsa-miR-1251-5p                         |
| MIMAT0030980    | 1.01E-19 | 3.82E-20 | 9.26 | 34.3 | 2.178 | hsa-miR-8053                            |
| MIMAT0019049    | 2.56E-21 | 8.83E-22 | 9.67 | 38.1 | 2.177 | hsa-miR-4512                            |
| MIMAT0004955    | 1.30E-20 | 4.66E-21 | 9.49 | 36.4 | 2.175 | hsa-miR-374b-5p                         |
| MIMAT0004928    | 2.34E-19 | 8.98E-20 | 9.17 | 33.5 | 2.174 | hsa-miR-147b                            |
| MIMAT0000258    | 4.43E-18 | 1.80E-18 | 8.83 | 30.5 | 2.174 | hsa-miR-181c-5p                         |
| MIMAT0000087    | 8.72E-17 | 3.76E-17 | 8.47 | 27.5 | 2.172 | hsa-miR-30a-5p                          |
| MIMAT0019950    | 9.71E-21 | 3.43E-21 | 9.52 | 36.7 | 2.17  | hsa-miR-1245b-5p                        |
| MIMAT0015029    | 1.54E-18 | 6.14E-19 | 8.95 | 31.6 | 2.169 | hsa-miR-3155a                           |
| MIMAT0019930    | 8.45E-27 | 2.32E-27 | 10.9 | 50.8 | 2.169 | hsa-miR-4774-3p                         |
| MIMAT0018114    | 5.61E-39 | 7.86E-40 | 13.4 | 79.3 | 2.168 | hsa-miR-3686                            |
| MIMAT0000432    | 9.59E-33 | 1.88E-33 | 12.2 | 64.7 | 2.168 | hsa-miR-141-3p                          |
| MIMAT0026478    | 7.55E-20 | 2.81E-20 | 9.3  | 34.6 | 2.167 | hsa-miR-133a-5p                         |
| MIMAT0002825    | 2.91E-14 | 1.42E-14 | 7.73 | 21.7 | 2.166 | hsa-miR-520e                            |
| MIMAT0000250    | 2.59E-18 | 1.04E-18 | 8.89 | 31.1 | 2.161 | hsa-miR-139-5p                          |
| MIMAT0004503    | 9.45E-13 | 4.99E-13 | 7.26 | 18.2 | 2.158 | hsa-miR-29a-5p                          |
| MIMAT0005874    | 3.58E-15 | 1.67E-15 | 8.01 | 23.8 | 2.158 | hsa-miR-548e-3p                         |
| MIMAT0000728    | 1.22E-14 | 5.87E-15 | 7.85 | 22.6 | 2.157 | hsa-miR-375                             |
| MIMAT0017998    | 2.35E-19 | 9.01E-20 | 9.17 | 33.5 | 2.155 | hsa-miR-3618                            |
| MIMAT0022940    | 2.14E-17 | 9.02E-18 | 8.64 | 28.9 | 2.154 | hsa-miR-1178-5p                         |
| MIMAT0002846    | 8.51E-13 | 4.48E-13 | 7.27 | 18.3 | 2.152 | hsa-miR-520c-3p                         |
| MIMAT0002840    | 1.79E-14 | 8.71E-15 | 7.8  | 22.2 | 2.151 | hsa-miR-523-3p                          |
| MIMAT0019815    | 2.76E-40 | 3.58E-41 | 13.7 | 82.3 | 2.15  | hsa-miR-4710                            |
| MIMAT0021036    | 6.32E-25 | 1.85E-25 | 10.5 | 46.4 | 2.15  | hsa-miR-5007-3p                         |
| MIMAT0022472    | 8.96E-19 | 3.54E-19 | 9.01 | 32.1 | 2.149 | hsa-miR-5683                            |
| MIMAT0004587    | 1.91E-19 | 7.27E-20 | 9.19 | 33.7 | 2.147 | hsa-miR-23b-5p                          |

|              |          |          |      |      |       |                   |
|--------------|----------|----------|------|------|-------|-------------------|
| MIMAT0021030 | 5.37E-17 | 2.30E-17 | 8.53 | 28   | 2.146 | hsa-miR-548ao-3p  |
| MIMAT0003296 | 3.96E-21 | 1.37E-21 | 9.62 | 37.6 | 2.146 | hsa-miR-627-5p    |
| MIMAT0005799 | 3.51E-20 | 1.29E-20 | 9.38 | 35.4 | 2.145 | hsa-miR-1283      |
| MIMAT0003879 | 1.23E-20 | 4.40E-21 | 9.5  | 36.5 | 2.145 | hsa-miR-758-3p    |
| MIMAT0002856 | 1.44E-15 | 6.57E-16 | 8.13 | 24.7 | 2.144 | hsa-miR-520d-3p   |
| MIMAT0015066 | 2.44E-15 | 1.13E-15 | 8.06 | 24.2 | 2.144 | hsa-miR-3065-5p   |
| MIMAT0003311 | 4.00E-17 | 1.70E-17 | 8.57 | 28.3 | 2.143 | hsa-miR-641       |
| MIMAT0005936 | 3.34E-19 | 1.29E-19 | 9.13 | 33.1 | 2.143 | hsa-miR-1278      |
| MIMAT0026613 | 5.47E-21 | 1.91E-21 | 9.59 | 37.3 | 2.142 | hsa-miR-510-3p    |
| MIMAT0019866 | 7.91E-22 | 2.66E-22 | 9.79 | 39.2 | 2.142 | hsa-miR-4738-5p   |
| MIMAT0018963 | 2.08E-12 | 1.12E-12 | 7.15 | 17.4 | 2.142 | hsa-miR-4445-5p   |
| MIMAT0000729 | 6.89E-13 | 3.61E-13 | 7.3  | 18.5 | 2.141 | hsa-miR-376a-3p   |
| MIMAT0000244 | 2.37E-17 | 1.00E-17 | 8.63 | 28.8 | 2.141 | hsa-miR-30c-5p    |
| MIMAT0025456 | 2.33E-24 | 6.98E-25 | 10.4 | 45.1 | 2.139 | hsa-miR-548az-5p  |
| MIMAT0004675 | 2.07E-15 | 9.50E-16 | 8.08 | 24.4 | 2.138 | hsa-miR-219a-2-3p |
| MIMAT0018196 | 1.37E-23 | 4.24E-24 | 10.2 | 43.3 | 2.135 | hsa-miR-3921      |
| MIMAT0004481 | 8.59E-20 | 3.22E-20 | 9.28 | 34.5 | 2.135 | hsa-let-7a-3p     |
| MIMAT0028227 | 1.48E-23 | 4.62E-24 | 10.2 | 43.3 | 2.135 | hsa-miR-7158-3p   |
| MIMAT0000685 | 2.30E-17 | 9.73E-18 | 8.63 | 28.9 | 2.135 | hsa-miR-34b-5p    |
| MIMAT0019842 | 1.14E-15 | 5.18E-16 | 8.15 | 25   | 2.134 | hsa-miR-4724-3p   |
| MIMAT0004923 | 1.05E-18 | 4.17E-19 | 9    | 32   | 2.129 | hsa-miR-875-3p    |
| MIMAT0005940 | 4.14E-21 | 1.44E-21 | 9.62 | 37.6 | 2.125 | hsa-miR-1282      |
| MIMAT0014978 | 1.93E-16 | 8.47E-17 | 8.38 | 26.7 | 2.123 | hsa-miR-3116      |
| MIMAT0025473 | 1.97E-20 | 7.12E-21 | 9.44 | 36   | 2.121 | hsa-miR-6508-3p   |
| MIMAT0019976 | 2.06E-16 | 9.04E-17 | 8.37 | 26.7 | 2.12  | hsa-miR-4799-5p   |
| MIMAT0021025 | 1.86E-20 | 6.72E-21 | 9.45 | 36.1 | 2.119 | hsa-miR-5003-5p   |
| MIMAT0004612 | 6.93E-19 | 2.73E-19 | 9.04 | 32.4 | 2.117 | hsa-miR-186-3p    |
| MIMAT0032026 | 9.43E-19 | 3.74E-19 | 9.01 | 32.1 | 2.115 | hsa-miR-301b-5p   |
| MIMAT0000103 | 2.33E-15 | 1.07E-15 | 8.06 | 24.2 | 2.115 | hsa-miR-106a-5p   |
| MIMAT0018976 | 8.78E-91 | 1.95E-92 | 21.2 | 200  | 2.114 | hsa-miR-4454      |
| MIMAT0022469 | 2.41E-20 | 8.76E-21 | 9.42 | 35.8 | 2.114 | hsa-miR-5681a     |
| MIMAT0003332 | 2.57E-15 | 1.19E-15 | 8.05 | 24.1 | 2.107 | hsa-miR-656-3p    |
| MIMAT0015001 | 1.45E-16 | 6.28E-17 | 8.41 | 27   | 2.097 | hsa-miR-3135a     |
| MIMAT0003339 | 1.43E-18 | 5.71E-19 | 8.96 | 31.7 | 2.096 | hsa-miR-421       |
| MIMAT0003284 | 4.19E-18 | 1.70E-18 | 8.84 | 30.6 | 2.096 | hsa-miR-616-5p    |
| MIMAT0000081 | 4.13E-17 | 1.76E-17 | 8.56 | 28.3 | 2.095 | hsa-miR-25-3p     |
| MIMAT0018939 | 8.61E-12 | 4.75E-12 | 6.94 | 16   | 2.095 | hsa-miR-4424      |
| MIMAT0026611 | 3.45E-19 | 1.34E-19 | 9.12 | 33.1 | 2.094 | hsa-miR-520g-5p   |
| MIMAT0021026 | 2.84E-24 | 8.55E-25 | 10.4 | 44.9 | 2.094 | hsa-miR-5003-3p   |
| MIMAT0019879 | 1.03E-17 | 4.25E-18 | 8.73 | 29.7 | 2.092 | hsa-miR-4745-3p   |
| MIMAT0018187 | 3.85E-22 | 1.28E-22 | 9.87 | 40   | 2.09  | hsa-miR-3913-5p   |
| MIMAT0023703 | 7.63E-20 | 2.85E-20 | 9.29 | 34.6 | 2.089 | hsa-miR-6078      |
| MIMAT0004497 | 4.21E-15 | 1.98E-15 | 7.99 | 23.6 | 2.089 | hsa-miR-24-2-5p   |
| MIMAT0004775 | 5.13E-17 | 2.19E-17 | 8.54 | 28.1 | 2.088 | hsa-miR-502-3p    |
| MIMAT0004599 | 1.86E-19 | 7.08E-20 | 9.19 | 33.7 | 2.088 | hsa-miR-143-5p    |
| MIMAT0001412 | 3.56E-12 | 1.93E-12 | 7.07 | 16.9 | 2.083 | hsa-miR-18b-5p    |
| MIMAT0021019 | 2.30E-24 | 6.86E-25 | 10.4 | 45.1 | 2.083 | hsa-miR-5000-5p   |
| MIMAT0000261 | 7.17E-15 | 3.40E-15 | 7.92 | 23.1 | 2.081 | hsa-miR-183-5p    |
| MIMAT0022292 | 1.57E-24 | 4.66E-25 | 10.4 | 45.5 | 2.072 | hsa-miR-548au-3p  |
| MIMAT0000086 | 5.95E-15 | 2.81E-15 | 7.94 | 23.3 | 2.071 | hsa-miR-29a-3p    |
| MIMAT0022923 | 6.21E-28 | 1.58E-28 | 11.2 | 53.4 | 2.07  | hsa-miR-376b-5p   |
| MIMAT0019894 | 8.07E-17 | 3.47E-17 | 8.48 | 27.6 | 2.068 | hsa-miR-4754      |
| MIMAT0005900 | 1.03E-17 | 4.27E-18 | 8.73 | 29.7 | 2.065 | hsa-miR-1248      |
| MIMAT0022281 | 2.51E-14 | 1.23E-14 | 7.75 | 21.8 | 2.062 | hsa-miR-5583-5p   |
| MIMAT0016850 | 8.94E-18 | 3.68E-18 | 8.75 | 29.8 | 2.062 | hsa-miR-4301      |
| MIMAT0000755 | 8.53E-14 | 4.30E-14 | 7.59 | 20.6 | 2.06  | hsa-miR-323a-3p   |
| MIMAT0005915 | 4.88E-19 | 1.91E-19 | 9.08 | 32.8 | 2.058 | hsa-miR-1263      |
| MIMAT0019067 | 4.04E-15 | 1.89E-15 | 7.99 | 23.7 | 2.057 | hsa-miR-4528      |

|              |           |           |      |      |       |                  |
|--------------|-----------|-----------|------|------|-------|------------------|
| MIMAT0004565 | 1.33E-13  | 6.79E-14  | 7.53 | 20.2 | 2.056 | hsa-miR-218-1-3p |
| MIMAT0031006 | 1.17E-20  | 4.18E-21  | 9.5  | 36.5 | 2.056 | hsa-miR-8079     |
| MIMAT0003231 | 3.73E-15  | 1.74E-15  | 8    | 23.8 | 2.056 | hsa-miR-567      |
| MIMAT0018995 | 1.15E-19  | 4.36E-20  | 9.25 | 34.2 | 2.055 | hsa-miR-4468     |
| MIMAT0001541 | 7.29E-16  | 3.29E-16  | 8.21 | 25.4 | 2.055 | hsa-miR-449a     |
| MIMAT0007402 | 9.21E-20  | 3.47E-20  | 9.27 | 34.4 | 2.054 | hsa-miR-103b     |
| MIMAT0022701 | 5.85E-16  | 2.63E-16  | 8.24 | 25.6 | 2.052 | hsa-miR-506-5p   |
| MIMAT0024612 | 1.84E-23  | 5.77E-24  | 10.2 | 43   | 2.052 | hsa-miR-378j     |
| MIMAT0027608 | 1.74E-15  | 8.01E-16  | 8.1  | 24.5 | 2.052 | hsa-miR-6854-5p  |
| MIMAT0001620 | 9.15E-18  | 3.77E-18  | 8.74 | 29.8 | 2.051 | hsa-miR-200a-5p  |
| MIMAT0016880 | 2.83E-49  | 2.34E-50  | 15.2 | 103  | 2.051 | hsa-miR-4259     |
| MIMAT0000420 | 1.57E-18  | 6.29E-19  | 8.95 | 31.6 | 2.05  | hsa-miR-30b-5p   |
| MIMAT0028218 | 7.45E-19  | 2.94E-19  | 9.04 | 32.3 | 2.049 | hsa-miR-7154-5p  |
| MIMAT0000459 | 7.90E-14  | 3.97E-14  | 7.6  | 20.7 | 2.048 | hsa-miR-193a-3p  |
| MIMAT0000415 | 1.37E-15  | 6.25E-16  | 8.13 | 24.8 | 2.046 | hsa-let-7i-5p    |
| MIMAT0031015 | 6.19E-13  | 3.24E-13  | 7.32 | 18.6 | 2.044 | hsa-miR-8088     |
| MIMAT0002811 | 5.01E-16  | 2.25E-16  | 8.26 | 25.8 | 2.043 | hsa-miR-202-3p   |
| MIMAT0022692 | 8.45E-21  | 2.98E-21  | 9.54 | 36.9 | 2.041 | hsa-miR-181b-3p  |
| MIMAT0028233 | 1.17E-17  | 4.88E-18  | 8.71 | 29.6 | 2.039 | hsa-miR-7161-3p  |
| MIMAT0000707 | 5.44E-13  | 2.84E-13  | 7.34 | 18.8 | 2.037 | hsa-miR-363-3p   |
| MIMAT0016925 | 2.18E-21  | 7.49E-22  | 9.69 | 38.2 | 2.035 | hsa-miR-500b-5p  |
| MIMAT0019363 | 3.45E-12  | 1.87E-12  | 7.07 | 16.9 | 2.034 | hsa-miR-3978     |
| MIMAT0019776 | 1.17E-245 | 4.58E-249 | 37.3 | 560  | 2.033 | hsa-miR-1343-3p  |
| MIMAT0002832 | 6.71E-20  | 2.50E-20  | 9.31 | 34.8 | 2.032 | hsa-miR-519c-3p  |
| MIMAT0027410 | 6.16E-23  | 1.96E-23  | 10.1 | 41.8 | 2.03  | hsa-miR-6755-5p  |
| MIMAT0022501 | 4.62E-17  | 1.97E-17  | 8.55 | 28.2 | 2.028 | hsa-miR-5707     |
| MIMAT0005877 | 1.52E-16  | 6.60E-17  | 8.41 | 27   | 2.027 | hsa-miR-1286     |
| MIMAT0027607 | 3.77E-16  | 1.67E-16  | 8.29 | 26.1 | 2.026 | hsa-miR-6853-3p  |
| MIMAT0026617 | 9.23E-13  | 4.87E-13  | 7.26 | 18.2 | 2.023 | hsa-miR-580-5p   |
| MIMAT0018000 | 1.36E-14  | 6.58E-15  | 7.83 | 22.5 | 2.022 | hsa-miR-23c      |
| MIMAT0004570 | 3.65E-15  | 1.70E-15  | 8.01 | 23.8 | 2.022 | hsa-miR-223-5p   |
| MIMAT0019222 | 2.65E-16  | 1.17E-16  | 8.34 | 26.4 | 2.022 | hsa-miR-3682-5p  |
| MIMAT0007885 | 1.10E-14  | 5.28E-15  | 7.86 | 22.7 | 2.022 | hsa-miR-1911-5p  |
| MIMAT0027580 | 2.00E-34  | 3.53E-35  | 12.5 | 68.6 | 2.017 | hsa-miR-6839-5p  |
| MIMAT0024611 | 1.25E-22  | 4.02E-23  | 9.99 | 41.1 | 2.015 | hsa-miR-6128     |
| MIMAT0015000 | 2.66E-18  | 1.07E-18  | 8.89 | 31   | 2.014 | hsa-miR-3134     |
| MIMAT0002178 | 2.36E-14  | 1.15E-14  | 7.76 | 21.9 | 2.014 | hsa-miR-487a-3p  |
| MIMAT0015011 | 8.96E-15  | 4.27E-15  | 7.89 | 22.9 | 2.009 | hsa-miR-3142     |
| MIMAT0035703 | 6.68E-18  | 2.74E-18  | 8.78 | 30.1 | 2.008 | hsa-miR-548bb-5p |
| MIMAT0019056 | 9.28E-16  | 4.21E-16  | 8.18 | 25.2 | 2.008 | hsa-miR-4519     |
| MIMAT0022702 | 2.18E-17  | 9.21E-18  | 8.64 | 28.9 | 2.005 | hsa-miR-514a-5p  |
| MIMAT0003215 | 3.36E-14  | 1.65E-14  | 7.72 | 21.6 | 2.004 | hsa-miR-552-3p   |
| MIMAT0019876 | 1.46E-11  | 8.13E-12  | 6.86 | 15.5 | 2.004 | hsa-miR-3591-5p  |
| MIMAT0019906 | 6.31E-15  | 2.98E-15  | 7.94 | 23.2 | 2.001 | hsa-miR-4760-5p  |

### GSE 106817 downregulated miRNAs

| ID           | adj.P.Val | P.Value   | t   | B    | logFC | miRNA_ID_LIST     |
|--------------|-----------|-----------|-----|------|-------|-------------------|
| MIMAT0004602 | 9.08E-115 | 1.17E-116 | -24 | 255  | -3.28 | hsa-miR-125a-3p   |
| MIMAT0019015 | 4.73E-89  | 1.14E-90  | -21 | 196  | -3.1  | hsa-miR-4481      |
| MIMAT0019710 | 6.04E-106 | 9.41E-108 | -23 | 235  | -2.97 | hsa-miR-4648      |
| MIMAT0004592 | 4.61E-31  | 9.75E-32  | -12 | 60.8 | -2.73 | hsa-miR-125b-1-3p |
| MIMAT0026554 | 2.25E-34  | 3.99E-35  | -13 | 68.5 | -2.72 | hsa-miR-433-5p    |
| MIMAT0024610 | 5.34E-94  | 1.04E-95  | -22 | 207  | -2.53 | hsa-miR-6127      |
| MIMAT0019852 | 4.79E-110 | 7.1E-112  | -24 | 244  | -2.48 | hsa-miR-4730      |
| MIMAT0027363 | 2.91E-83  | 7.83E-85  | -20 | 182  | -2.32 | hsa-miR-6731-5p   |
| MIMAT0018164 | 5.74E-33  | 1.11E-33  | -12 | 65.2 | -2.32 | hsa-miR-3713      |
| MIMAT0027614 | 6.18E-73  | 2.05E-74  | -19 | 159  | -2.3  | hsa-miR-6857-5p   |
| MIMAT0025458 | 3.6E-36   | 5.81E-37  | -13 | 72.7 | -2.29 | hsa-miR-6501-5p   |



|              |           |           |     |      |       |                 |
|--------------|-----------|-----------|-----|------|-------|-----------------|
| MIMAT0015064 | 3.67E-141 | 2.72E-143 | -27 | 317  | -2.28 | hsa-miR-3184-5p |
| MIMAT0015017 | 3.71E-54  | 2.44E-55  | -16 | 115  | -2.26 | hsa-miR-1273c   |
| MIMAT0003240 | 7.65E-141 | 5.96E-143 | -27 | 316  | -2.25 | hsa-miR-575     |
| MIMAT0018121 | 6.11E-31  | 1.3E-31   | -12 | 60.5 | -2.18 | hsa-miR-3692-5p |
| MIMAT0004589 | 4.2E-46   | 4.11E-47  | -15 | 95.9 | -2.12 | hsa-miR-30b-3p  |
| MIMAT0011778 | 9.26E-27  | 2.55E-27  | -11 | 50.7 | -2.11 | hsa-miR-2278    |
| MIMAT0027402 | 2.97E-35  | 4.97E-36  | -13 | 70.6 | -2.05 | hsa-miR-6751-5p |
| MIMAT0027666 | 1.2E-22   | 3.86E-23  | -10 | 41.2 | -2.05 | hsa-miR-6883-5p |

#### GSE 59856 upregulated miRNAs

| ID           | adj.P.Val | P.Value  | t    | B    | logFC | miRNA_ID_LIST   |
|--------------|-----------|----------|------|------|-------|-----------------|
| MIMAT0019964 | 2.05E-29  | 1.2E-31  | 13.5 | 61.2 | 1.08  | hsa-miR-4792    |
| MIMAT0023700 | 2.59E-48  | 4.05E-51 | 19.2 | 106  | 1.03  | hsa-miR-6075    |
| MIMAT0005898 | 1.87E-14  | 5.85E-16 | 8.67 | 25.4 | 1.01  | hsa-miR-1246    |
| MIMAT0020603 | 3.66E-15  | 1.1E-16  | 8.91 | 27.1 | 0.988 | hsa-miR-5096    |
| MIMAT0005880 | 1.85E-12  | 7.16E-14 | 7.94 | 20.7 | 0.959 | hsa-miR-1290    |
| MIMAT0022286 | 1.22E-21  | 1.86E-23 | 11.1 | 42.5 | 0.954 | hsa-miR-5585-3p |
| MIMAT0027574 | 1.82E-26  | 1.57E-28 | 12.6 | 54.1 | 0.873 | hsa-miR-6836-5p |
| MIMAT0019855 | 1.14E-14  | 3.53E-16 | 8.74 | 25.9 | 0.868 | hsa-miR-4732-5p |
| MIMAT0005876 | 1.8E-13   | 6.06E-15 | 8.32 | 23.1 | 0.816 | hsa-miR-1285-3p |
| MIMAT0026622 | 2.4E-17   | 5.55E-19 | 9.67 | 32.3 | 0.814 | hsa-miR-619-5p  |

#### GSE 59856 downregulated miRNAs

| ID           | adj.P.Val | P.Value  | t   | B    | logFC | miRNA_ID_LIST     |
|--------------|-----------|----------|-----|------|-------|-------------------|
| MIMAT0004602 | 3.14E-71  | 1.23E-74 | -27 | 159  | -2.47 | hsa-miR-125a-3p   |
| MIMAT0022693 | 4.84E-42  | 1.14E-44 | -17 | 90.9 | -1.63 | hsa-miR-204-3p    |
| MIMAT0004592 | 2.76E-52  | 3.24E-55 | -21 | 115  | -1.62 | hsa-miR-125b-1-3p |
| MIMAT0019003 | 3.48E-36  | 1.36E-38 | -16 | 77.1 | -1.57 | hsa-miR-4476      |
| MIMAT0018971 | 2.48E-28  | 1.65E-30 | -13 | 58.6 | -1.47 | hsa-miR-4450      |
| MIMAT0029782 | 3.32E-26  | 3.25E-28 | -13 | 53.4 | -1.42 | hsa-miR-7641      |
| MIMAT0003240 | 9.65E-40  | 3.02E-42 | -17 | 85.4 | -1.41 | hsa-miR-575       |
| MIMAT0027686 | 1.57E-63  | 1.23E-66 | -24 | 141  | -1.36 | hsa-miR-6893-5p   |
| MIMAT0027431 | 7.18E-32  | 3.37E-34 | -14 | 67   | -1.23 | hsa-miR-6765-3p   |
| MIMAT0003228 | 3.28E-19  | 6.29E-21 | -10 | 36.7 | -1.12 | hsa-miR-564       |
